# Supplementary material for: Copper-catalysed cross-coupling affected by the Smiles rearrangement: a new chapter on diversifying the synthesis of chiral fluorinated 1,4-benzoxazine derivatives
Source: Royal Society of Chemistry journal article supplement (doi:10.1039/c5ra18897k), 2015-01-01
Supplement: c5ra18897k1.pdf [file c5ra18897k1.pdf]

## Supporting information

### Copper-Catalysed Cross-Coupling Affected by the Smiles Rearrangement: A New Chapter on Diversifying the Synthesis of Chiral Fluorinated 1,4-Benzoxazine Derivatives

Saba Alapour,<sup>†</sup> Deresh Ramjugernath,<sup>‡</sup> and Neil A. Koorbanally<sup>\*,†</sup>

<sup>†</sup> School of Chemistry, University of KwaZulu-Natal, Private Bag X54001, Durban 4000, South Africa

<sup>‡</sup> School of Chemical Engineering, University of KwaZulu-Natal, Private Bag X54001, Durban 4000, South Africa

#### Table of contents

1. General
2. Optimization of conditions for formation of Boc-[1,4]benzoxazine (**Table 1**)
3. Experimental Procedures
4. NMR spectra
5. HRMS data
6. Elemental analysis

## General

### Material and Methods

Reagents and solvents were purchased from Sigma Aldrich and used as received. Commercially available Merck Kieselgel 60 F<sub>254</sub> aluminium backed plates were used for TLC analysis. Visualisation of TLC plates was achieved by UV fluorescence and iodine vapour. Compounds were purified by column chromatography packed with 60-200 mesh Silica gel.

All NMR spectra were recorded on Bruker AVANCE III 400 or 600 MHz instruments. Chemical shifts are quoted in parts per million (ppm) downfield from TMS as the internal standard and the coupling constants are reported in Hertz. Multiplicities of the NMR resonances are abbreviated as s (singlet), d (doublet), t (triplet), q (quartet), m (multiplet) and br (broad). Assignments of <sup>1</sup>H NMR, <sup>13</sup>C NMR and <sup>19</sup>F NMR resonances were made with the aid of COSY, NOESY, HMBC and HSQC experiments. High resolution spectrometric data were obtained using a Waters micromass LCT premier TOF-MS instrument. Infra-red spectra were recorded in the range 4000-600 cm<sup>-1</sup> on a Perkin Elmer Spectrum as neat films onto a NaCl window. Elemental analysis was carried out on a Thermo Scientific Flash 2000. Melting points were obtained on a Stuart Melting Point apparatus SMP11 and are uncorrected. Abbreviations used are: w (weak), m (medium), s (strong) and br (broad). Optical rotations were measured using a Perkin-Elmer 341 polarimeter.

**Table 1.** Optimization of conditions for formation of Boc-[1,4]benzoxazine.

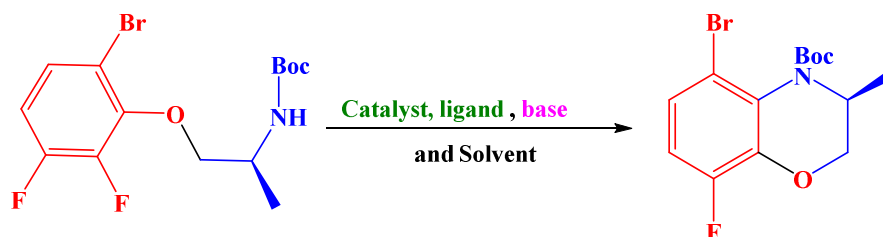

| No.                      | cat.                                   | ligand           | base                                | solvent | temp. <sup>a</sup> | yield <sup>b,c</sup> |
|--------------------------|----------------------------------------|------------------|-------------------------------------|---------|--------------------|----------------------|
| Solvent optimisation     |                                        |                  |                                     |         |                    |                      |
| 1                        | Cu(OAc) <sub>2</sub> .H <sub>2</sub> O | none             | Cs <sub>2</sub> CO <sub>3</sub>     | THF     | 90                 | trace                |
| 2                        | Cu(OAc) <sub>2</sub> .H <sub>2</sub> O | none             | Cs <sub>2</sub> CO <sub>3</sub>     | toluene | 90                 | trace                |
| 3                        | Cu(OAc) <sub>2</sub> .H <sub>2</sub> O | none             | Cs <sub>2</sub> CO <sub>3</sub>     | dioxan  | 90                 | 75                   |
| 4                        | Cu(OAc) <sub>2</sub> .H <sub>2</sub> O | none             | Cs <sub>2</sub> CO <sub>3</sub>     | DMSO    | 90                 | 75                   |
| 5                        | Cu(OAc) <sub>2</sub> .H <sub>2</sub> O | none             | Cs <sub>2</sub> CO <sub>3</sub>     | DMF     | 90                 | 95                   |
| 6                        | Cu(OAc) <sub>2</sub> .H <sub>2</sub> O | none             | Cs <sub>2</sub> CO <sub>3</sub>     | NMP     | 90                 | 98                   |
| catalyst optimisation    |                                        |                  |                                     |         |                    |                      |
| 7                        | CuBr                                   | none             | Cs <sub>2</sub> CO <sub>3</sub>     | NMP     | 90                 | 60                   |
| 8                        | CuI                                    | none             | Cs <sub>2</sub> CO <sub>3</sub>     | NMP     | 90                 | 66                   |
| 9                        | CuSO <sub>4</sub>                      | none             | Cs <sub>2</sub> CO <sub>3</sub>     | NMP     | 90                 | 79                   |
| 10                       | Cu(OAc) <sub>2</sub> .H <sub>2</sub> O | none             | Cs <sub>2</sub> CO <sub>3</sub>     | NMP     | 90                 | 98                   |
| 11                       | none                                   | none             | Cs <sub>2</sub> CO <sub>3</sub>     | NMP     | 90                 | None                 |
| Base optimisation        |                                        |                  |                                     |         |                    |                      |
| 12                       | Cu(OAc) <sub>2</sub> .H <sub>2</sub> O | none             | None                                | NMP     | 90                 | none                 |
| 13                       | Cu(OAc) <sub>2</sub> .H <sub>2</sub> O | none             | TEA <sup>d</sup>                    | NMP     | 90                 | trace                |
| 14                       | Cu(OAc) <sub>2</sub> .H <sub>2</sub> O | none             | NaOC(CH <sub>3</sub> ) <sub>3</sub> | NMP     | 90                 | 73                   |
| 15                       | Cu(OAc) <sub>2</sub> .H <sub>2</sub> O | none             | KOH                                 | NMP     | 90                 | 80                   |
| 16                       | Cu(OAc) <sub>2</sub> .H <sub>2</sub> O | none             | K <sub>2</sub> CO <sub>3</sub>      | NMP     | 90                 | 87                   |
| 17                       | Cu(OAc) <sub>2</sub> .H <sub>2</sub> O | none             | Cs <sub>2</sub> CO <sub>3</sub>     | NMP     | 90                 | 98                   |
| Ligand optimisation      |                                        |                  |                                     |         |                    |                      |
| 18                       | Cu(OAc) <sub>2</sub> .H <sub>2</sub> O | 1,2-diamine      | Cs <sub>2</sub> CO <sub>3</sub>     | NMP     | 90                 | 80                   |
| 19                       | Cu(OAc) <sub>2</sub> .H <sub>2</sub> O | Hyp <sup>e</sup> | Cs <sub>2</sub> CO <sub>3</sub>     | NMP     | 90                 | 83                   |
| 20                       | Cu(OAc) <sub>2</sub> .H <sub>2</sub> O | xantphos         | Cs <sub>2</sub> CO <sub>3</sub>     | NMP     | 90                 | 85                   |
| 21                       | Cu(OAc) <sub>2</sub> .H <sub>2</sub> O | L-proline        | Cs <sub>2</sub> CO <sub>3</sub>     | NMP     | 90                 | 90                   |
| 22                       | Cu(OAc) <sub>2</sub> .H <sub>2</sub> O | none             | Cs <sub>2</sub> CO <sub>3</sub>     | NMP     | 90                 | 98                   |
| Temperature optimisation |                                        |                  |                                     |         |                    |                      |
| 23                       | Cu(OAc) <sub>2</sub> .H <sub>2</sub> O | none             | Cs <sub>2</sub> CO <sub>3</sub>     | NMP     | 25                 | 90                   |

<sup>a</sup> Temperature (°C). <sup>b</sup> Isolated yield (%). <sup>c</sup> The reaction time for all reactions is 24 hours. <sup>d</sup> TEA: triethylamine <sup>e</sup> Hyp: *trans*-4-Hydroxy-*L*-proline

## Experimental Procedures

Compounds **2-4** were prepared according to standard procedures reported in the literature.<sup>1, 2</sup>

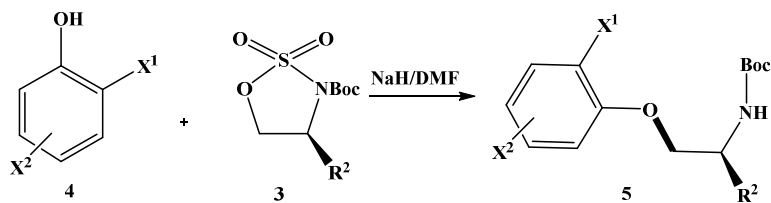

**General experimental procedure for the preparation of adduct 5:** NaH (60 % dispersion in mineral oil, 40 mg, 1.01 mmol) was added to a solution of phenol **4** (211 mg, 1.01 mmol) in anhydrous DMF (10 mL) and the resultant mixture stirred at r.t. for 5 minutes. Cyclic sulfamidate **3** (200 mg, 0.84 mmol) was added and the mixture stirred at r.t. for 15 h prior to being concentrated in vacuo. The mixture was washed with saturated aq. NaCl and extracted with CH<sub>2</sub>Cl<sub>2</sub> (3 × 20 mL). The combined organic extracts were concentrated in vacuo to afford amine **5**. This material was suitable for subsequent applications without any further purification. For analysis, a small portion was isolated by Column chromatography (EtOAc/hexane: 5:95).

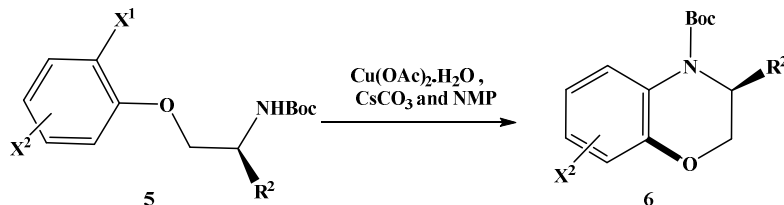

**General experimental procedure for the preparation of dihydrobenzo[1,4]oxazines 6:** In a 10 mL round bottom flask, Cu(OAc)<sub>2</sub>.H<sub>2</sub>O (0.2 equiv), Cs<sub>2</sub>CO<sub>3</sub> (3 equiv), and compound **5** (60 mg) were dissolved in NMP (5.0 mL). The mixture was stirred at 90 °C, and the progress of the reaction monitored by TLC. After 24 h the solvent was evaporated in vacuo and the residue diluted with CH<sub>2</sub>Cl<sub>2</sub> (20 mL), washed with water (2×10 mL) and brine (2×10 mL), dried (Na<sub>2</sub>SO<sub>4</sub>) and concentrated in vacuo. The residue was purified by column chromatography (EtOAc/hexane: 10:90) to afford Boc-benzoxazine **6**.

## Characterisation data for compounds 5a-i and 6a, 6c, 6d and 6f

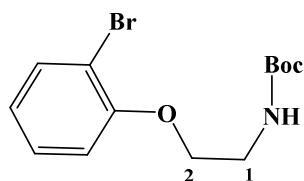

### *tert*-butyl (2-(2-bromophenoxy)ethyl)carbamate (**5a**):

colourless oil;  $\nu_{\max}$  /cm<sup>-1</sup>(film) 3441 (m), 2978 (m), 2934 (m), 1712 (s), 1587 (m), 1574 (m), 1509 (s), 1481 (s), 1278 (m), 1057 (s). <sup>1</sup>H NMR (400 MHz, CDCl<sub>3</sub>)  $\delta_{\text{H}}$  1.41 (9H, s, NCO<sub>2</sub>C(CH<sub>3</sub>)<sub>3</sub>), 3.51 (2H, m, 2C1-H), 4.00 (2H, t, 2C2-H,  $J=5.2$ ), 5.24 (1H, br s, NH), 6.79 (2H, m, ArCH), 7.18 (1H, m, ArCH), 7.46 (1H, dd,  $J=7.8, 1.5$  Hz, ArCH); <sup>13</sup>C NMR (100 MHz, CDCl<sub>3</sub>)  $\delta_{\text{C}}$  28.4 (NCO<sub>2</sub>C(CH<sub>3</sub>)<sub>3</sub>), 40.0 (C-1), 68.5 (C-2), 76.9 (NCO<sub>2</sub>C(CH<sub>3</sub>)<sub>3</sub>), 113.7 (ArCH), 122.3 (ArCH), 128.5 (ArCH), 133.2 (ArCH), 154.9 (s, C=O). The signals for the two aromatic quaternary carbons were not observed in the <sup>13</sup>C NMR spectrum. HRMS–ES<sup>+</sup>:  $m/z$  [M+Na] calcd for C<sub>13</sub>H<sub>18</sub>BrNO<sub>3</sub>: 338.0368, found: 338.0376.

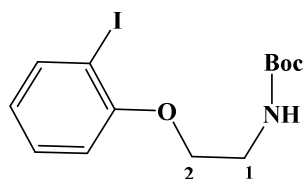

### *tert*-butyl (2-(2-iodophenoxy)ethyl)carbamate (**5b**):

colourless oil;  $\nu_{\max}$ /cm<sup>-1</sup>(film) 3355 (m), 2977 (m), 2934(m), 1711 (s), 1582(m), 1520 (s), 1475 (s), 1276 (m), 1247 (s), 1056 (s). <sup>1</sup>H NMR (400 MHz, CDCl<sub>3</sub>)  $\delta_{\text{H}}$  1.37 (9H, s, NCO<sub>2</sub>C(CH<sub>3</sub>)<sub>3</sub>), 3.49 (2H, m, 2C1-H), 3.96 (2H, t, 2C2-H,  $J=5.1$  Hz), 5.08 (1H, br s, NH), 6.63 (1H, td, ArCH,  $J=7.6, 1.0$  Hz), 6.71 (1H, dd, ArCH,  $J=7.3, 0.8$  Hz), 7.18 (1H, m, ArCH), 7.67 (1H, td, ArCH,  $J=7.8, 1.5$  Hz); <sup>13</sup>C NMR (100 MHz, CDCl<sub>3</sub>)  $\delta_{\text{C}}$  28.4 (NCO<sub>2</sub>C(CH<sub>3</sub>)<sub>3</sub>), 40.0 (C-1), 68.6 (C-2), 79.5 (NCO<sub>2</sub>C(CH<sub>3</sub>)<sub>3</sub>), 86.8 (ArC-I), 112.5 (ArCH), 123.0 (ArCH), 129.6, (ArCH), 139.4 (ArCH), 155.9 (s, C=O), 157.0 (ArC). HRMS–ES<sup>+</sup>:  $m/z$  [M+Na] calcd for C<sub>13</sub>H<sub>18</sub>INO<sub>3</sub>: 386.0229; found: 386.0230.

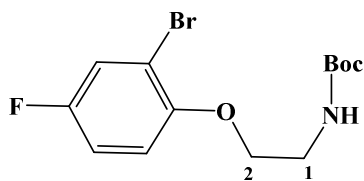

**tert-butyl (2-(2-bromo-4-fluorophenoxy)ethyl)carbamate (5c):**

colourless oil;  $\nu_{\max}/\text{cm}^{-1}$ (film) 3356 (m), 2979 (m), 2935 (m), 1712 (s), 1593 (m), 1493 (s), 1257 (m), 1171 (m), 1048 (s).  $^1\text{H}$  NMR (400 MHz,  $\text{CDCl}_3$ )  $\delta_{\text{H}}$  1.37 (9H, s,  $\text{NCO}_2\text{C}(\text{CH}_3)_3$ ), 3.47 (2H, m, 2C1-H), 3.95 (2H, t, 2C2-H,  $J=5.0$  Hz), 5.06 (1H, br, s, NH), 6.76 (1H, dd, ArCH,  $J=9.0, 4.7$  Hz), 6.88 (1H, m, ArCH), 7.20 (1H, dd, ArCH,  $J=7.8, 3.0$  Hz);  $^{13}\text{C}$  NMR (100 MHz,  $\text{CDCl}_3$ )  $\delta_{\text{C}}$  28.4 ( $\text{NCO}_2\text{C}(\text{CH}_3)_3$ ), 40.0 (C-1), 69.4 (C-2), 79.6 ( $\text{NCO}_2\text{C}(\text{CH}_3)_3$ ), 114.3 (d,  $J=8.3$  Hz, ArCH), 114.8 (d,  $J=22.5$  Hz, ArCH), 120.4 (d,  $J=25.7$  Hz, ArCH), 151.6 (d,  $J=2.9$  Hz, ArC), 156.0 (s, 2C, C=O, ArC-O), 156.9 (d,  $J=243.5$  Hz, ArC). HRMS-ES<sup>+</sup>:  $m/z$  [M+Na] calcd for  $\text{C}_{13}\text{H}_{17}\text{BrFNO}_3$ : 356.0274; found: 356.0276.

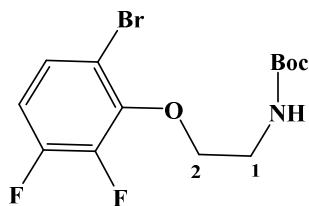

**tert-butyl (2-(6-bromo-2,3-difluorophenoxy)ethyl)carbamate (5d):**

colourless oil;  $\nu_{\max}/\text{cm}^{-1}$ (film) 3359 (m), 2979 (s), 2934 (s), 1705 (s), 1612 (m), 1584 (m), 1487 (s), 1292 (m), 1171 (s), 1054 (m).  $^1\text{H}$  NMR (400 MHz,  $\text{CDCl}_3$ )  $\delta_{\text{H}}$  1.36 (9H, s,  $\text{NCO}_2\text{C}(\text{CH}_3)_3$ ), 3.43 (2H, m, 2C1-H), 4.10 (2H, t, 2C2-H,  $J=4.98$ ), 5.24 (1H, br, s, NH), 6.73 (1H, ddd, ArCH,  $J=9.2, 9.12, 7.7$ ), 7.15 (1H, ddd, ArCH,  $J=9.0, 5.4, 2.5$ ).  $^{13}\text{C}$  NMR (100 MHz,  $\text{CDCl}_3$ )  $\delta_{\text{C}}$  28.4 ( $\text{NCO}_2\text{C}(\text{CH}_3)_3$ ), 40.6 (C-1), 73.6 (C-2), 79.4 ( $\text{NCO}_2\text{C}(\text{CH}_3)_3$ ), 112.6 (d,  $J=18.3$ , ArCH), 126.7 (dd,  $J=7.5, 4.2$ , ArCH), 144.9 (dd,  $J=250.9, 14.3$ , ArC), 145.4 (d,  $J=8.2$ , ArC), 150.5 (dd,  $J=250.2, 11.3$ , ArC), 155.9 (ArC). HRMS-ES<sup>+</sup>:  $m/z$  [M+Na] calcd for  $\text{C}_{13}\text{H}_{17}\text{BrFNO}_3$ : 374.0179; found: 374.0189.

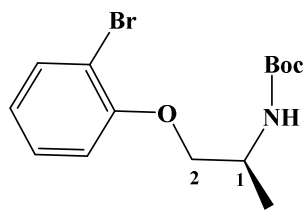

***tert*-butyl (S)-1-(2-bromophenoxy)propan-2-ylcarbamate (5e):**

colourless crystal; mp 53-55 °C;  $[\alpha]_D^{20}$  -32.20° (c=0.35, MeOH);  $\nu_{\max}/\text{cm}^{-1}$ (film) 3431 (m), 2978 (s), 2934 (m), 1715 (s), 1586 (m), 1574 (m), 1504 (s), 1483 (s), 1169 (m), 1053 (m).  $^1\text{H}$  NMR (600 MHz,  $\text{CDCl}_3$ )  $\delta_{\text{H}}$  1.32 (3H, d,  $J=6.8$  Hz, C1-CH<sub>3</sub>), 1.43 (9H, s,  $\text{NCO}_2\text{C}(\text{CH}_3)_3$ ), 3.95 (1H, s, br, C1-H), 4.07 (2H, s, br, 2C2-H), 5.01 (1H, br, s, NH), 6.80 (1H, t,  $J=7.6$  Hz, ArCH), 6.85 (1H, d,  $J=8.2$  Hz, ArCH), 7.20 (1H, t,  $J=7.7$  Hz, ArCH), 7.49 (1H, d,  $J=7.8$  Hz, ArCH);  $^{13}\text{C}$  NMR (100 MHz,  $\text{CDCl}_3$ )  $\delta_{\text{C}}$  17.9 (C1-CH<sub>3</sub>), 28.4 ( $\text{NCO}_2\text{C}(\text{CH}_3)_3$ ), 45.8 (C-1), 72.1 (C-2), 113.4 (ArCH), 122.2 (ArCH), 122.4 (ArC), 128.5 (ArCH), 133.3 (ArCH), 155.0 (s, 2C, C=O, ArC-O). The signal for the quaternary Boc carbon was not observed in the  $^{13}\text{C}$  NMR spectrum. HRMS-ES<sup>+</sup>:  $m/z$  [M+Na] calcd for  $\text{C}_{14}\text{H}_{20}\text{BrNO}_3$ : 352.0524; found: 352.0529.

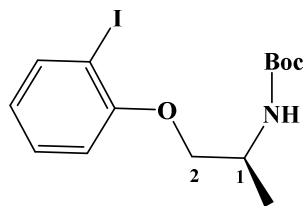

***tert*-butyl (S)-1-(2-iodophenoxy)propan-2-ylcarbamate (5f):**

colourless crystal; mp 60-62 °C;  $[\alpha]_D^{20}$  -33.7° (c=0.5, MeOH);  $\nu_{\max}/\text{cm}^{-1}$ (film) 3425 (m), 2977 (s), 2933 (m), 1715 (s), 1583 (m), 1571 (m), 1502 (m), 1366 (m), 1246 (s), 1051 (m).  $^1\text{H}$  NMR (600 MHz,  $\text{CDCl}_3$ )  $\delta_{\text{H}}$  1.36 (3H, d,  $J=6.9$  Hz, C1-CH<sub>3</sub>), 1.44 (9H, s,  $\text{NCO}_2\text{C}(\text{CH}_3)_3$ ), 3.94 (1H, s, br, C1-H), 4.10 (2H, s, br, 2C2-H), 5.0 (1H, br, s, NH), 6.68 (1H, t,  $J=7.5$  Hz, ArCH), 6.76 (1H, d,  $J=8.2$  Hz, ArCH), 7.25 (1H, m, ArCH), 7.73 (1H, dd,  $J=7.7, 1.3$ , ArCH);  $^{13}\text{C}$  NMR (100 MHz,  $\text{CDCl}_3$ )  $\delta_{\text{C}}$  18.2 (C1-CH<sub>3</sub>), 28.4 ( $\text{NCO}_2\text{C}(\text{CH}_3)_3$ ), 45.8 (C-1), 72.1 (C-2), 86.6 (ArC-I), 112.2 (ArCH), 122.8 (ArCH), 129.6 (ArCH), 139.3 (ArCH), 155.3 (s, C=O), 157.0 (ArC-O). The signal for the quaternary Boc carbon was not observed in the  $^{13}\text{C}$  NMR spectrum. HRMS-ES<sup>+</sup>:  $m/z$  [M+Na] calcd for  $\text{C}_{14}\text{H}_{20}\text{INO}_3$ : 400.0386; found: 400.0396.

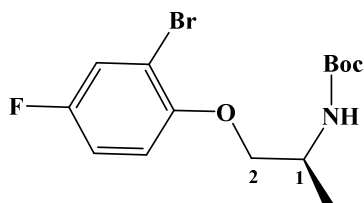

**tert-butyl (S)-1-(2-bromo-4-fluorophenoxy)propan-2-ylcarbamate (5g):**

colourless oil;  $[\alpha]_D^{20}$  -28.25° (c=0.4, MeOH);  $\nu_{\max}/\text{cm}^{-1}$ (film) 3347 (m), 2978 (m), 2934 (m), 1699 (s), 1493 (s), 1470 (m), 1392 (m), 1367 (m), 1260 (s), 1191 (s), 1046 (s).  $^1\text{H}$  NMR (400 MHz,  $\text{CDCl}_3$ )  $\delta_{\text{H}}$  1.25 (3H, d,  $J=6.7$  Hz, C1- $\text{CH}_3$ ), 1.37 (9H, s,  $\text{NCO}_2\text{C}(\text{CH}_3)_3$ ), 3.86 (2H, d,  $J=3.6$  Hz, 2C2-H), 3.98 (1H, s, C1-H), 4.82 (1H, br, s, NH), 6.75 (1H, dd,  $J=9.0, 4.7$ , ArCH), 6.87 (1H, m, ArCH), 7.19 (1H, dd,  $J=7.8, 2.9$ , ArCH);  $^{13}\text{C}$  NMR (100 MHz,  $\text{CDCl}_3$ )  $\delta_{\text{C}}$  17.9 (C1- $\text{CH}_3$ ), 28.4 ( $\text{NCO}_2\text{C}(\text{CH}_3)_3$ ), 50.5 (C-1), 72.8 (C-2), 114.0 (d,  $J=8.6$  Hz, ArCH), 114.7 (d,  $J=22.6$  Hz, ArCH), 120.4 (d,  $J=25.8$  Hz, ArCH), 158.0 (s, C=O). The signals for the quaternary carbons were not observed in the  $^{13}\text{C}$  NMR spectrum. HRMS-ES<sup>+</sup>:  $m/z$  [M+Na] calcd for  $\text{C}_{14}\text{H}_{19}\text{BrFNO}_3$ : 370.0430; found: 370.0419.

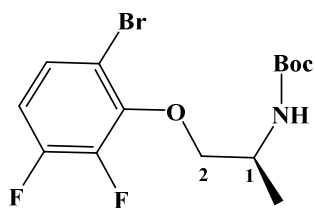

**tert-butyl (S)-1-(6-bromo-2,3-difluorophenoxy)propan-2-ylcarbamate (5h):**

colourless crystals; mp 55-57 °C;  $[\alpha]_D^{20}$  -21.7° (c=0.35, MeOH).  $\nu_{\max}/\text{cm}^{-1}$ (film) 3342 (m), 2979 (m), 2933 (m), 1713 (s), 1612 (m), 1584 (m), 1488 (s), 1391 (m), 1367 (m), 1170 (s), 1049 (s).  $^1\text{H}$  NMR (400 MHz,  $\text{CDCl}_3$ )  $\delta_{\text{H}}$  1.28 (3H, d,  $J=6.8$  Hz, C1- $\text{CH}_3$ ), 1.37 (9H, s,  $\text{NCO}_2\text{C}(\text{CH}_3)_3$ ), 3.92 (1H, s, C1-H), 4.40 (2H, s, 2C2-H), 4.89 (1H, br, s, NH), 6.74 (1H, m, ArCH), 7.18 (1H, m, ArCH);  $^{13}\text{C}$  NMR (100 MHz,  $\text{CDCl}_3$ )  $\delta_{\text{C}}$  17.6 (C1- $\text{CH}_3$ ), 28.5 ( $\text{NCO}_2\text{C}(\text{CH}_3)_3$ ), 46.5 (C-1), 77.0 (C-2), 79.4 ( $\text{NCO}_2\text{C}(\text{CH}_3)_3$ ), 111.5 (d,  $J=3.6$  Hz, ArC), 112.5 (d,  $J=18.4$  Hz, ArCH), 126.8 (dd,  $J=7.6, 4.2$  Hz, ArCH), 144.9 (dd,  $J=252.8, 14.3$  Hz, ArC), 145.6 (dd,  $J=7.9, 2.2$  Hz, ArC), 150.8 (dd,  $J=250.3, 11.4$  Hz, ArC), 155.3 (s, C=O). HRMS-ES<sup>+</sup>:  $m/z$  [M+Na] calcd for  $\text{C}_{14}\text{H}_{18}\text{BrF}_2\text{NO}_3$ : 388.0336; found: 388.0335.



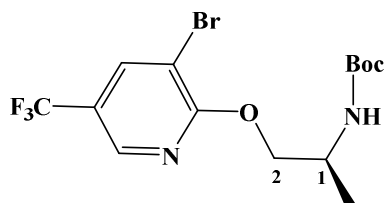

***tert*-butyl (S)-1-((3-bromo-5-(trifluoromethyl)pyridin-2-yl)oxy)propan-2-yl carbamate (5i):**

white powder; mp 68-70 °C;  $[\alpha]_D^{20}$  -21.83° (c=0.35, MeOH);  $\nu_{\max}/\text{cm}^{-1}$ (film) 3348 (m), 2979 (m), 2934 (m), 1704 (s), 1604 (m), 1482 (s), 1367 (m), 1320 (m), 1162 (s), 1055 (s).  $^1\text{H}$  NMR (400 MHz,  $\text{CDCl}_3$ )  $\delta_{\text{H}}$  1.22 (3H, d,  $J=6.8$  Hz, C1- $\text{CH}_3$ ), 1.37 (9H, s,  $\text{NCO}_2\text{C}(\text{CH}_3)_3$ ), 4.07 (1H, s, C1- $\text{H}$ ), 4.31 (2H, m, 2C2- $\text{H}$ ), 4.66 (1H, br, s, NH), 7.94 (1H, d.,  $J=1.7$  Hz, Ar $\text{CH}$ ), 8.27 (1H, s, Ar $\text{CH}$ );  $^{13}\text{C}$  NMR (100 MHz,  $\text{CDCl}_3$ )  $\delta_{\text{C}}$  17.8 (C1- $\text{CH}_3$ ), 28.4 ( $\text{NCO}_2\text{C}(\text{CH}_3)_3$ ), 45.5 ( $\text{C}-1$ ), 70.7 ( $\text{C}-2$ ), 107.4 (Ar $\text{C}$ ), 121.4 (q,  $J=33.4$  Hz, Ar $\text{C}$ ), 123.0 (q,  $J=271.6$  Hz,  $\text{CF}_3$ ), 138.6 (q,  $J=3.1$  Hz, Ar $\text{CH}$ ), 143.2 (q,  $J=4.3$  Hz, Ar $\text{CH}$ ), 155.2 (C=O), 161.7 (Ar $\text{C}-\text{O}$ ). HRMS- $\text{ES}^+$ :  $m/z$  [M+Na] calcd for  $\text{C}_{14}\text{H}_{18}\text{BrF}_3\text{N}_2\text{O}_3$ : 421.0351; Found: 421.0363.

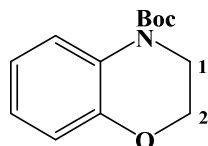

***tert*-butyl 2,3-dihydro-4*H*-benzo[*b*][1,4]oxazine-4-carboxylate (6a):**

colourless oil;  $\nu_{\max}/\text{cm}^{-1}$ (film) 2977 (s), 2932 (s), 1705 (s), 1605 (m), 1586 (m), 1497 (m), 1380 (s), 1148 (s), 1062 (s);  $^1\text{H}$  NMR (400 MHz,  $\text{CDCl}_3$ )  $\delta_{\text{H}}$  1.47 (9H, s,  $\text{NCO}_2\text{C}(\text{CH}_3)_3$ ), 3.78 (2H, t,  $J=4.5$  Hz, 2C1- $\text{H}$ ), 4.17 (2H, t,  $J=4.4$  Hz, 2C2- $\text{H}$ ), 6.80 (2H, m, Ar $\text{CH}$ ), 6.90 (1H, m, Ar $\text{CH}$ ), 7.70 (1H, m, Ar $\text{CH}$ );  $^{13}\text{C}$  NMR (100 MHz,  $\text{CDCl}_3$ )  $\delta_{\text{C}}$  28.3 ( $\text{NCO}_2\text{C}(\text{CH}_3)_3$ ), 42.1 ( $\text{C}-1$ ), 65.6 ( $\text{C}-2$ ), 81.6 ( $\text{NCO}_2\text{C}(\text{CH}_3)_3$ ), 117.0 (Ar $\text{CH}$ ), 120.2 (Ar $\text{CH}$ ), 123.5 (Ar $\text{CH}$ ), 124.4 (Ar $\text{CH}$ ), 145.9 (Ar $\text{C}-\text{O}$ ). The resonances for the C=O group and the aromatic C-N were not observed in  $^{13}\text{C}$  NMR spectrum. The spectroscopic properties of this compound were consistent with the data available in the literature.<sup>2</sup>

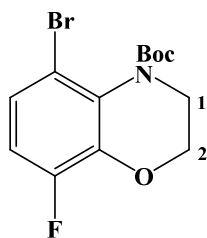

***tert*-butyl 5-bromo-8-fluoro-2,3-dihydro-4*H*-benzo[*b*][1,4]oxazine-4-carboxylate (6c):**

colourless crystal;  $\nu_{\max}/\text{cm}^{-1}$ (film) 2979 (s), 2936 (s), 2890 (m), 1713 (s), 1609 (m), 1582 (m), 1483 (s), 1368 (s), 1161 (s), 1043 (s);  $^1\text{H}$  NMR (400 MHz,  $\text{CDCl}_3$ )  $\delta_{\text{H}}$  1.41 (9H, s,  $\text{NCO}_2\text{C}(\text{CH}_3)_3$ ), 4.15 (2H, m, 2C1-H), 4.40 (2H, br, 2C2-H), 6.75 (1H, dd, ArCH,  $J=10.1, 8.9$ ), 6.99 (1H, dd, ArCH,  $J=8.8, 5.0$ );  $^{13}\text{C}$  NMR (100 MHz,  $\text{CDCl}_3$ )  $\delta_{\text{C}}$  28.0 ( $\text{NCO}_2\text{C}(\text{CH}_3)_3$ ), 66.6 (C-1), 68.1 (C-2), 82.5 ( $\text{NCO}_2\text{C}(\text{CH}_3)_3$ ), 113.6 (d,  $J=19.0$ , ArCH), 115.0 (d,  $J=3.5$ , ArC), 123.0 (d,  $J=7.4$  ArCH), 150.9 (d,  $J=246$ , ArCF). The resonances for the C=O group and the quaternary aromatic C-O carbon were not observed in  $^{13}\text{C}$  NMR spectrum. The sample did not ionise properly and as such a HRMS could not be obtained.

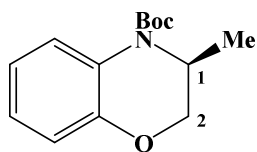

***tert*-butyl (*S*)-3-methyl-2,3-dihydro-4*H*-benzo[*b*][1,4]oxazine-4-carboxylate (6d):**

colourless oil;  $[\alpha]_{\text{D}}^{20} -26.6^\circ$  ( $c=0.18$ , MeOH);  $\nu_{\max}/\text{cm}^{-1}$ (film) 2976 (s), 2930 (s), 2876 (m), 1698 (s), 1605 (m), 1585 (m), 1496 (s), 1368 (m), 1171 (m), 1064 (m).  $^1\text{H}$  NMR (600 MHz,  $\text{CDCl}_3$ )  $\delta_{\text{H}}$  1.34 (3H, d,  $J=6.8$  Hz, C1-CH<sub>3</sub>), 1.47 (9H, s,  $\text{NCO}_2\text{C}(\text{CH}_3)_3$ ), 4.04 (1H, d,  $J=2.0$  Hz, C1-H), 4.60 (2H, m, 2C2-H), 6.81 (2H, m, 2ArCH), 6.89 (1H, m, ArCH), 7.78 (1H, m, ArCH);  $^{13}\text{C}$  NMR (100 MHz,  $\text{CDCl}_3$ )  $\delta_{\text{C}}$  15.6 (C1-CH<sub>3</sub>), 28.4 ( $\text{NCO}_2\text{C}(\text{CH}_3)_3$ ), 46.2 (C-1), 69.0 (C-2), 81.5 ( $\text{NCO}_2\text{C}(\text{CH}_3)_3$ ), 116.7 (ArCH), 120.5 (ArCH), 123.7 (ArCH), 123.9 (ArCH). The resonances for the C=O and quaternary aromatic C-O and C-N carbons were not observed in  $^{13}\text{C}$  NMR spectrum. The  $^1\text{H}$  and  $^{13}\text{C}$  NMR data were consistent with that available in the literature.<sup>2</sup>

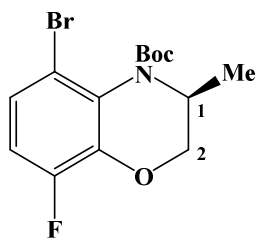

***tert*-butyl (S)-5-bromo-8-fluoro-3-methyl-2,3-dihydro-4*H*-benzo[*b*][1,4]oxazine-4-carboxylate (6f):**

colourless oil;  $[\alpha]_D^{20}$  - 25.5° (c = 0.2, CHCl<sub>3</sub>).  $\nu_{\max}/\text{cm}^{-1}$ (film) 2979 (m), 2935 (m), 2889 (m), 1712 (s), 1608 (m), 1585 (m), 1450 (m), 1369 (m), 1171 (m), 1033 (m). <sup>1</sup>H NMR (400 MHz, CDCl<sub>3</sub>)  $\delta_{\text{H}}$  1.10 (3H, d,  $J$  = 7.2 Hz, C1-CH<sub>3</sub>), 1.47 (9H, s, NCO<sub>2</sub>C(CH<sub>3</sub>)<sub>3</sub>), 4.19 (2H, m, C2-H), 4.78 (1H, br s, C1-H), 6.83 (1H, m, ArCH), 7.07 (1H, m, ArCH); <sup>13</sup>C NMR (100 MHz, CDCl<sub>3</sub>)  $\delta_{\text{C}}$  15.5 (C1-CH<sub>3</sub>), 28.1 (NCO<sub>2</sub>C(CH<sub>3</sub>)<sub>3</sub>), 45.9 (C-1), 70.3 (C-2), 82.5 (NCO<sub>2</sub>C(CH<sub>3</sub>)<sub>3</sub>), 113.6 (d,  $J$  = 18.9 Hz, ArCH), 116.3 (s, ArC), 123.4 (d,  $J$  = 7.3 Hz, ArCH), 150.6 (d,  $J$  = 245.8, ArCF). The resonances for the C=O group and the quaternary aromatic C-O carbon were not observed in <sup>13</sup>C NMR spectrum. The sample did not ionise properly and as such a HRMS could not be obtained. Elemental Anal. Calcd. for C<sub>14</sub>H<sub>17</sub>BrFNO<sub>3</sub>: C, 48.57; H, 4.95; N, 4.05%. Found: C, 48.75; H, 4.68; N, 3.98%. To confirm the structure of **6e** we deprotected it and were able to obtain HRMS data for the deprotected structure (presented below).

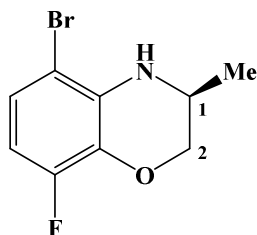

**(S)-5-bromo-8-fluoro-3-methyl-3,4-dihydro-2*H*-benzo[*b*][1,4]oxazine (6f deprotected):**

colourless oil;  $[\alpha]_D^{20}$  +13.5° (c = 0.2, CHCl<sub>3</sub>). <sup>1</sup>H NMR (400 MHz, CDCl<sub>3</sub>)  $\delta_{\text{H}}$  1.28 (3H, d,  $J$  = 6.4 Hz, C1-CH<sub>3</sub>), 3.63 (1H, m, C1-H), 3.80 (1H, dd,  $J$  = 10.4, 7.8 Hz, C2-H), 4.26 (1H, br NH), 4.29 (1H, m, C2-H), 6.42 (1H, m, ArCH), 6.95 (1H, m, ArCH); <sup>13</sup>C NMR (150 MHz, CDCl<sub>3</sub>)  $\delta_{\text{C}}$  17.6 (C1-CH<sub>3</sub>), 45.3 (C-1), 70.4 (C-2), 102.9 (ArC, d, 2.2 Hz), 103.7 (d,  $J$  = 19.9 Hz, ArCH), 123.2 (d,

$J = 8.6$  Hz, ArCH), 132.2 (d,  $J = 14.9$  Hz, ArC), 133.2 (d,  $J = 4.4$  Hz, ArC), 151.0 (d,  $J = 242.2$  , ArCF). HRMS-ES<sup>+</sup>:  $m/z$  [M+H] calcd for C<sub>9</sub>H<sub>10</sub>NOFBr: 245.9930; found: 245.9931.

## References

1. J. F. Bower, P. Szeto and T. Gallagher, *Org. Lett.*, 2007, **9**, 3283-3286.
2. P. Jangili, J. Kashanna and B. Das, *Tetrahedron Lett.*, 2013, **54**, 3453-3456.

## NMR spectra

### $^1\text{H}$ NMR spectra of 5a

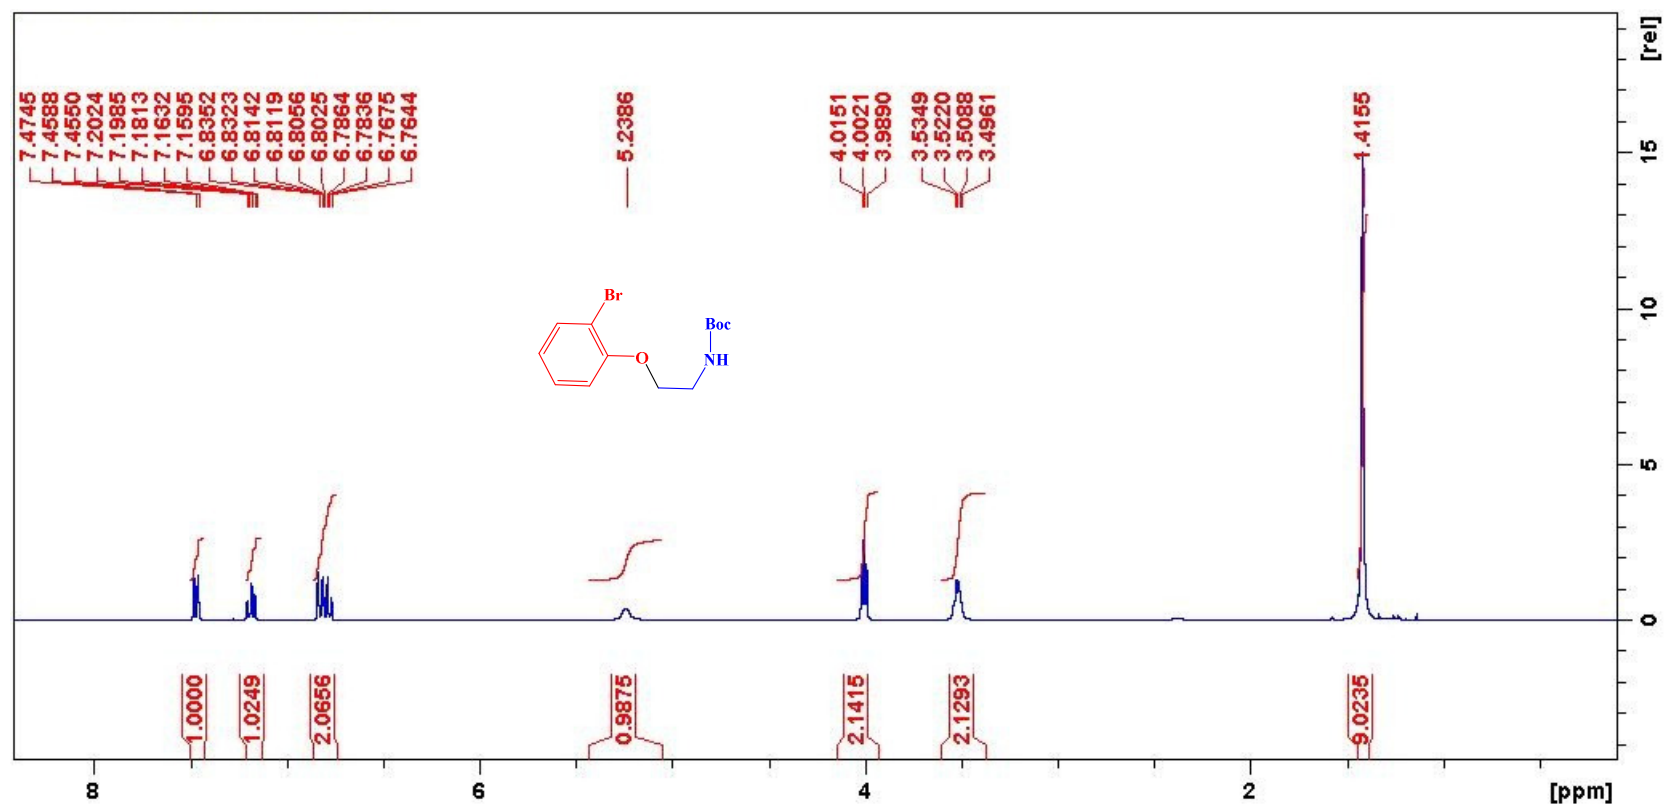

<sup>13</sup>C NMR spectra of 5a

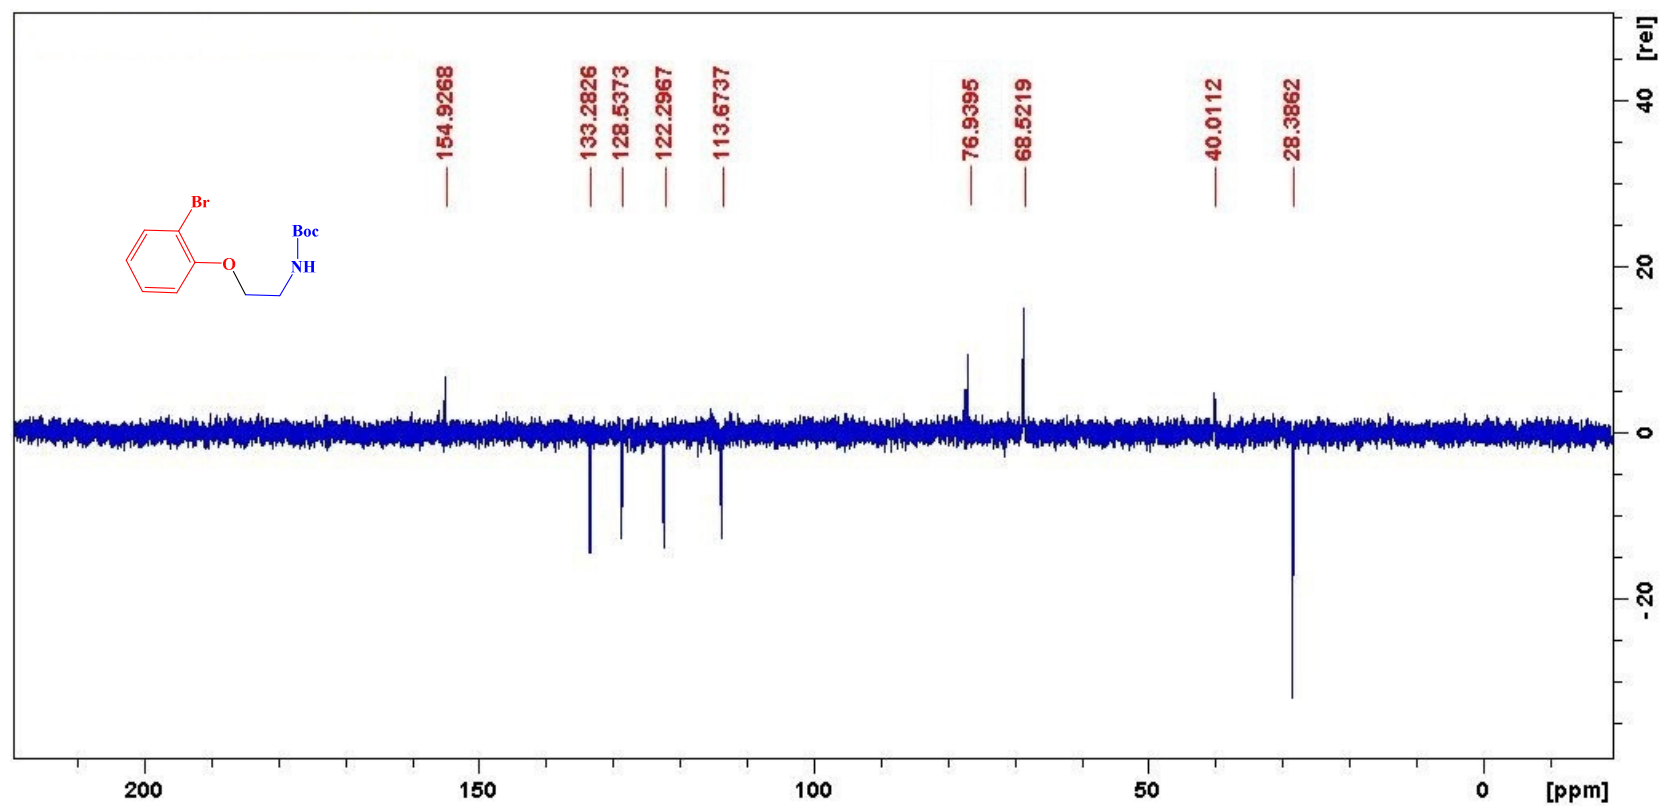

# <sup>1</sup>H NMR spectra of 5b

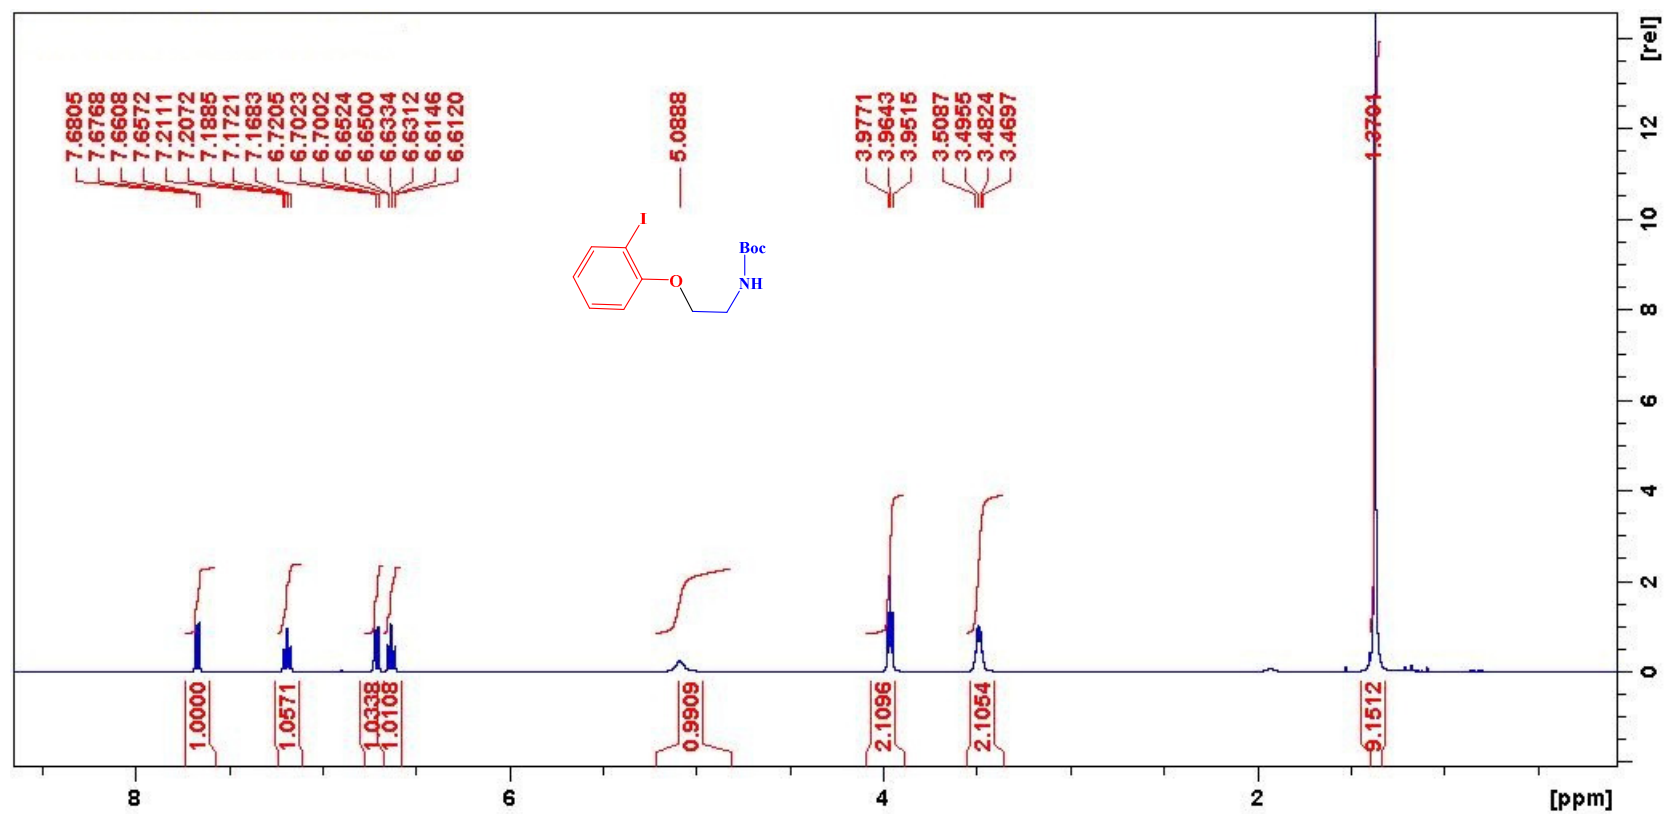

<sup>13</sup>C NMR spectra of 5b

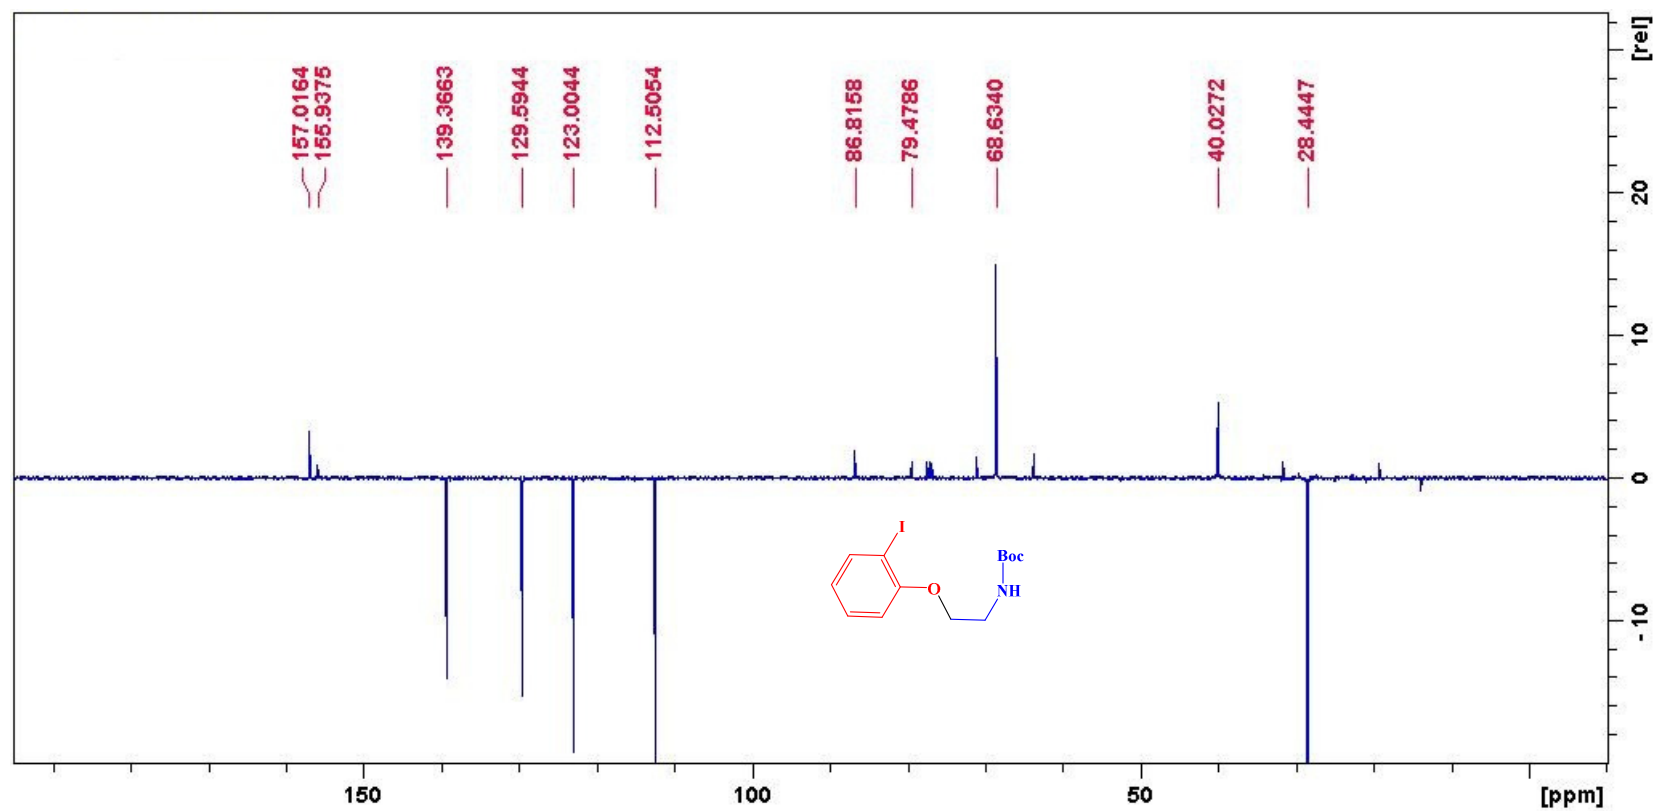



# <sup>1</sup>H NMR spectra of 5c

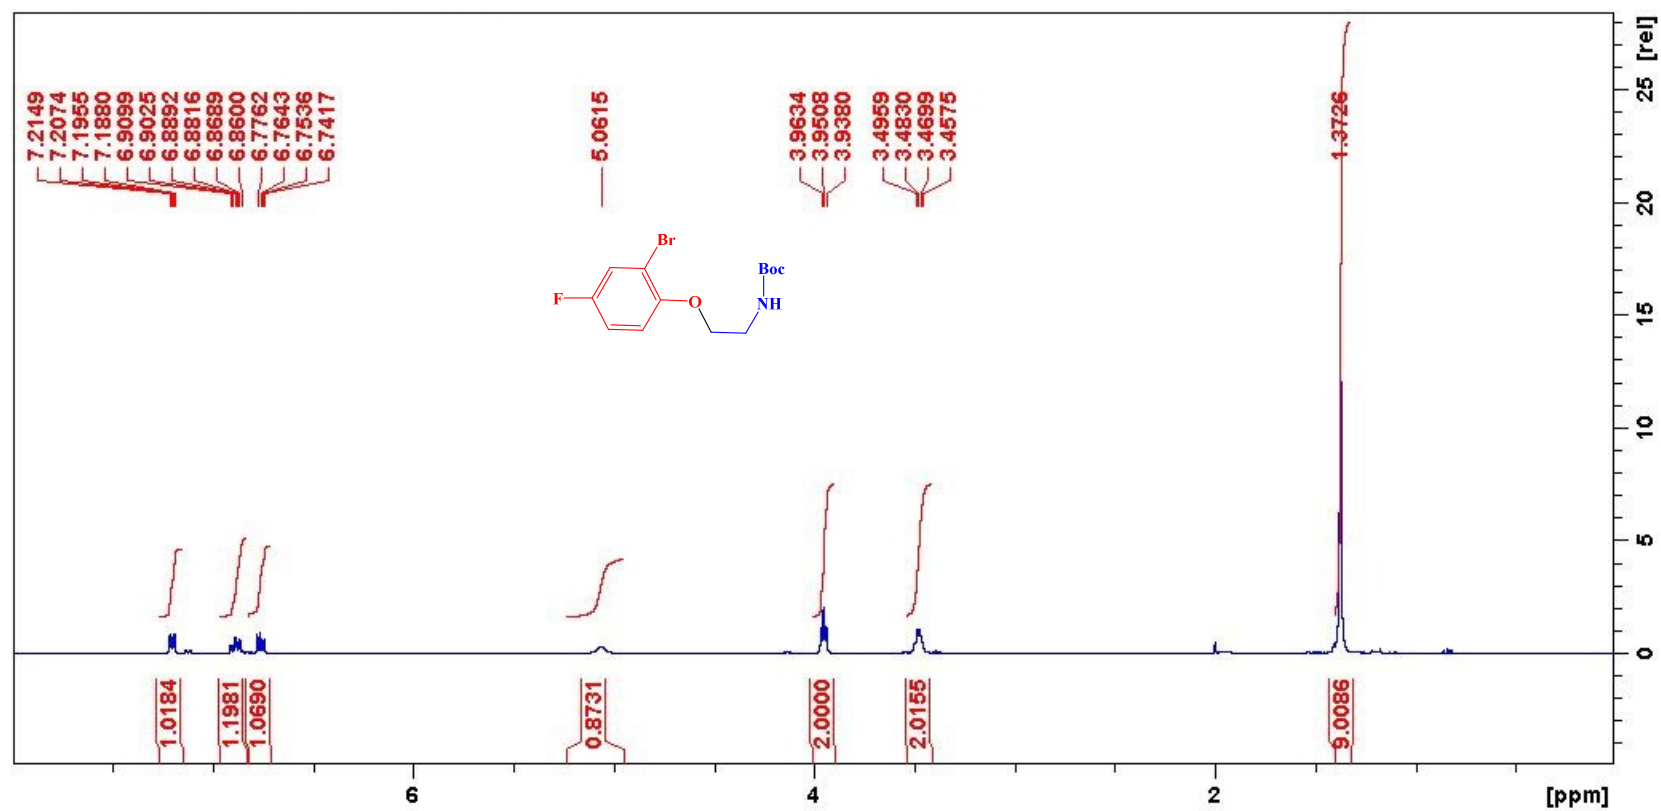

<sup>13</sup>C NMR spectra of 5c

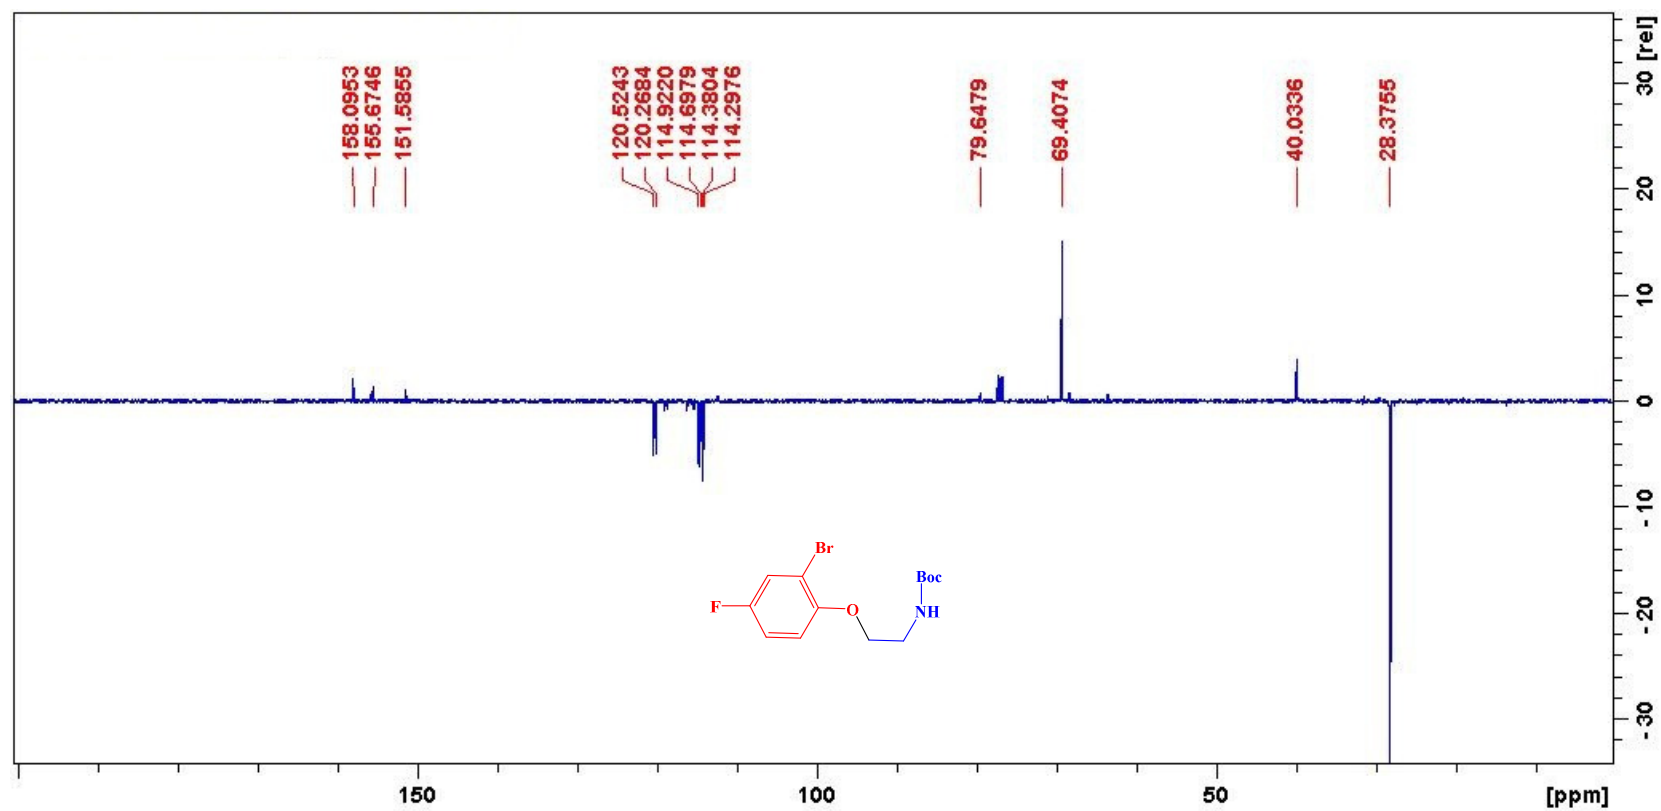

$^1\text{H}$  NMR spectra of **5d**

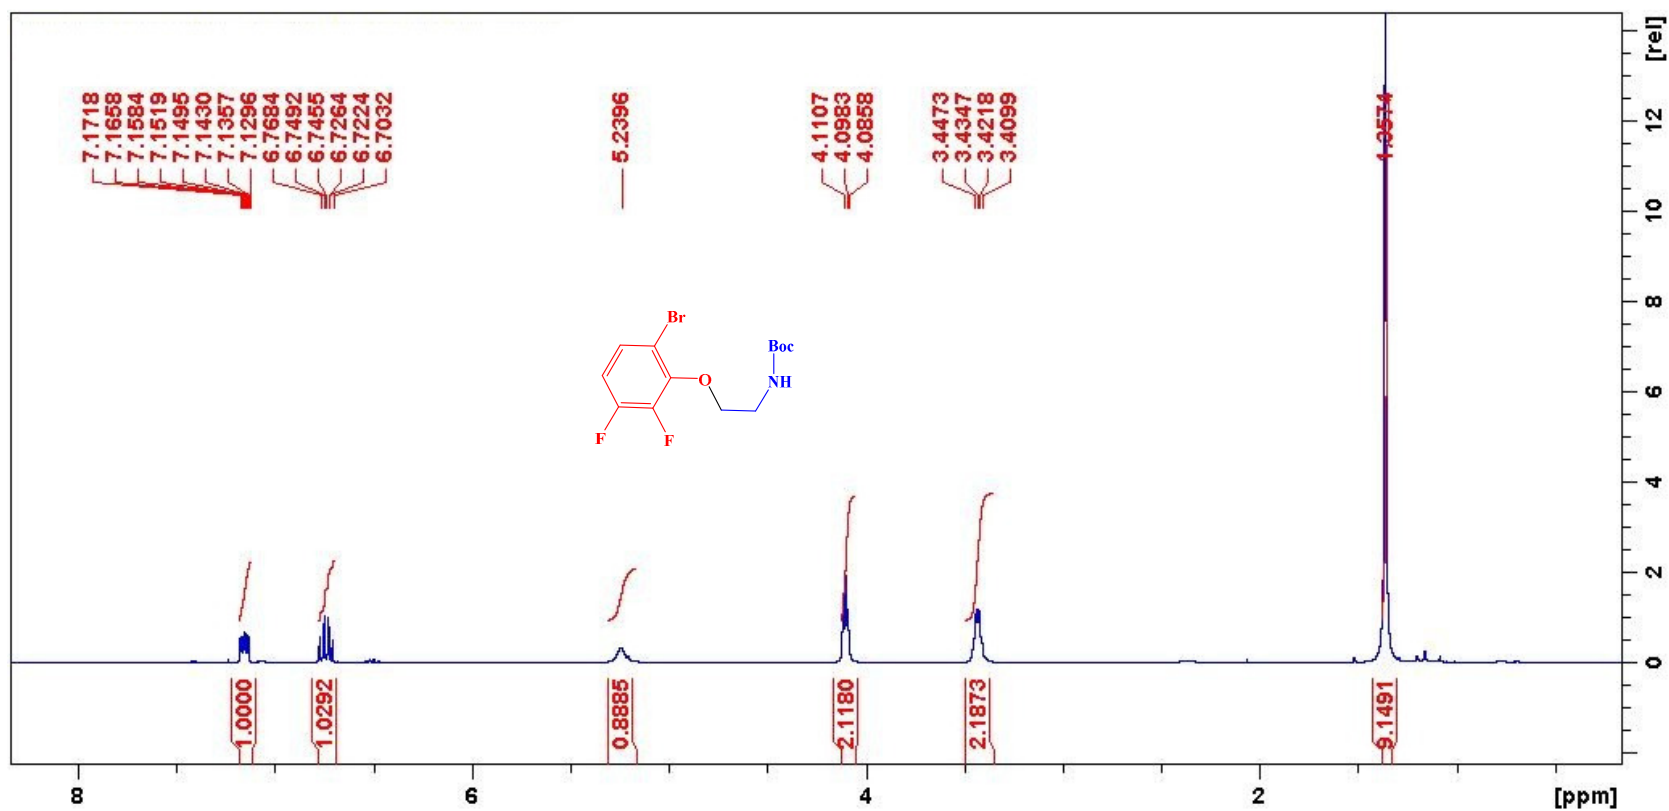

$^{13}\text{C}$  NMR spectra of **5d**

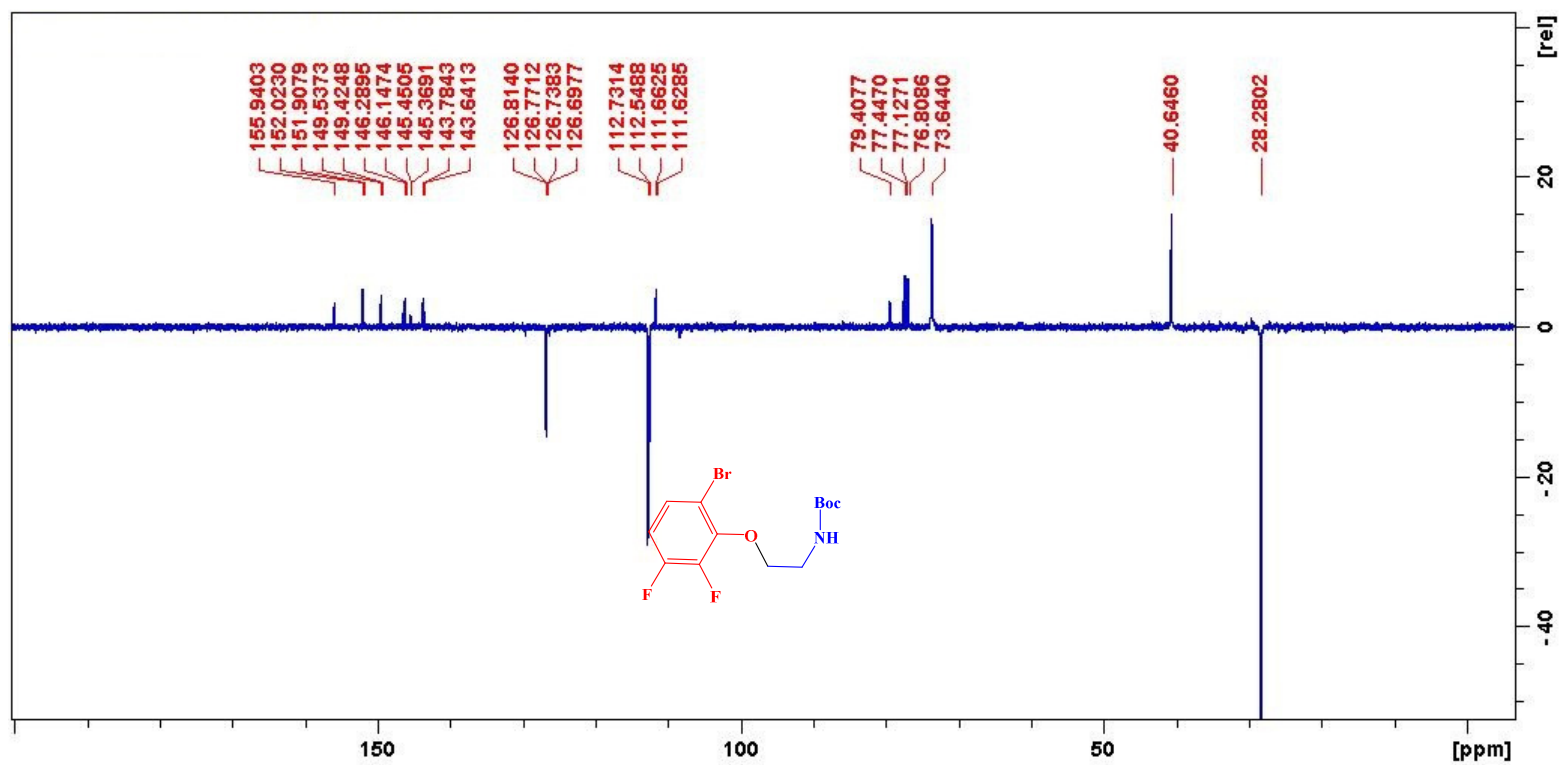

HSQC spectra of **5d**

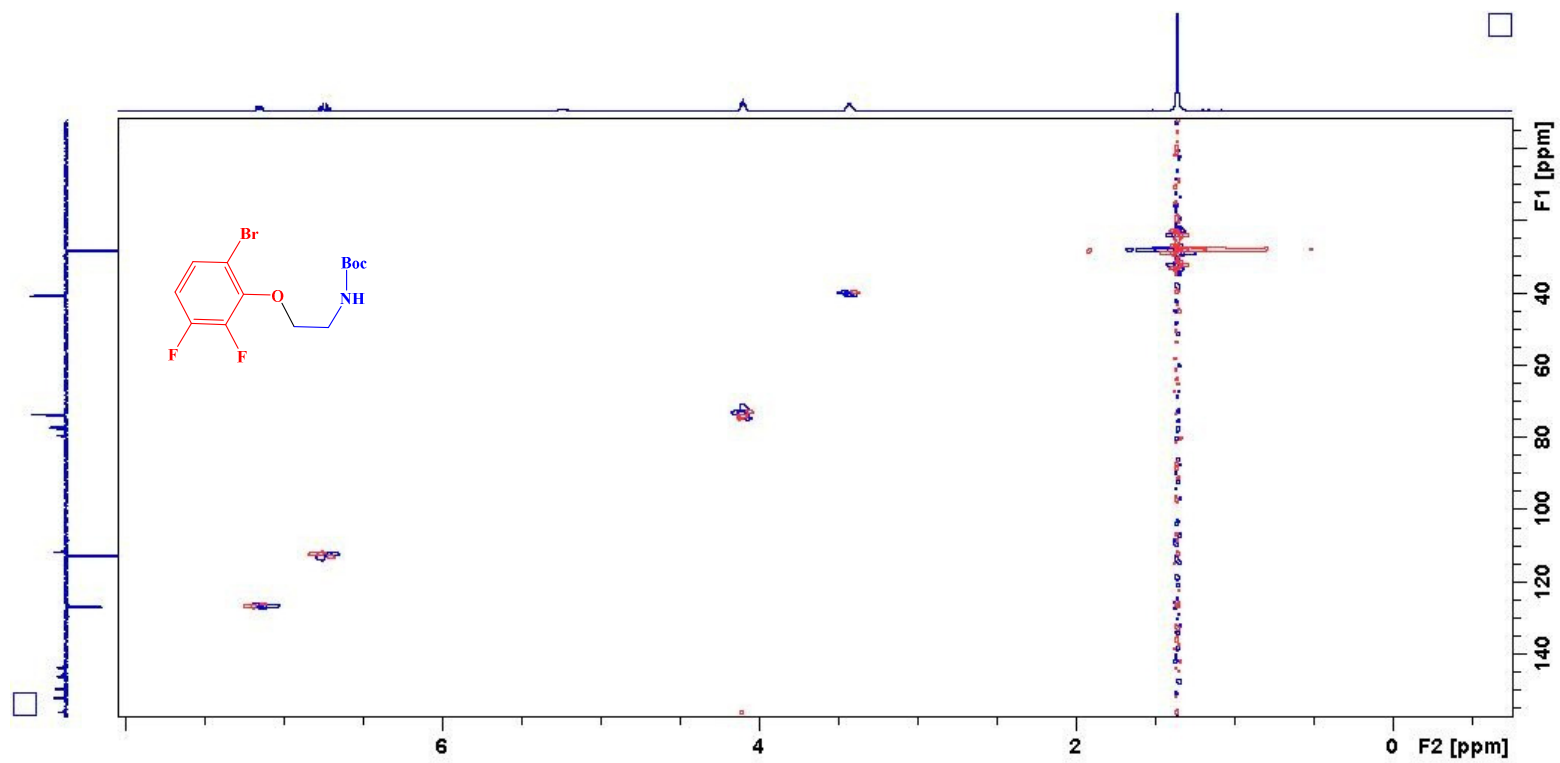

# HMBC spectra of **5d**

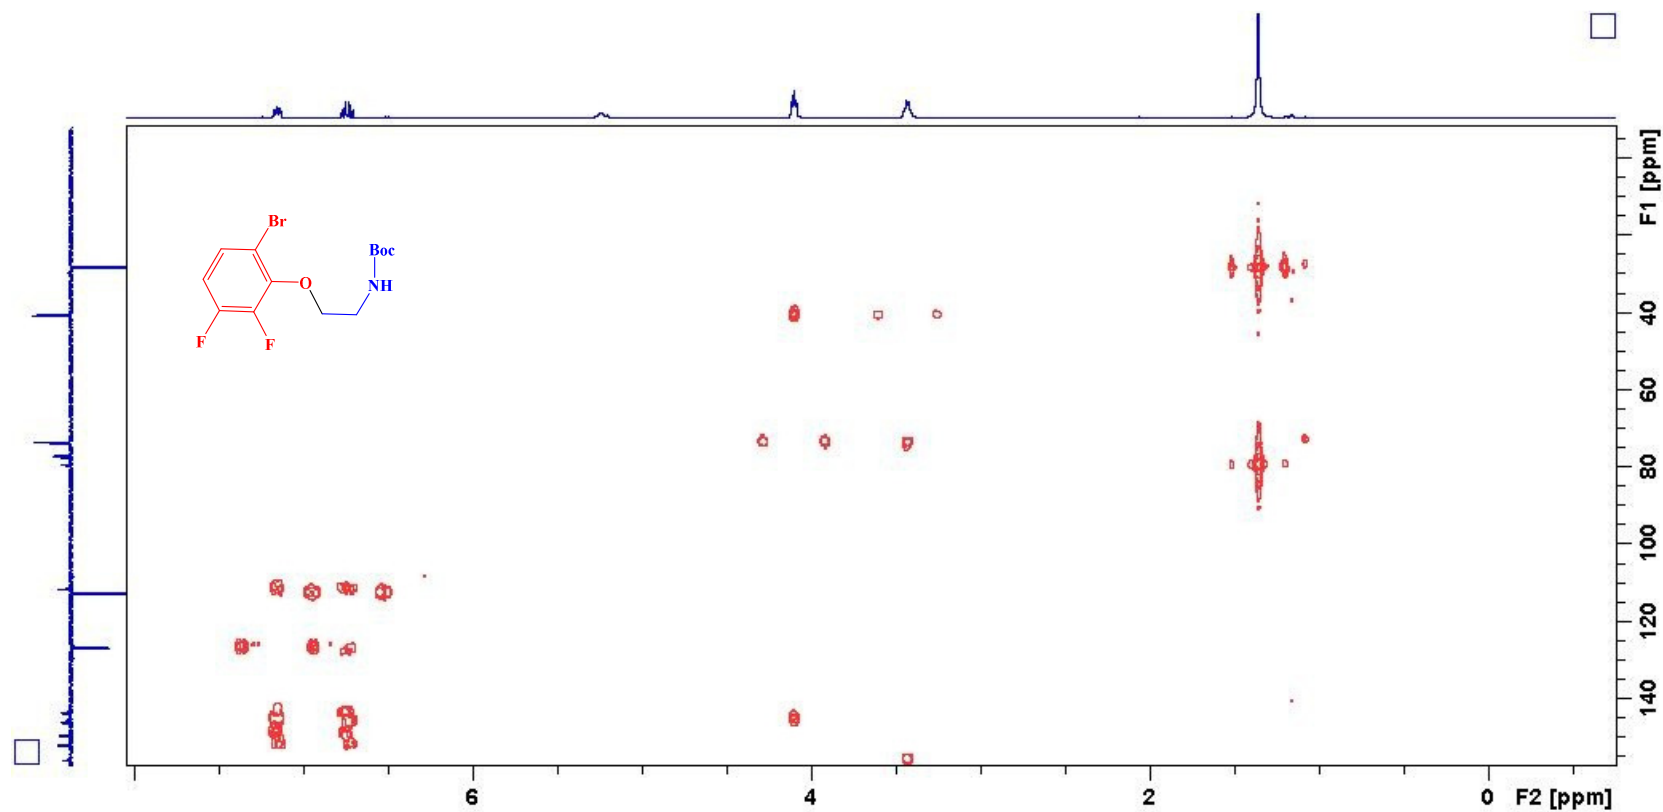

<sup>1</sup>H NMR spectra of **5e**

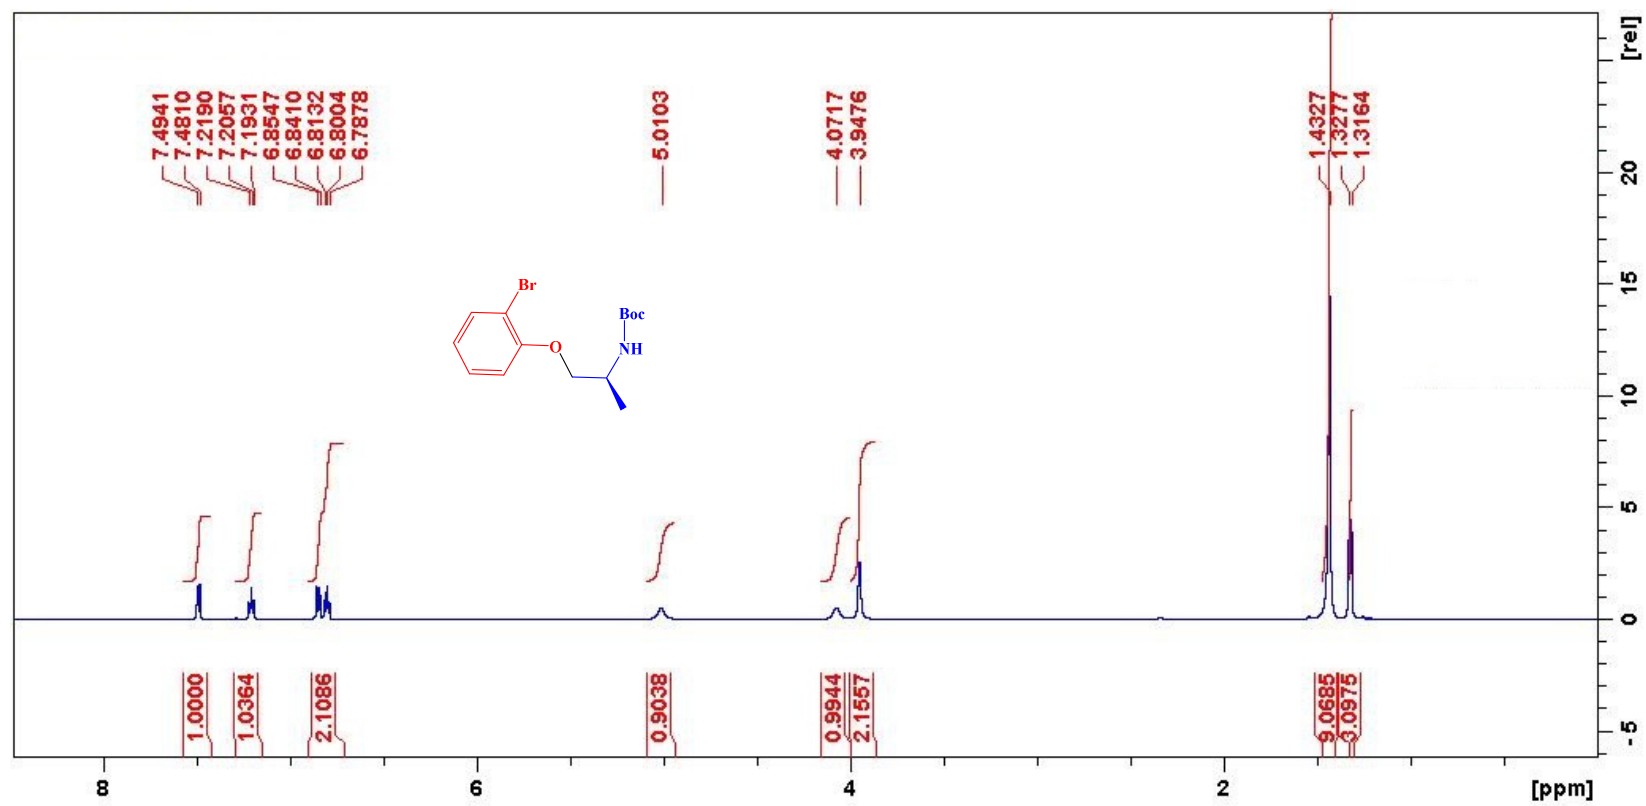

<sup>13</sup>C NMR spectra of 5e

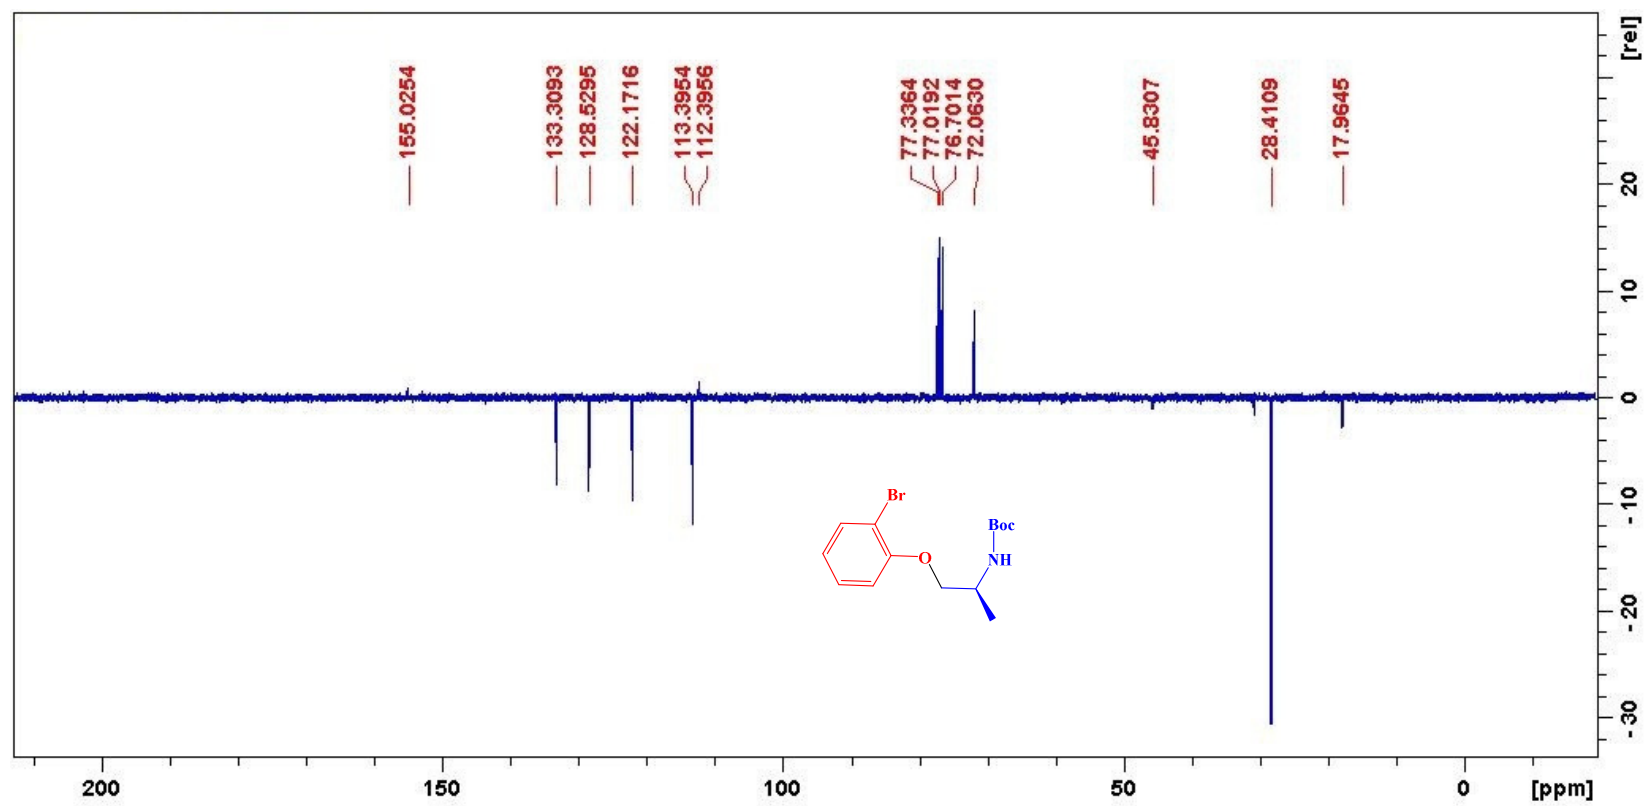



# <sup>1</sup>H NMR spectra of 5f

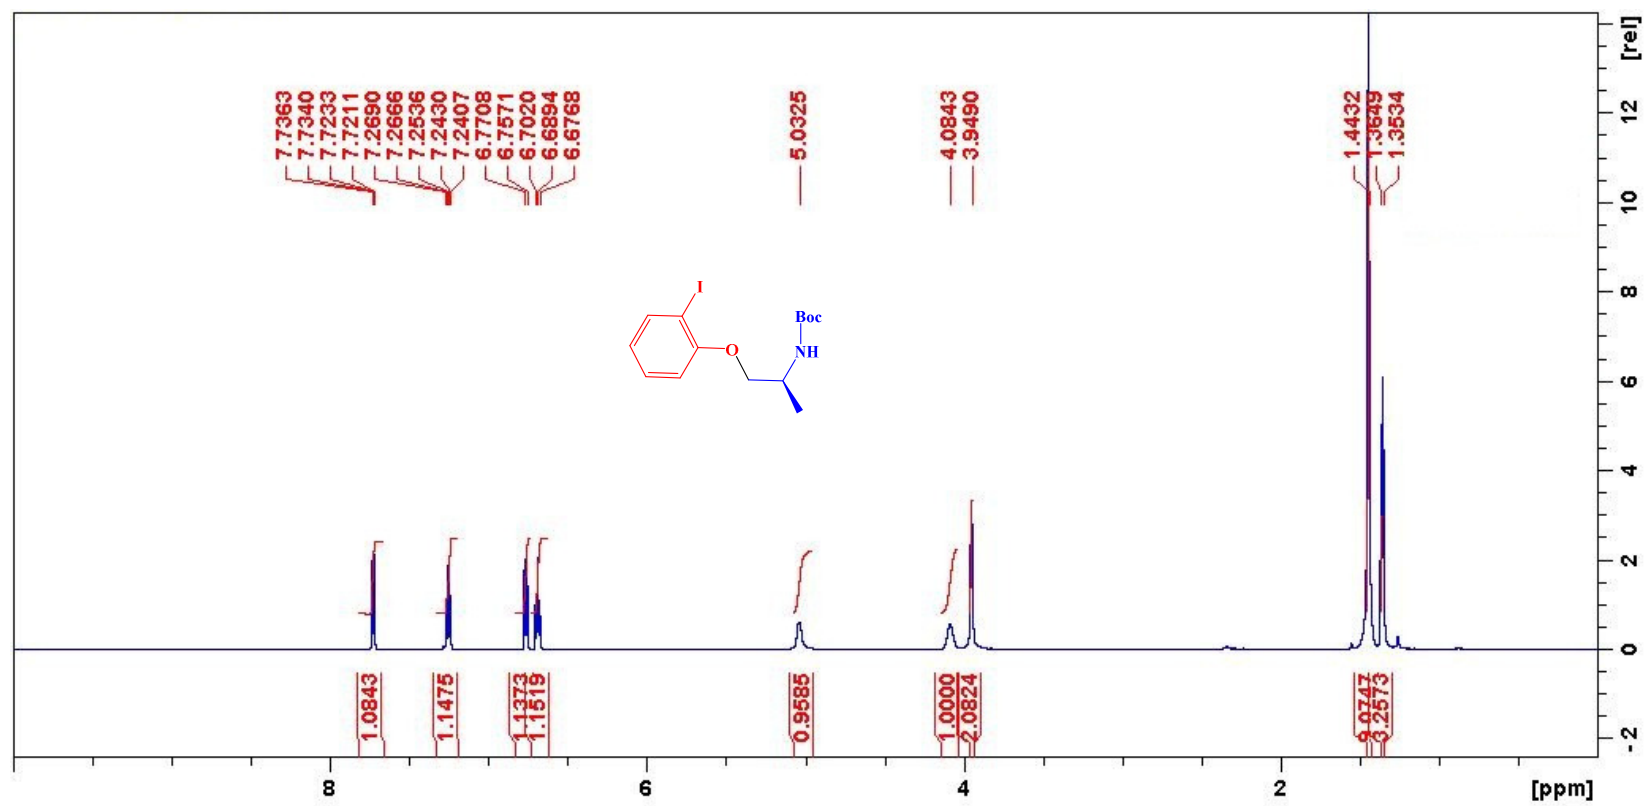

<sup>13</sup>C NMR spectra of 5f

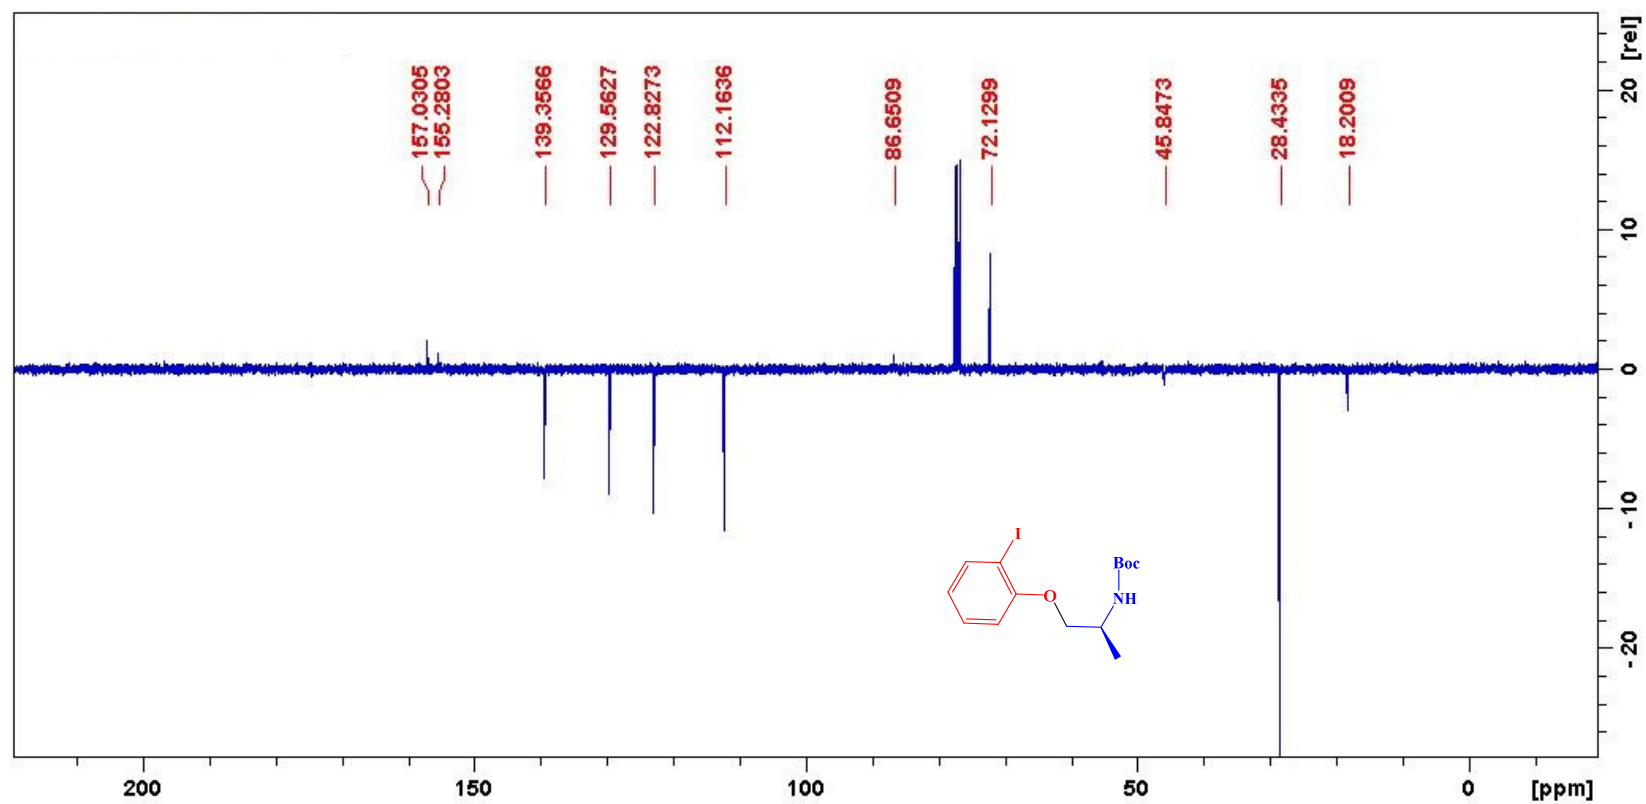

# <sup>1</sup>H NMR spectra of 5g

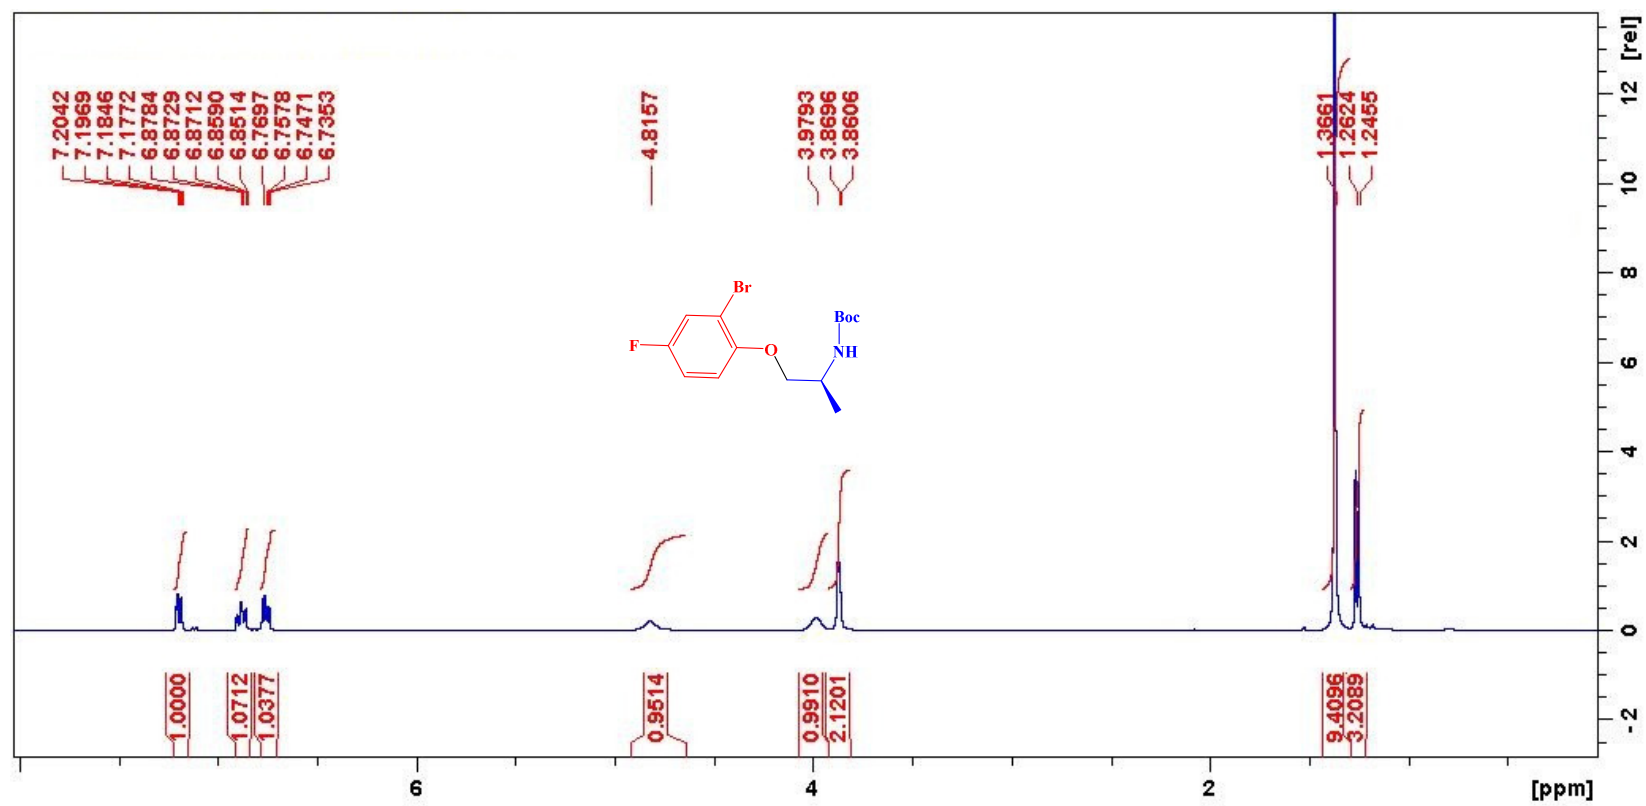

<sup>13</sup>C NMR spectra of 5g

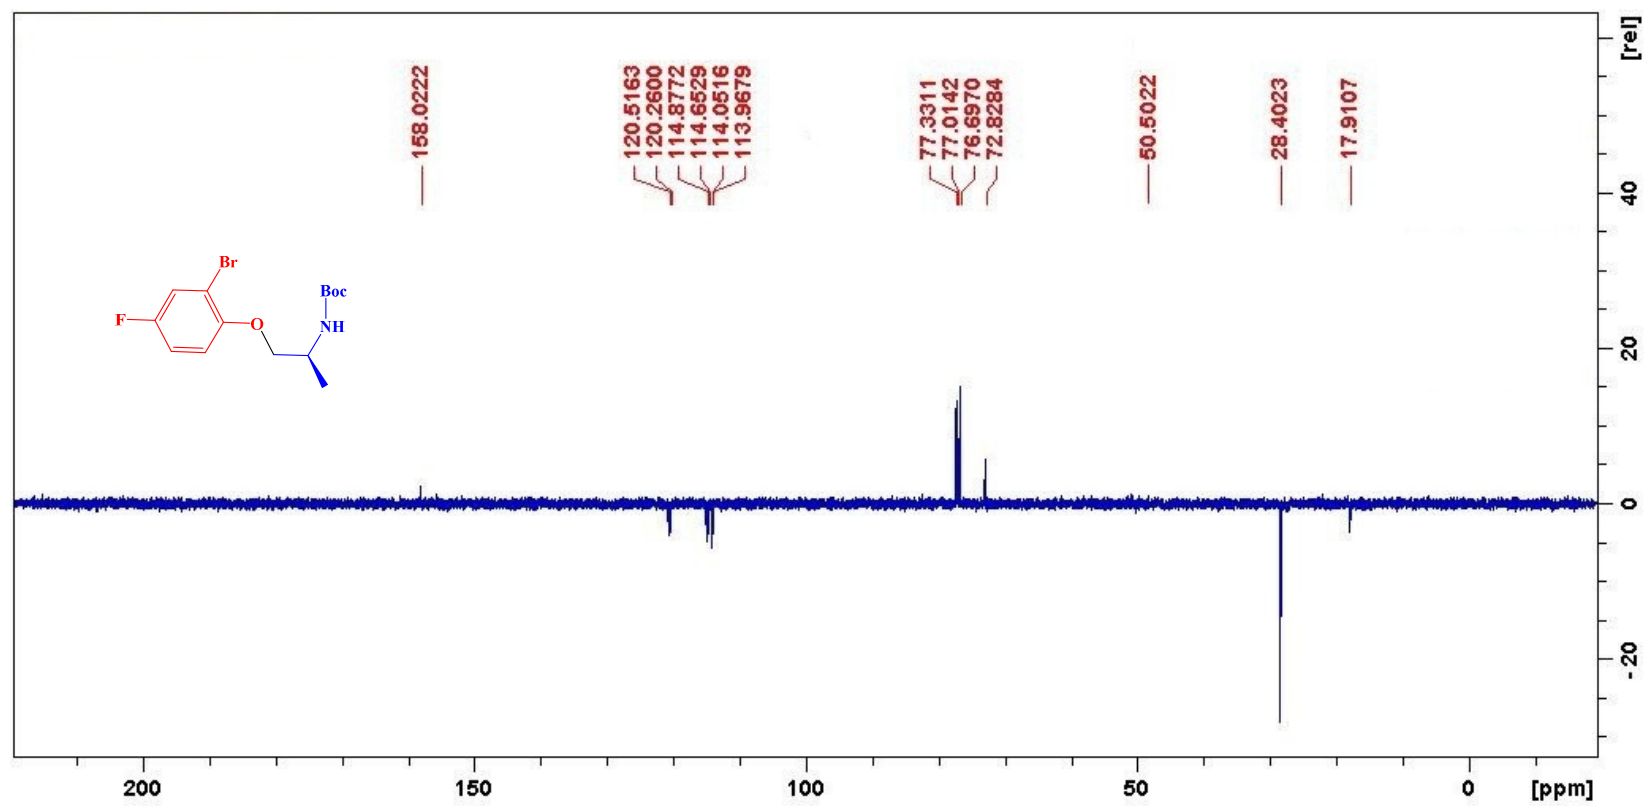

<sup>1</sup>H NMR spectra of 5h

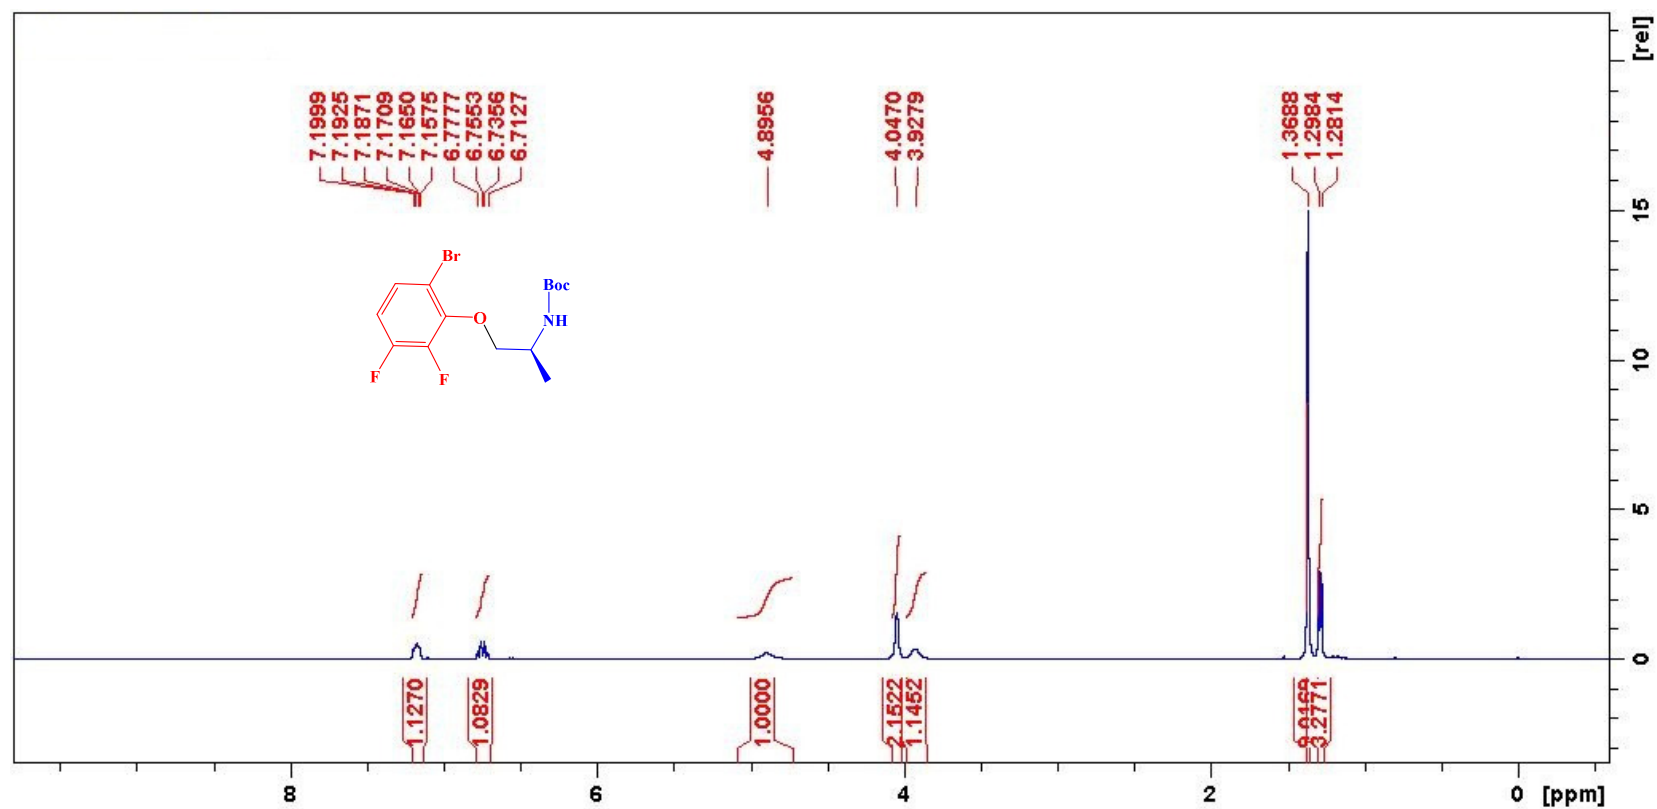

<sup>13</sup>C NMR spectra of 5h

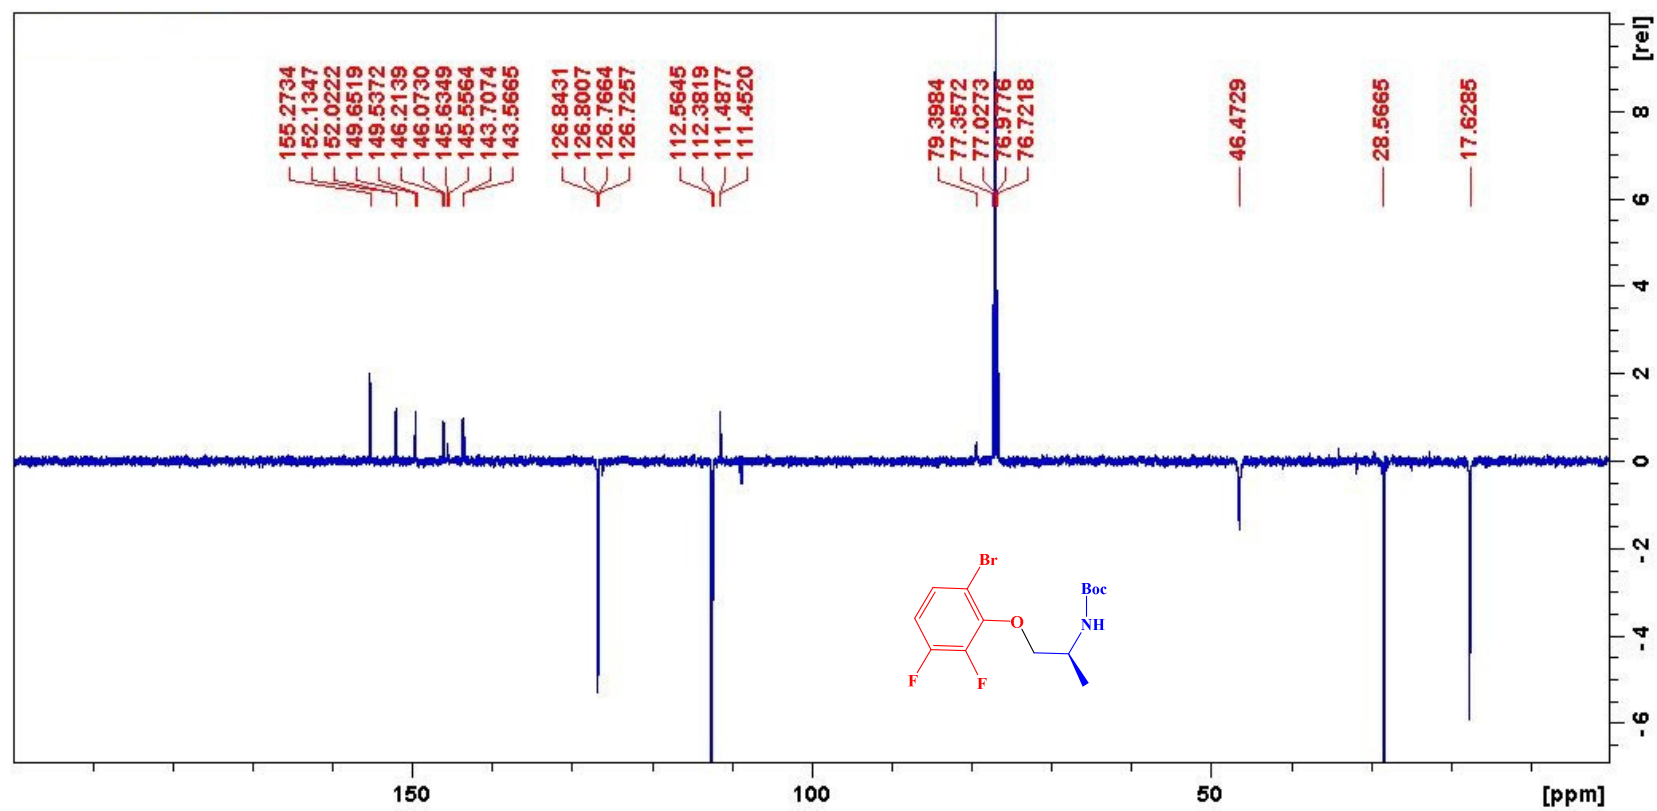

**$^{19}\text{F}$  NMR spectra of 5h**

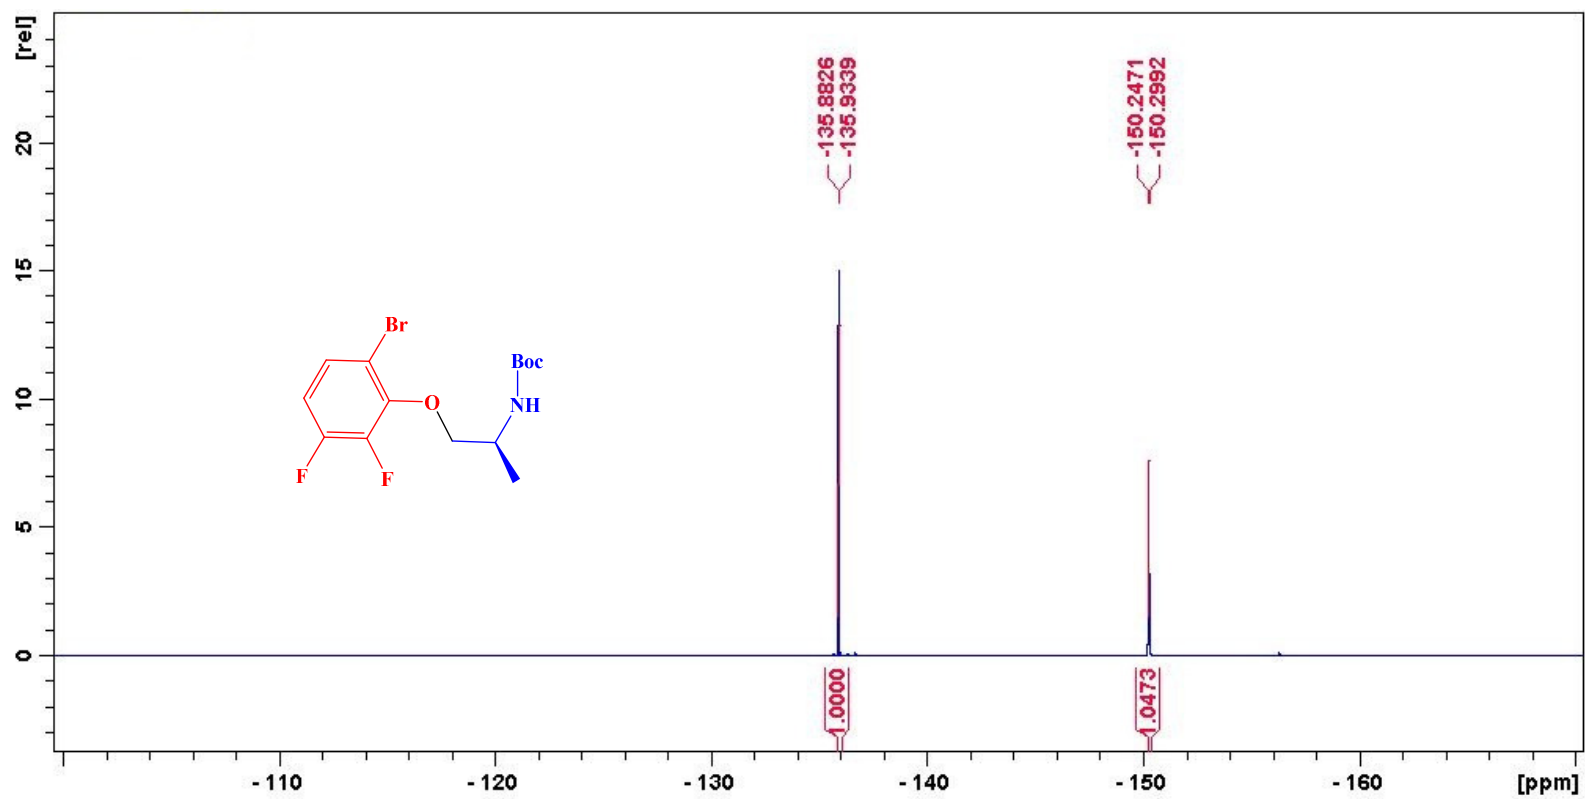

# <sup>1</sup>H NMR spectra of 5i

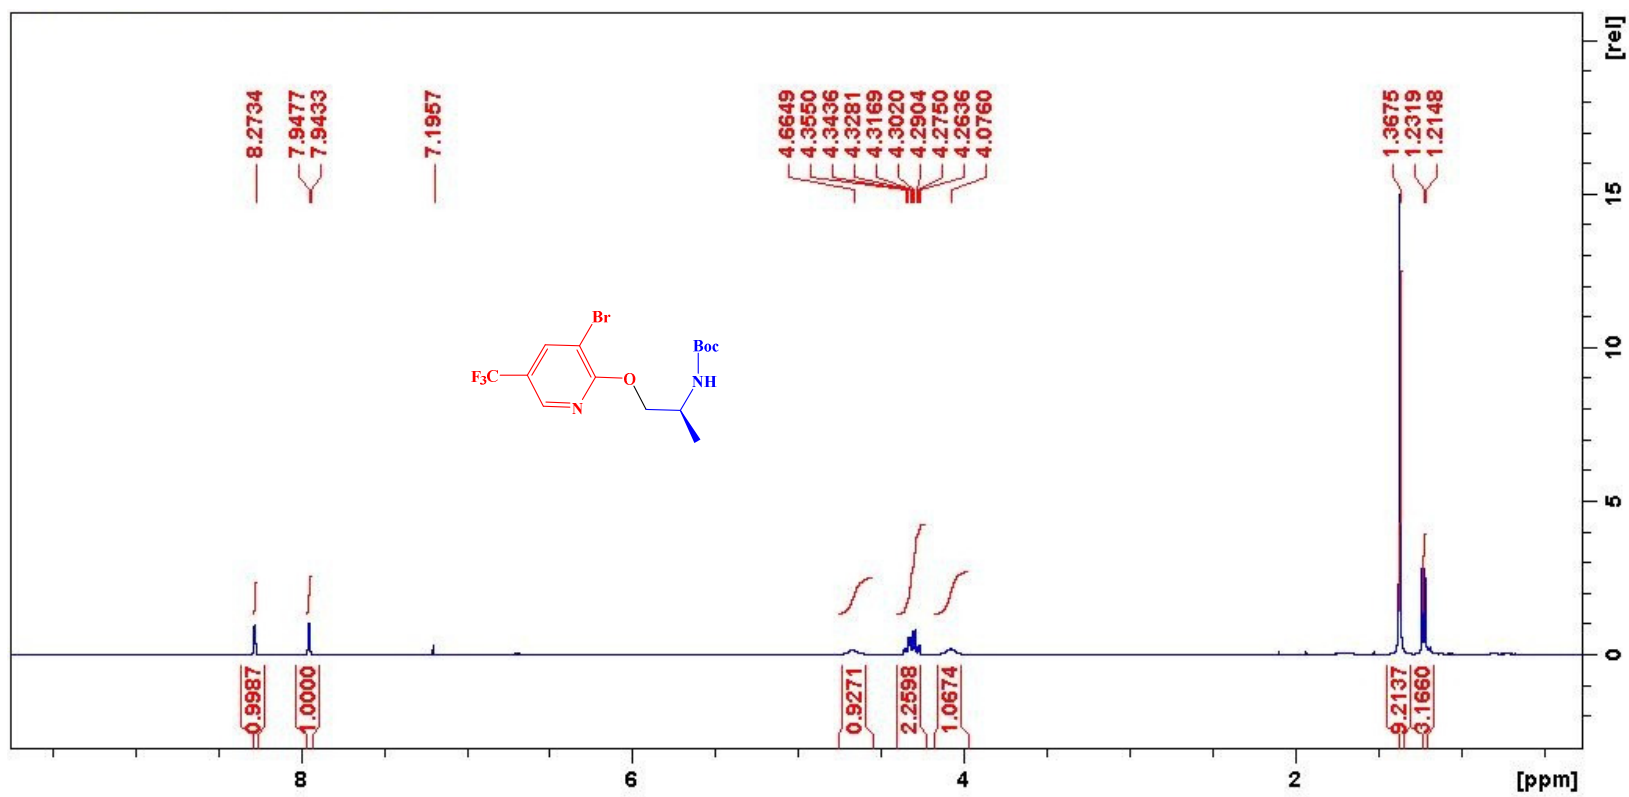



<sup>13</sup>C NMR spectra of 5i

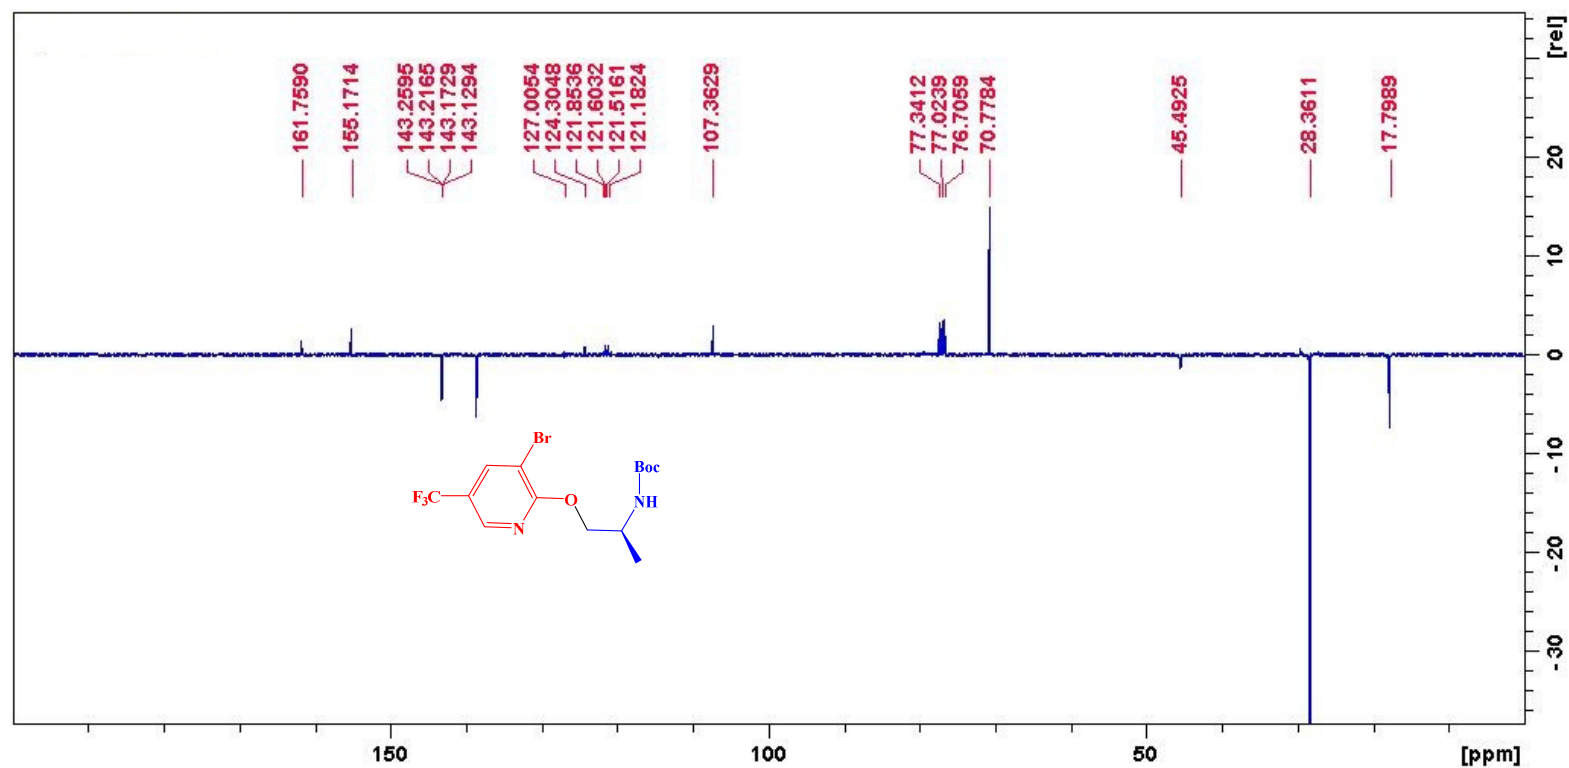

**$^{19}\text{F}$  NMR spectra of 5i**

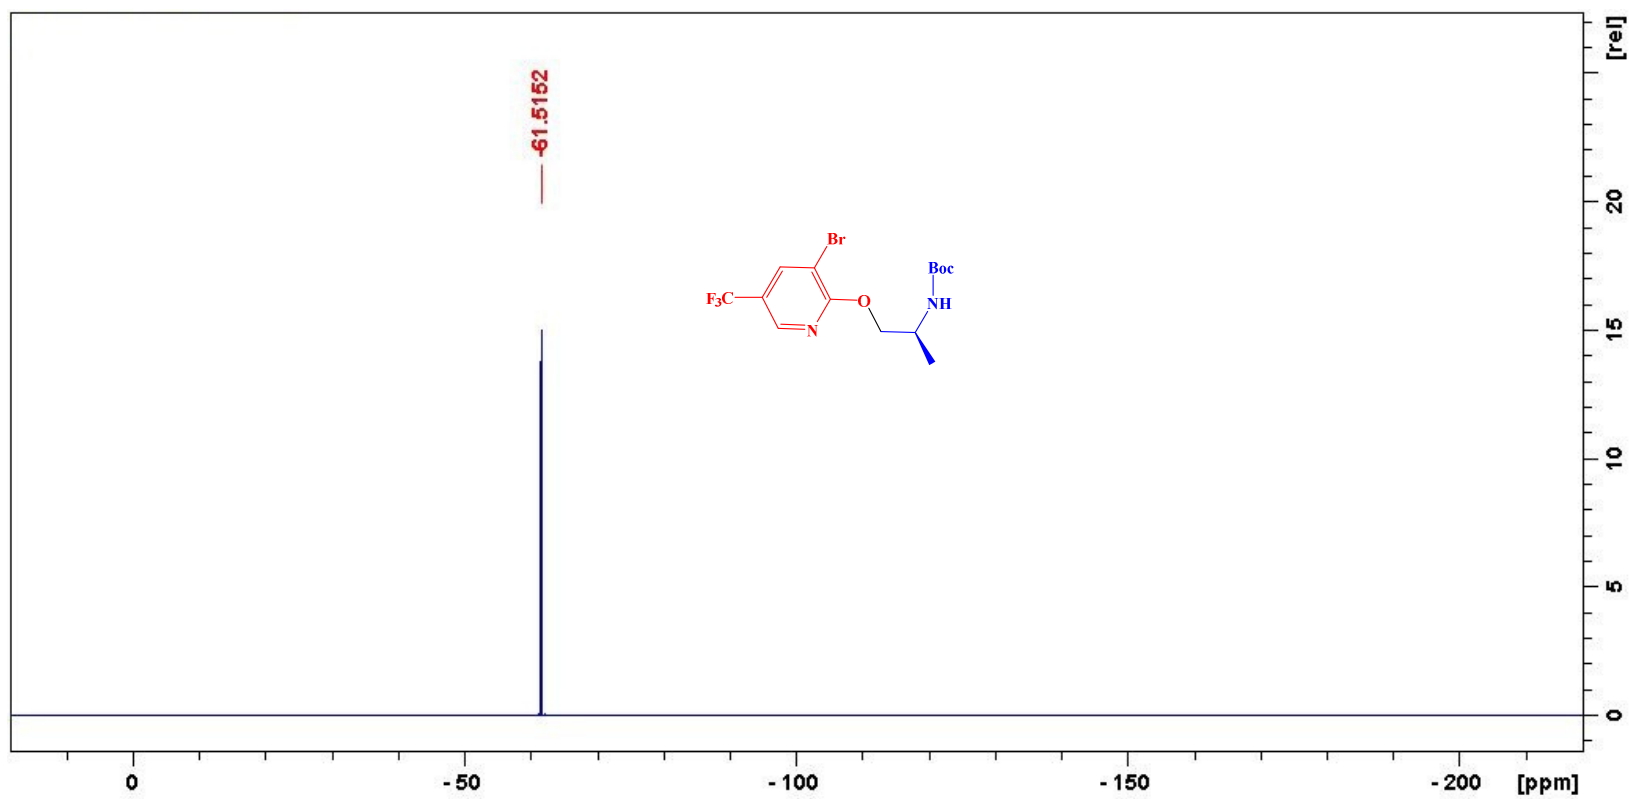

<sup>1</sup>H NMR spectra of 6a

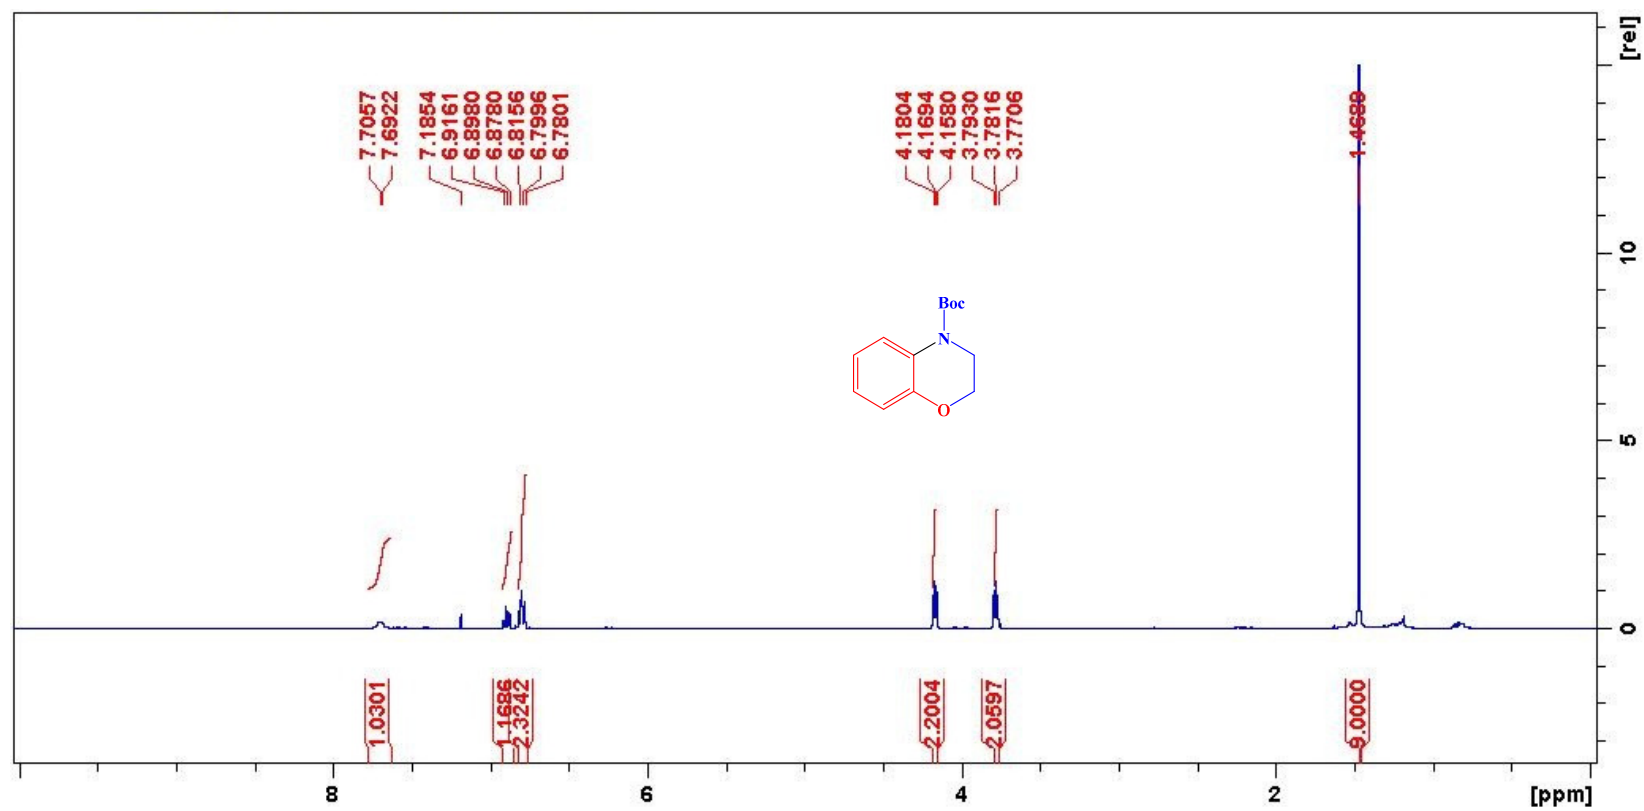

<sup>13</sup>C NMR spectra of 6a

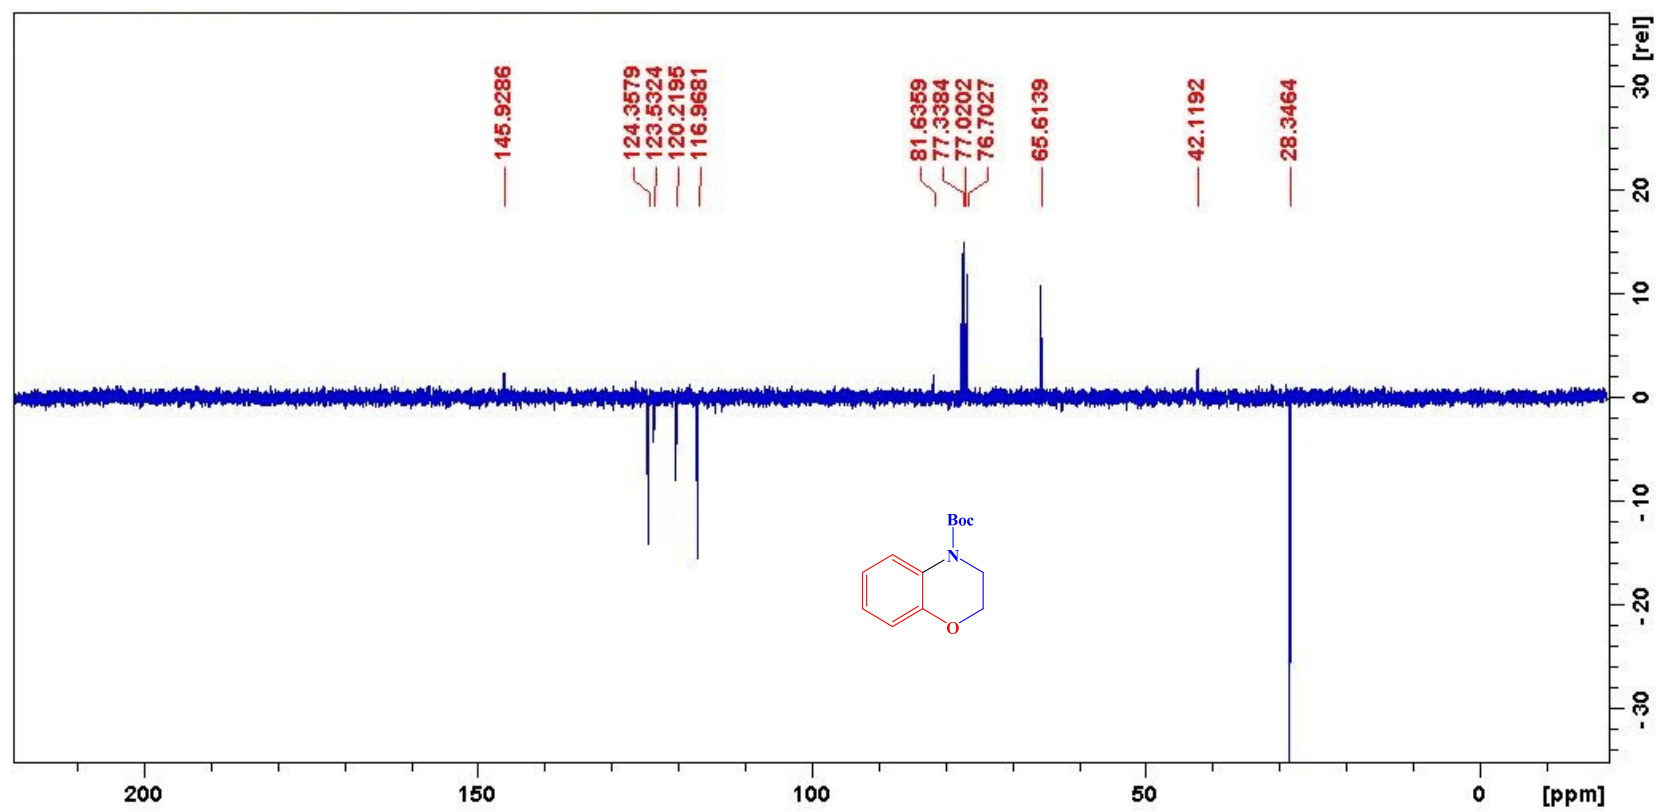

# COSY spectra of 6a

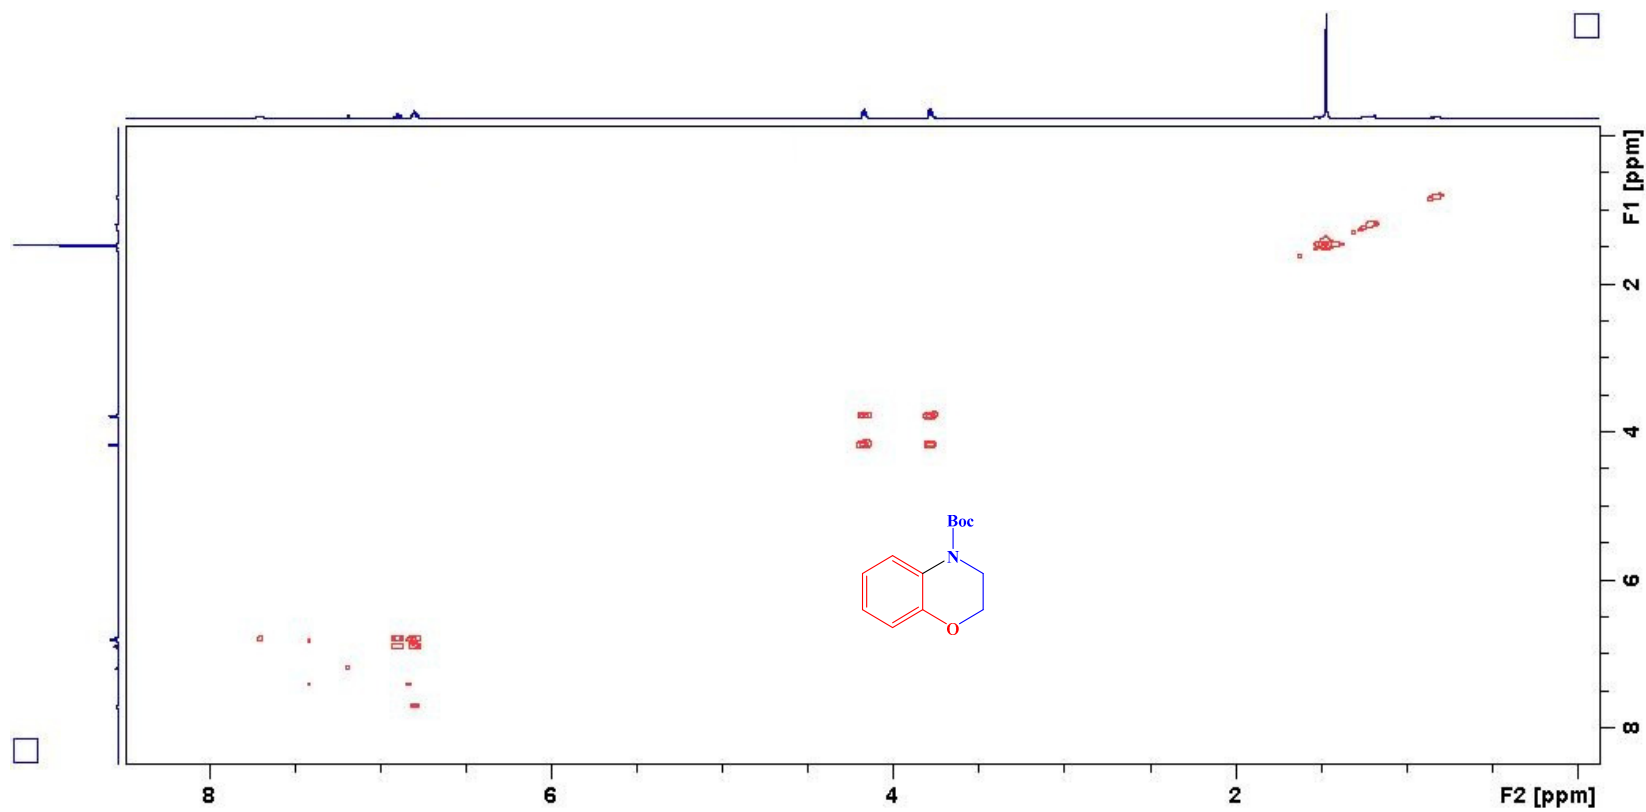

## HSQC spectra of 6a

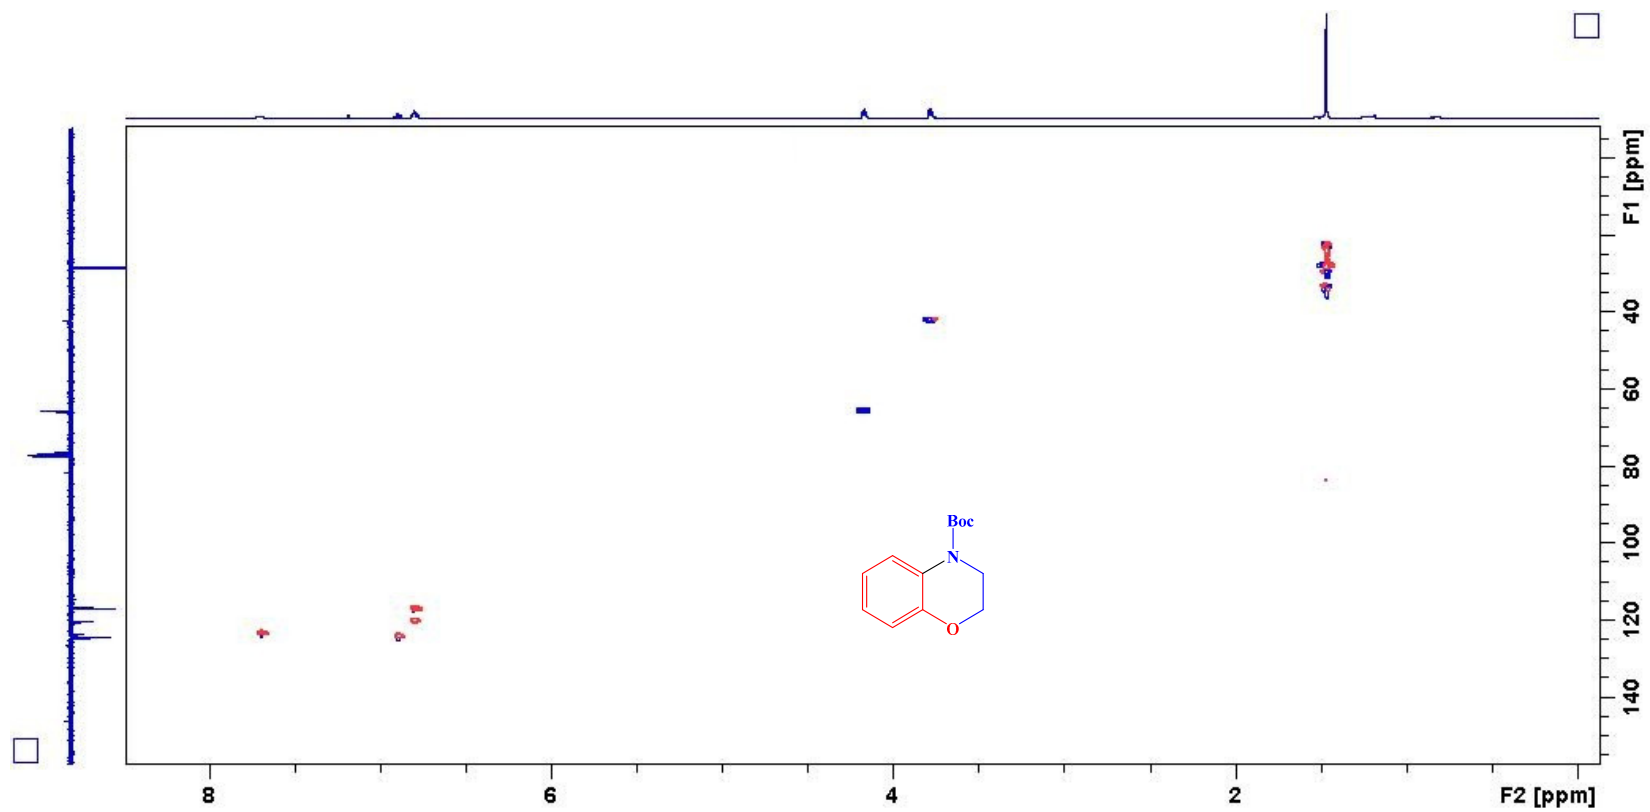

$^1\text{H}$  NMR spectra of **6c**

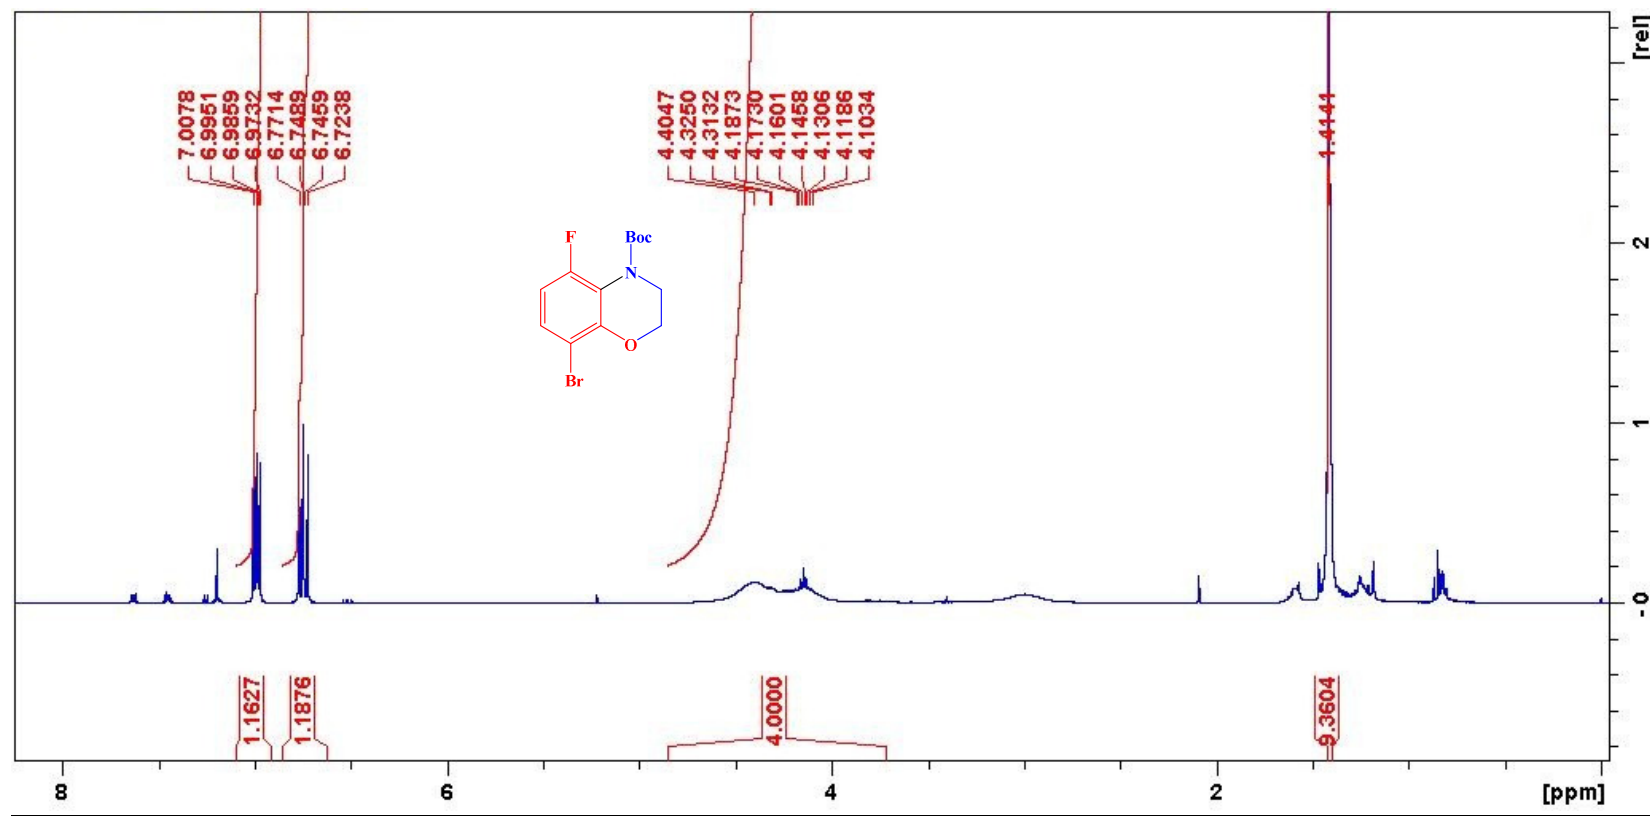

$^{13}\text{C}$  NMR spectra of **6c**

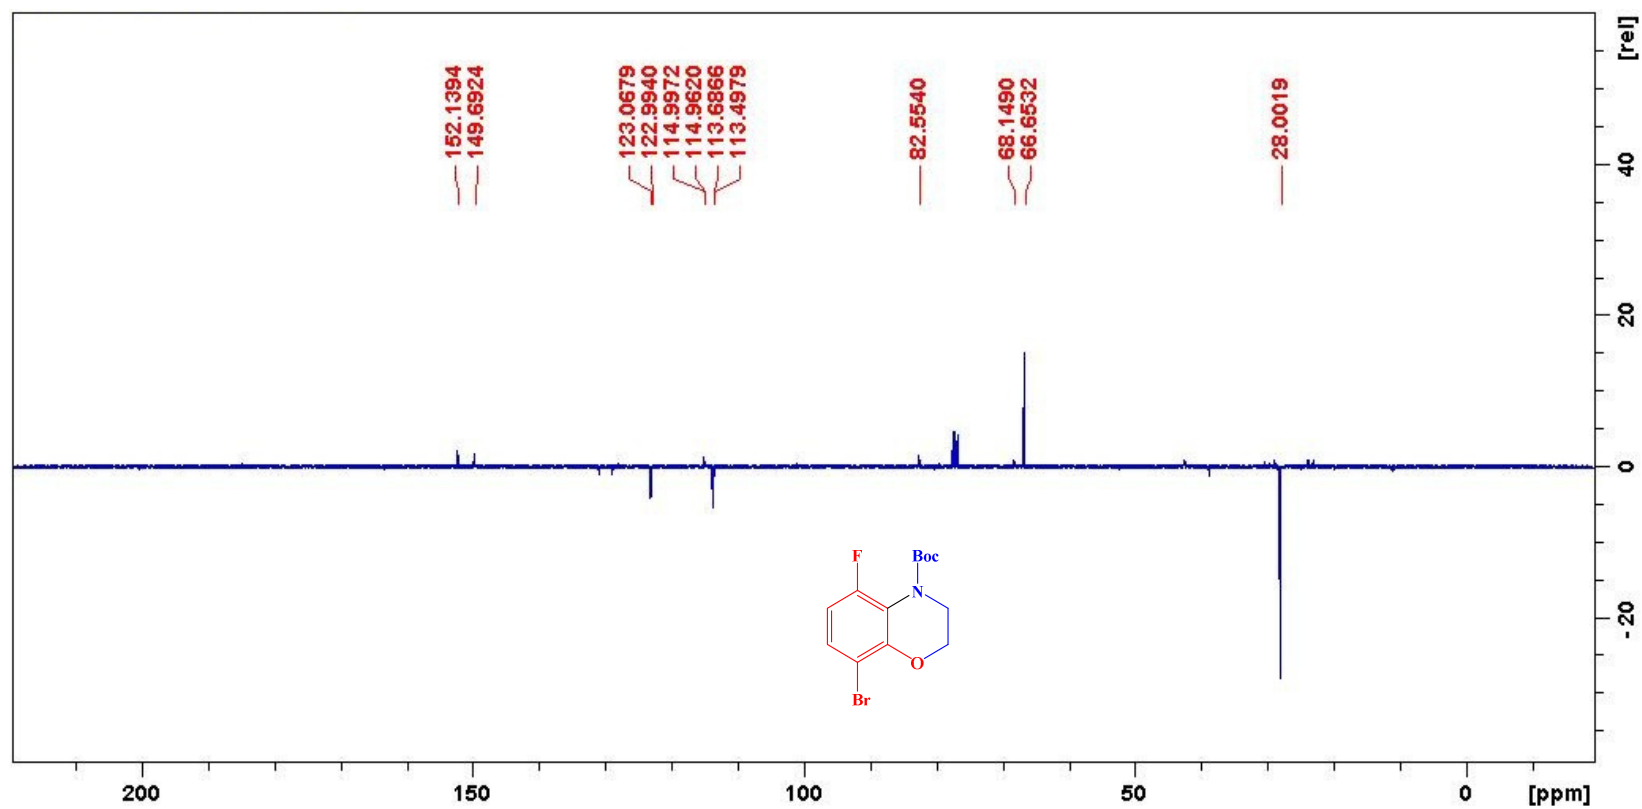



$^{19}\text{F}$  NMR spectra of **6c**

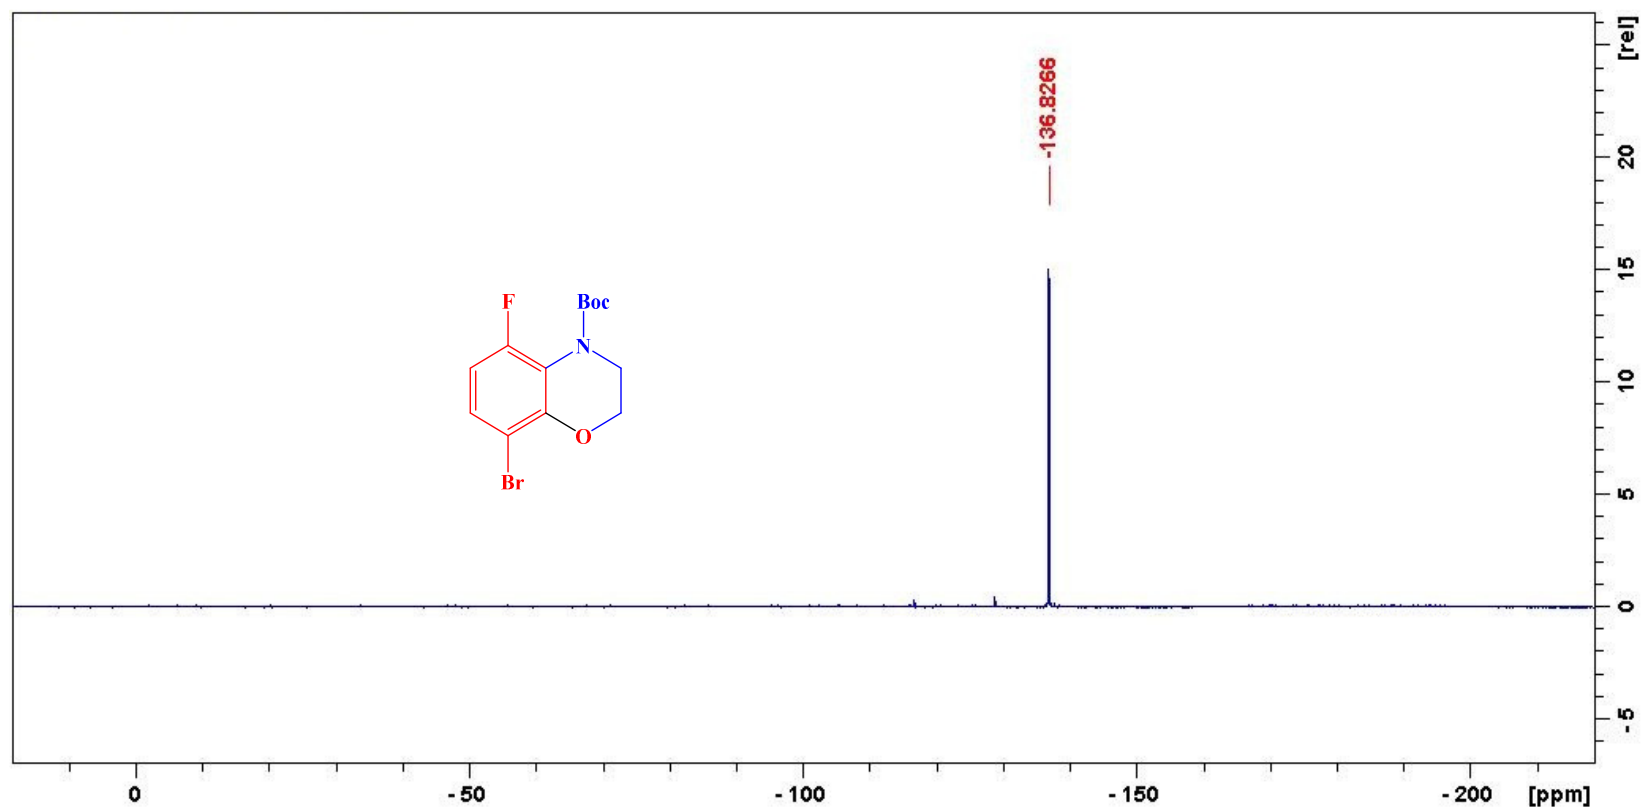

HSQC spectra of **6c**

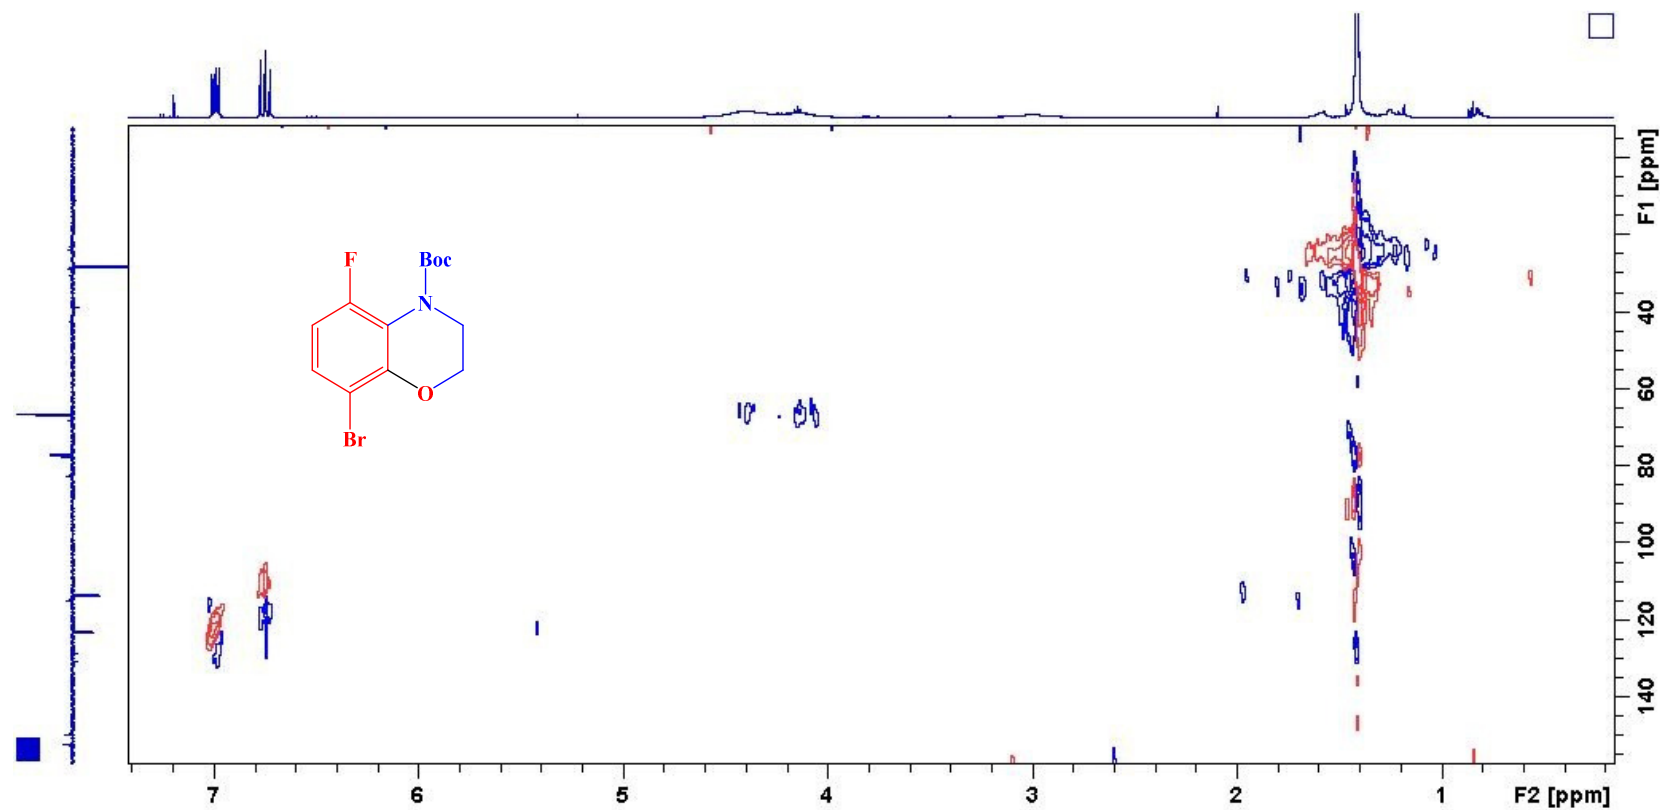

<sup>1</sup>H NMR spectra of 6d

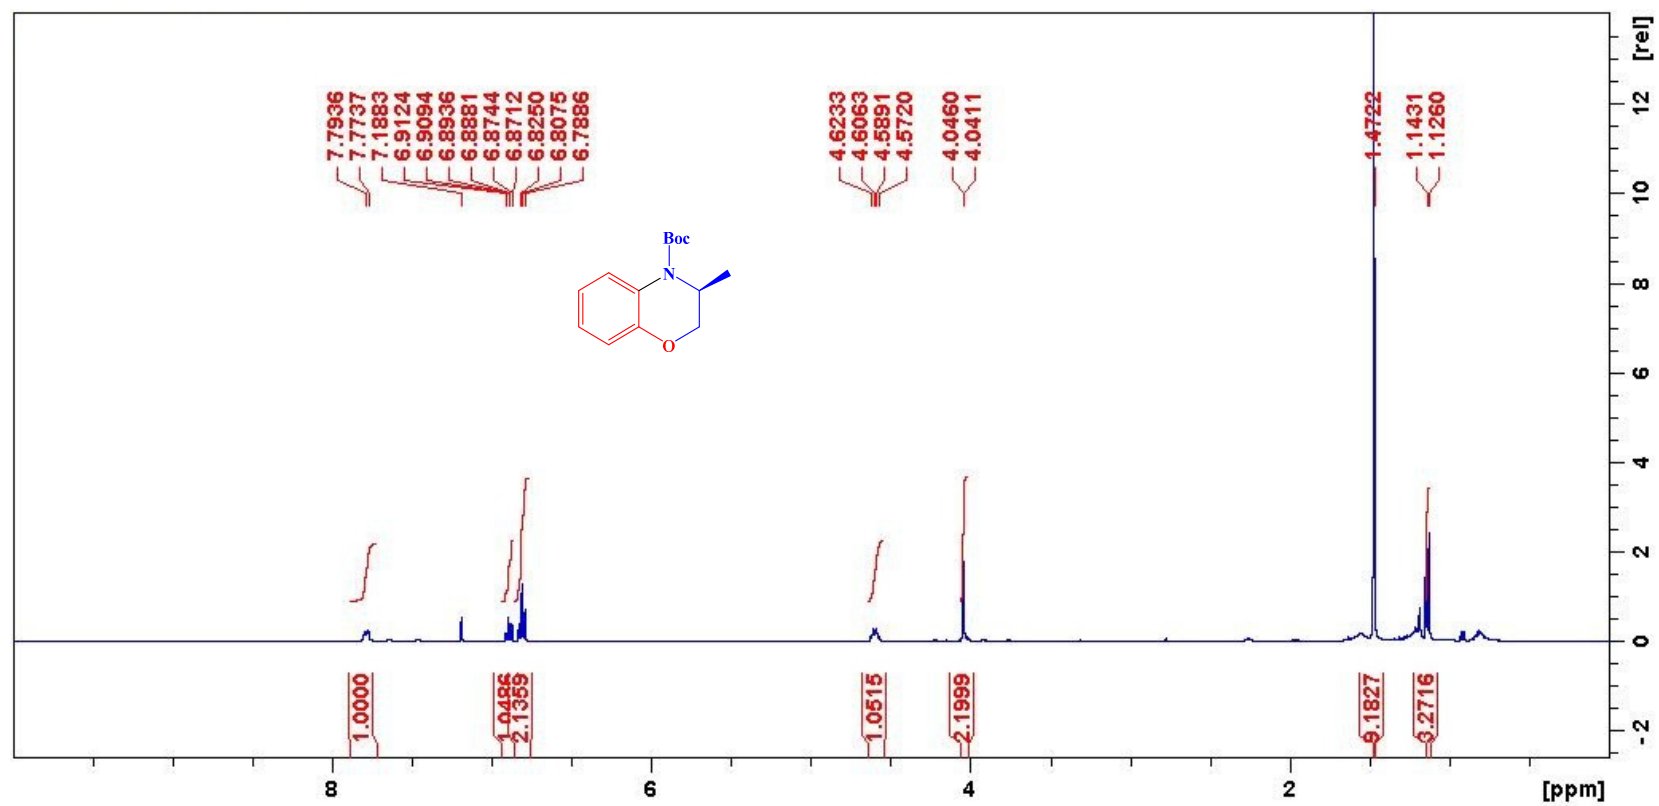

<sup>13</sup>C NMR spectra of 6d

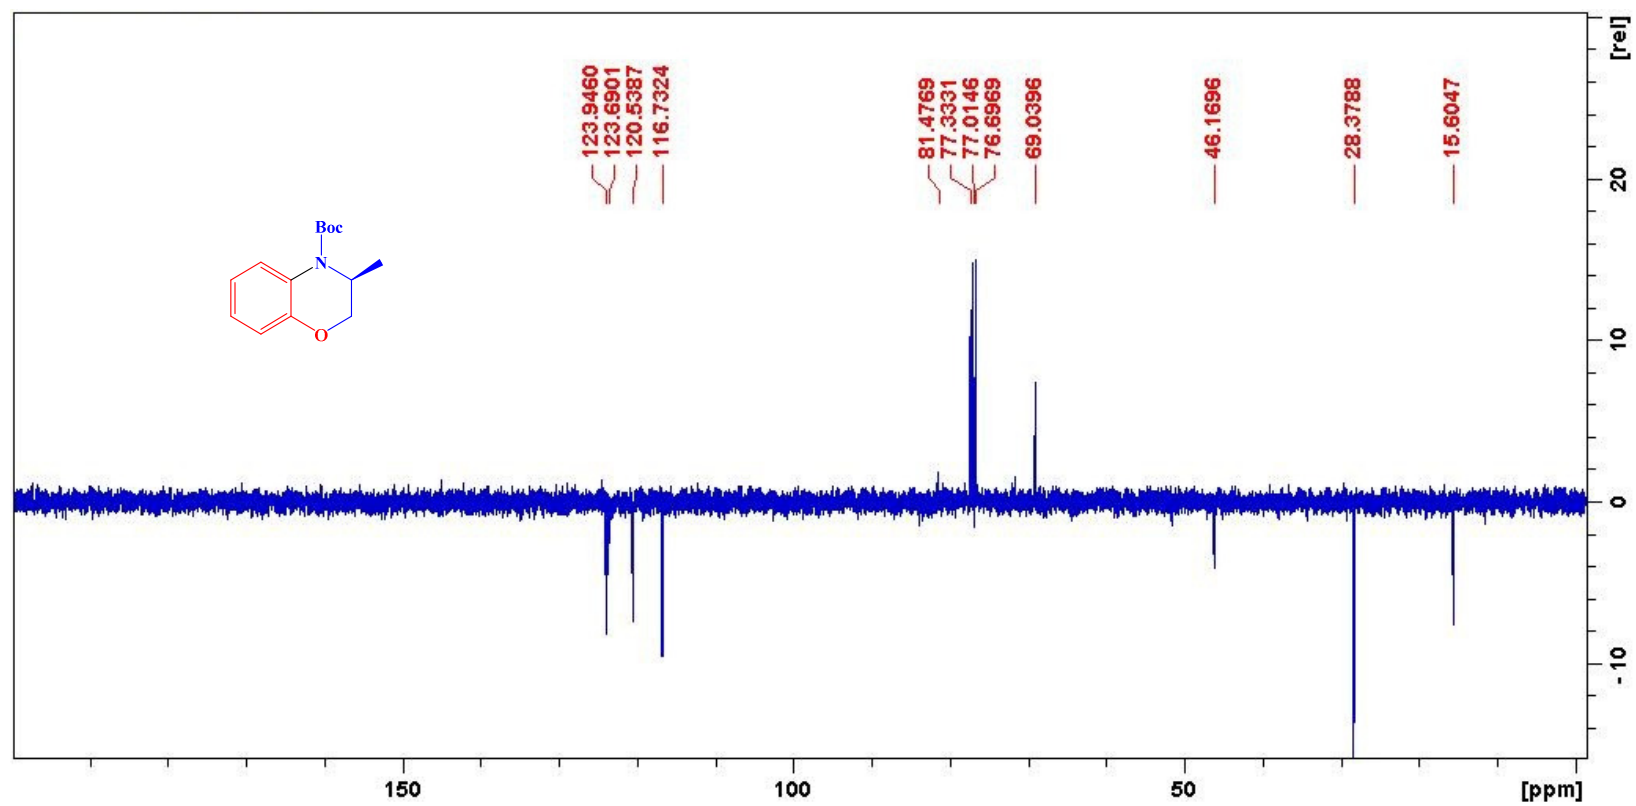

# <sup>1</sup>H NMR of 6f

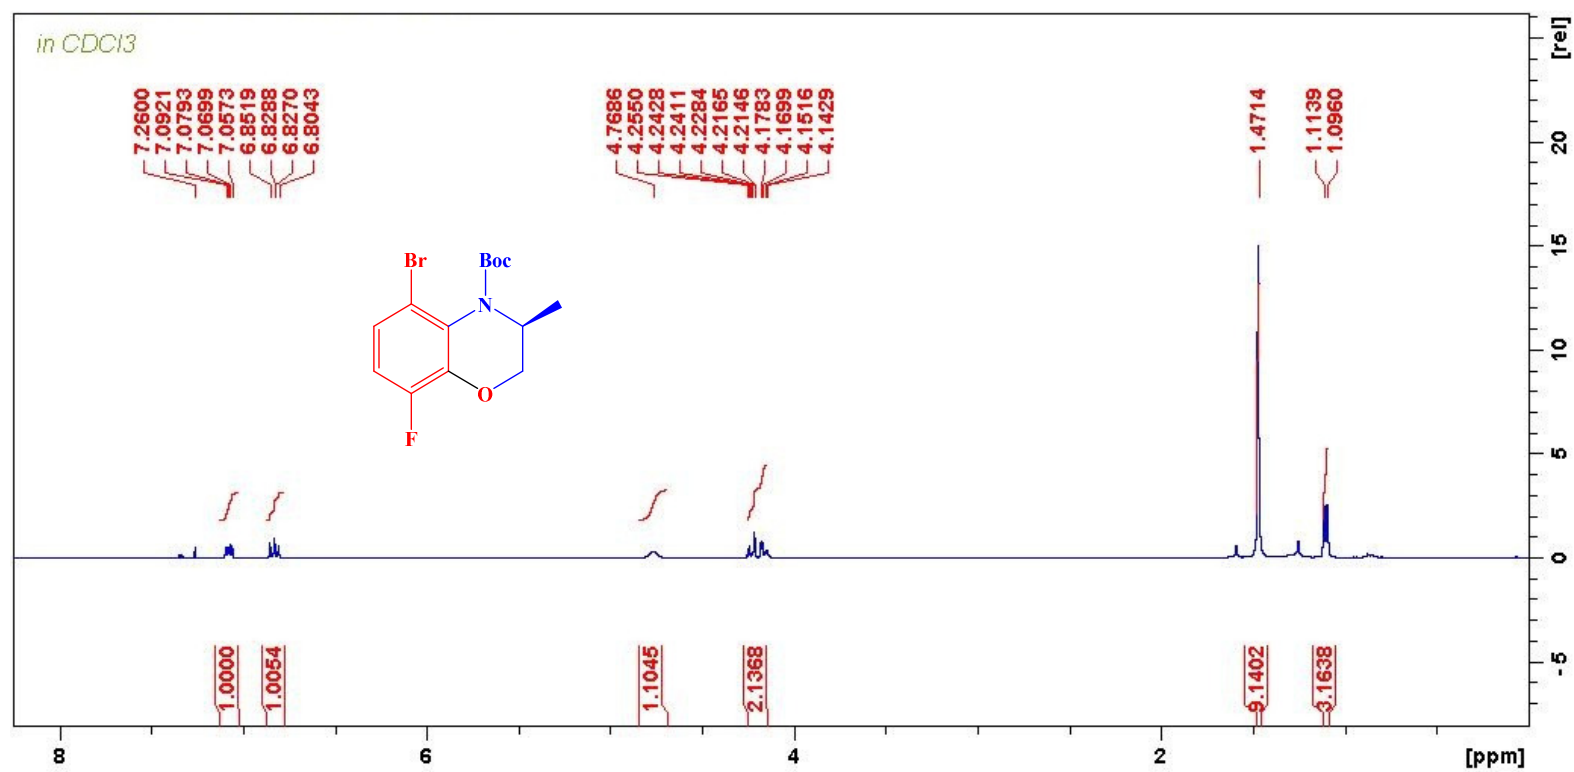

$^{13}\text{C}$  NMR of 6f

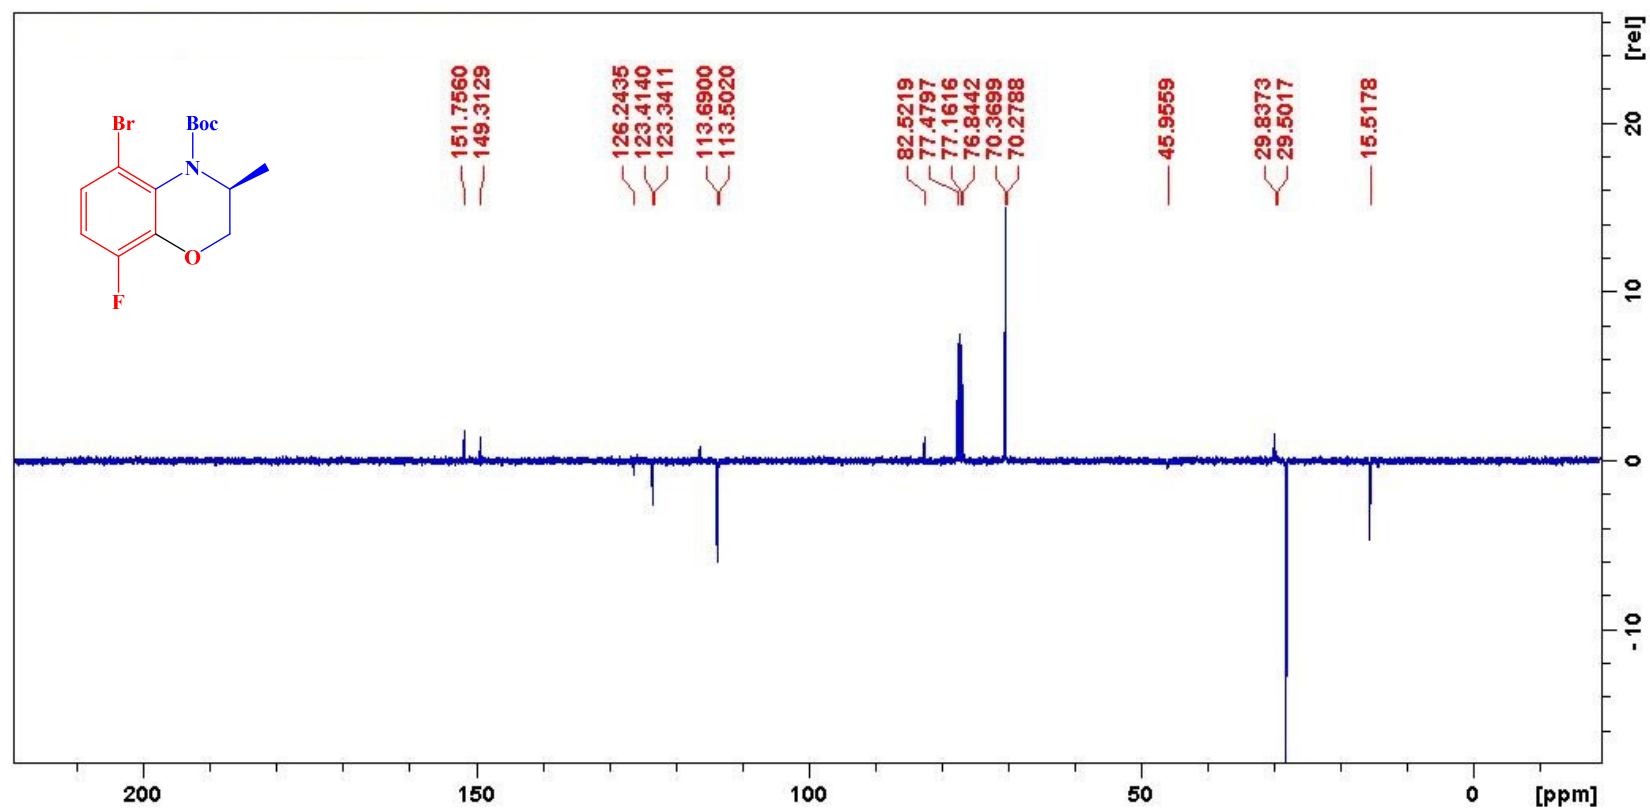

<sup>19</sup>F NMR of 6f

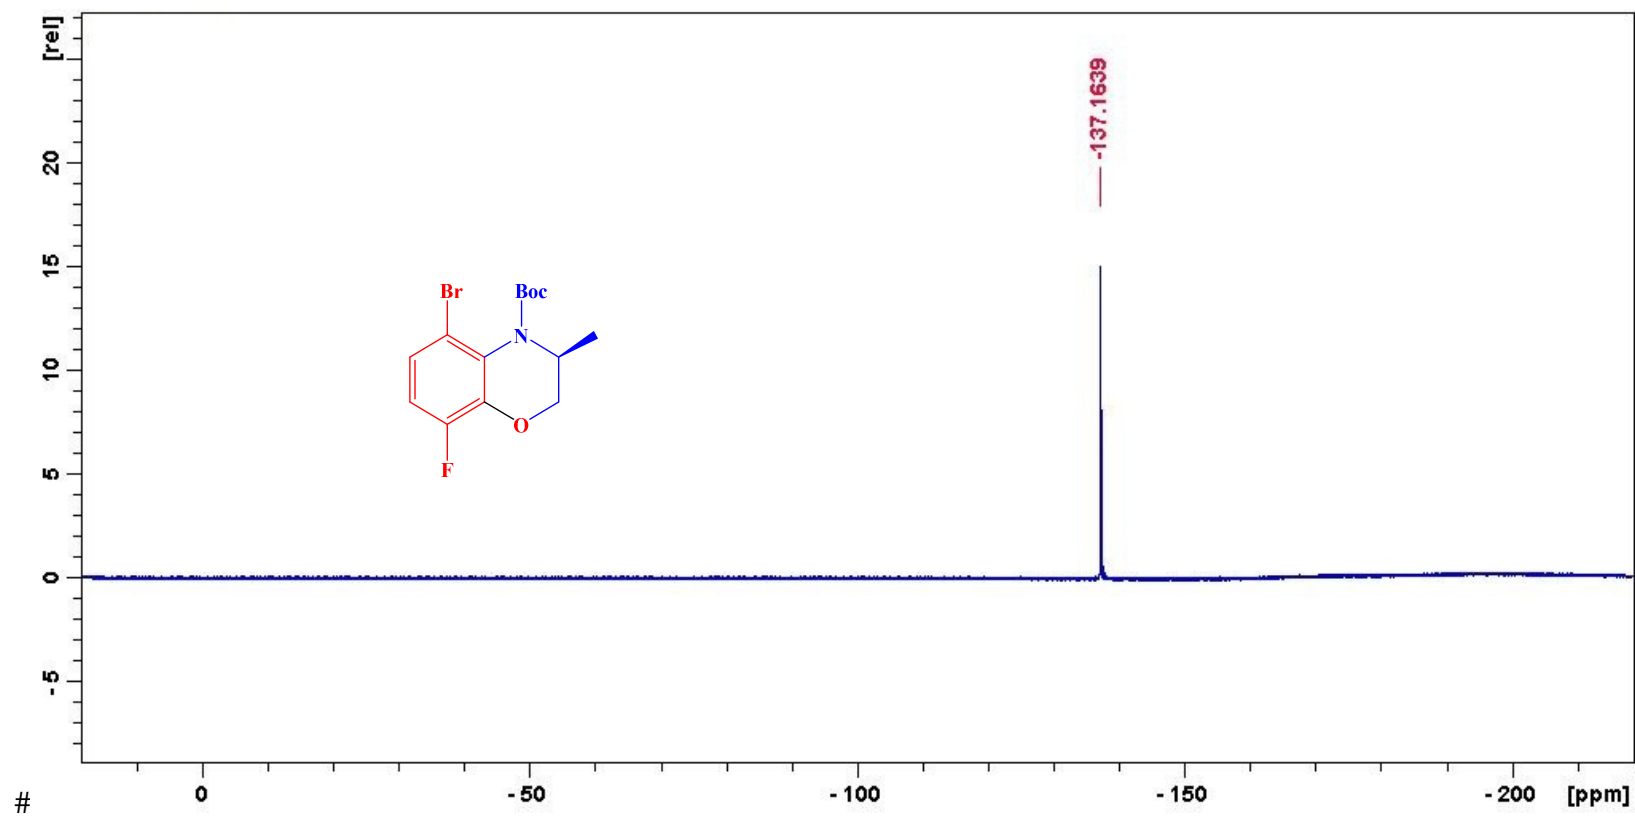

## HSQC spectra of 6f

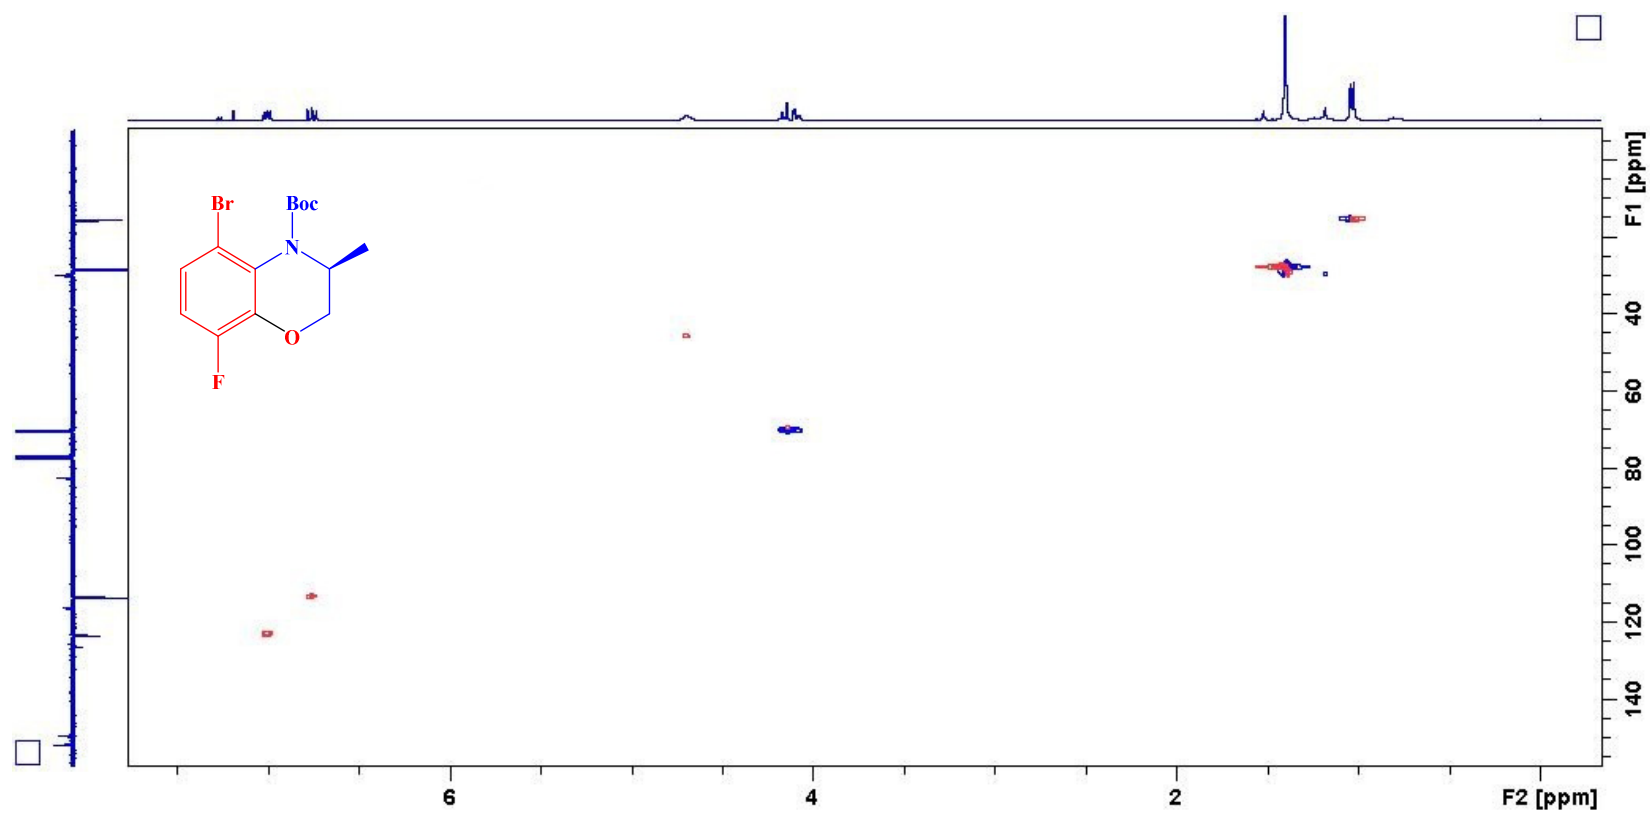



## HMBC spectra of 6f

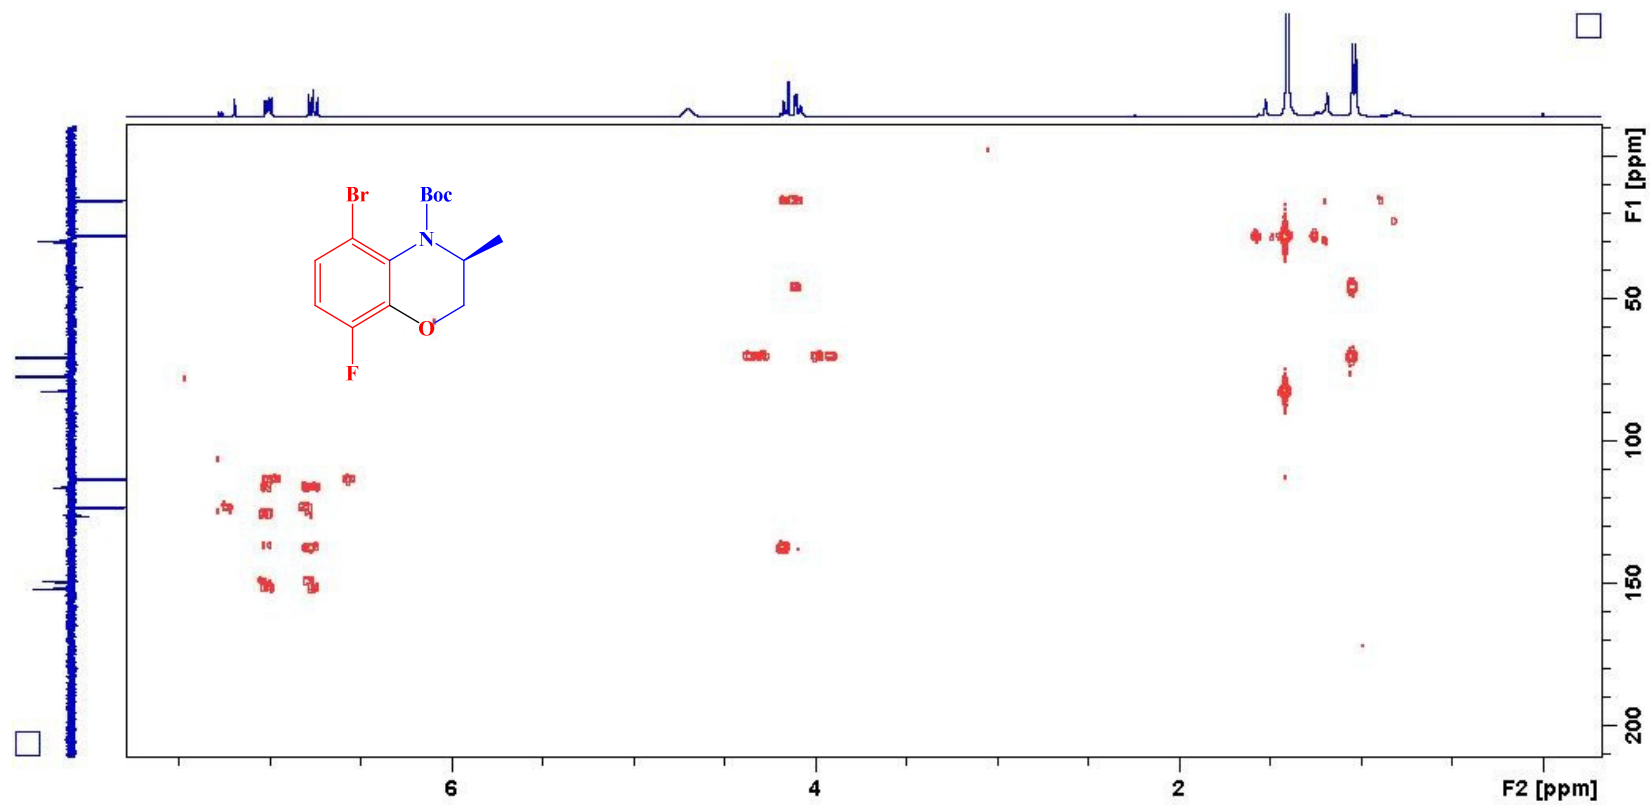

## Expansion of HMBC spectra of 6f

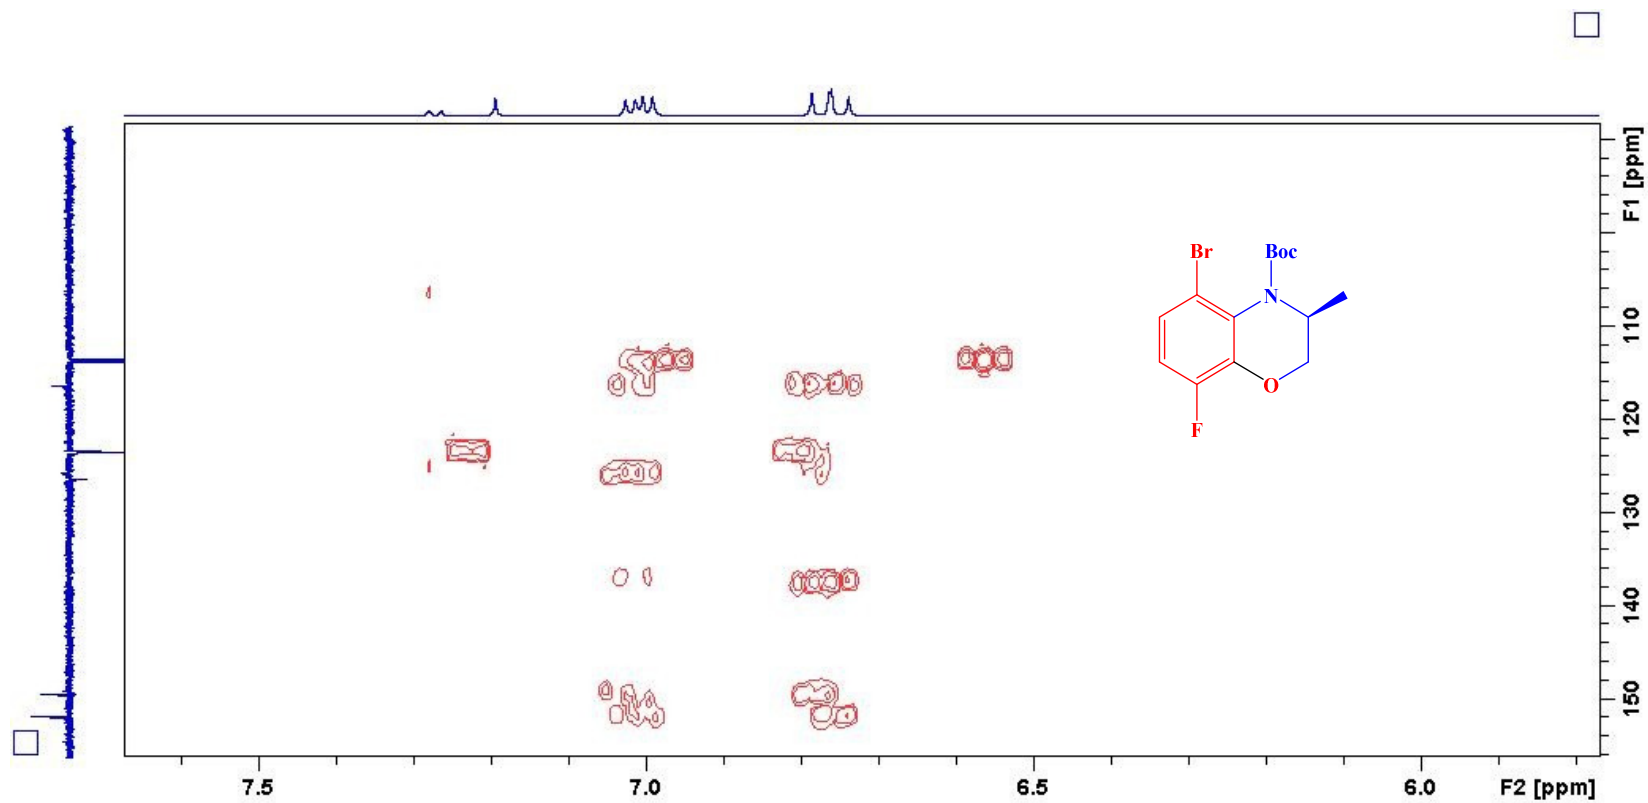

<sup>1</sup>H NMR of (S)-5-bromo-8-fluoro-3-methyl-3,4-dihydro-2H-benzo[b][1,4]oxazine (6f deprotected):

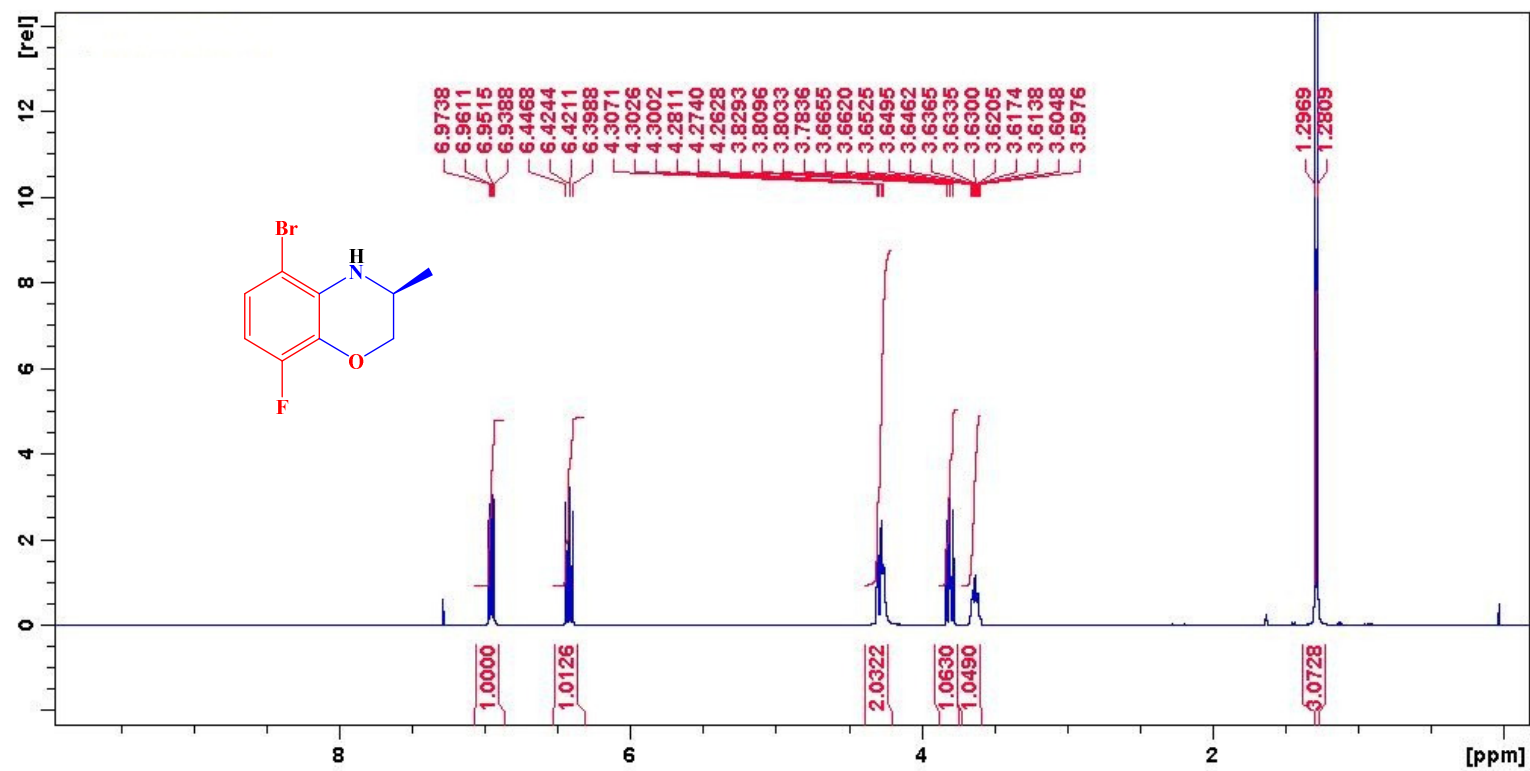

<sup>13</sup>C NMR of (S)-5-bromo-8-fluoro-3-methyl-3,4-dihydro-2H-benzo[*b*][1,4]oxazine (6f deprotected):

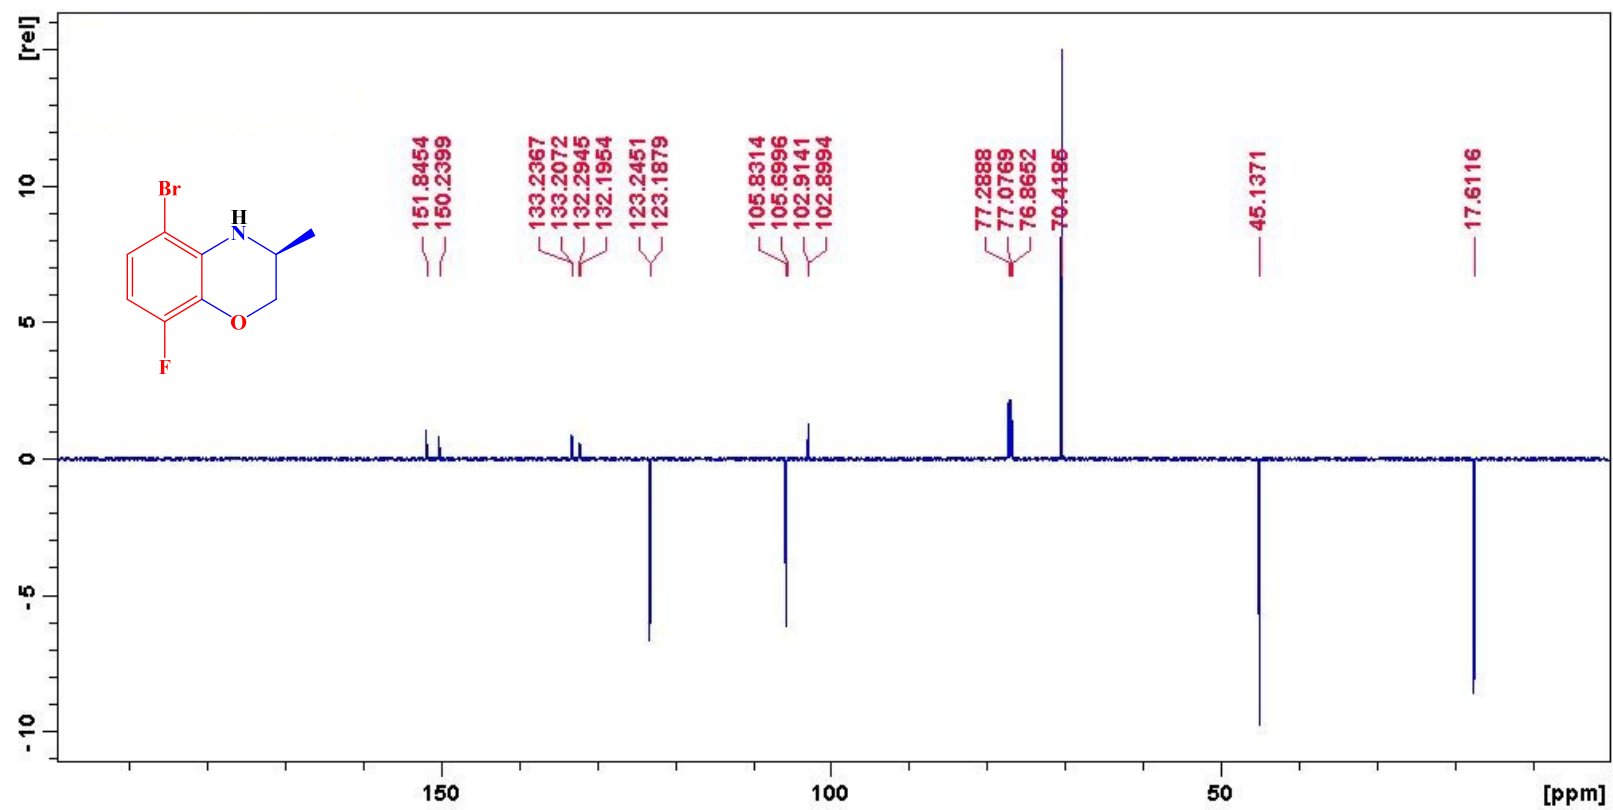

**$^{19}\text{F}$  NMR of (S)-5-bromo-8-fluoro-3-methyl-3,4-dihydro-2H-benzo[b][1,4]oxazine (6f deprotected):**

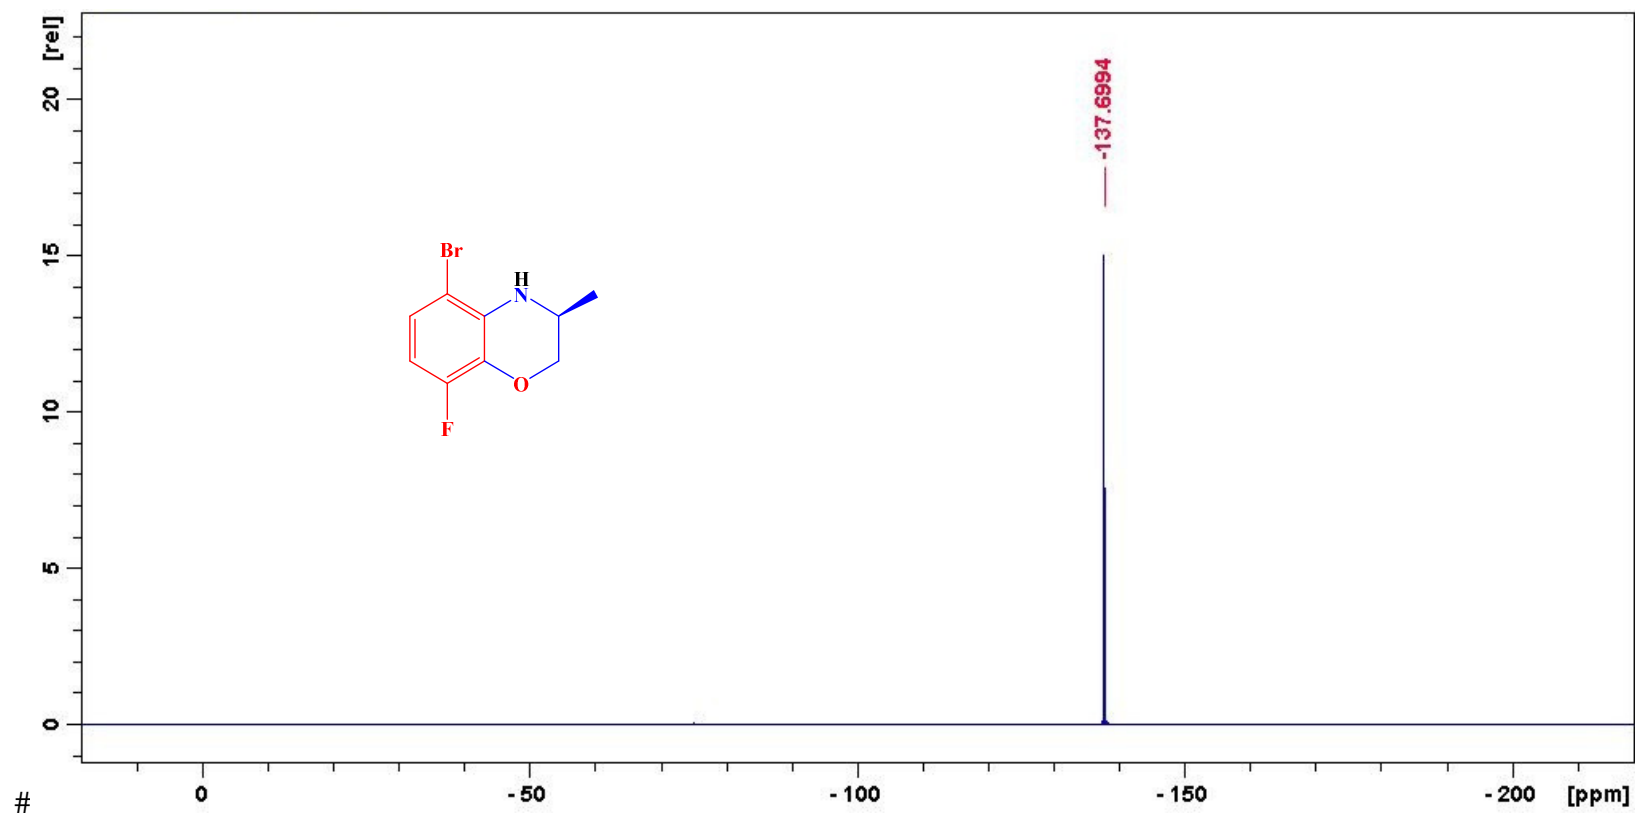

# HRMS

5a

## Elemental Composition Report

Page 1

### Single Mass Analysis

Tolerance = 5.0 PPM / DBE: min = -1.5, max = 100.0

Element prediction: Off

Number of isotope peaks used for i-FIT = 3

Monoisotopic Mass, Even Electron Ions

36 formula(e) evaluated with 1 results within limits (up to 20 closest results for each mass)

Elements Used:

C: 10-15 H: 15-20 N: 0-5 O: 0-5 Na: 1-1 Br: 0-1

SZBr 56 (1.856) Cm (1:61)

TOF MS ES+

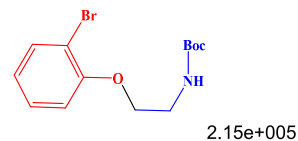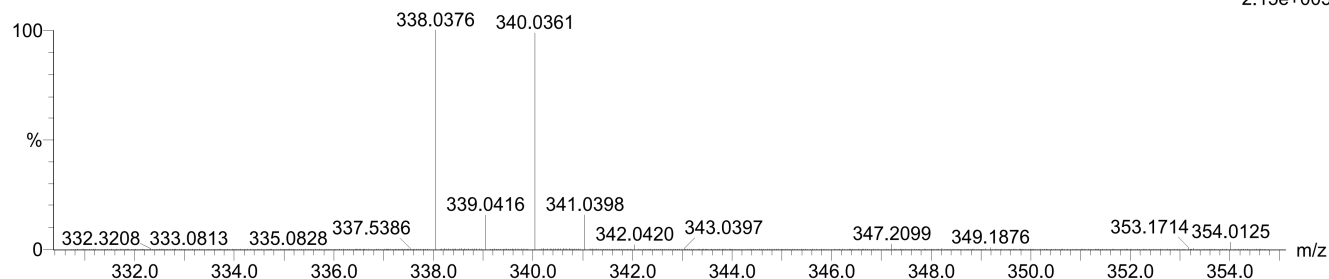

Minimum:

Maximum:

-1.5

100.0

| Mass     | Calc. Mass | mDa | PPM | DBE | i-FIT | i-FIT (Norm) | Formula            |
|----------|------------|-----|-----|-----|-------|--------------|--------------------|
| 338.0376 | 338.0368   | 0.8 | 2.4 | 4.5 | 612.6 | 0.0          | C13 H18 N O3 Na Br |

5b

# Elemental Composition Report

Page 1

## Single Mass Analysis

Tolerance = 5.0 PPM / DBE: min = -1.5, max = 100.0

Element prediction: Off

Number of isotope peaks used for i-FIT = 3

Monoisotopic Mass, Even Electron Ions

46 formula(e) evaluated with 1 results within limits (up to 20 closest results for each mass)

Elements Used:

C: 10-15 H: 15-20 N: 0-5 O: 0-5 Na: 1-1 I: 0-1

SZI 8 (0.236) Cm (1.61)

TOF MS ES+

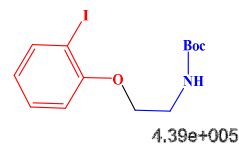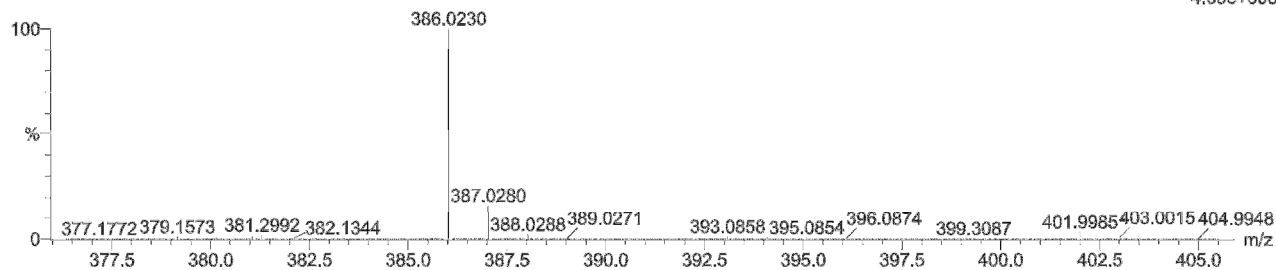

Minimum: -1.5  
Maximum: 5.0 5.0 100.0

| Mass     | Calc. Mass | mDa | PPM | DBE | i-FIT | i-FIT (Norm) | Formula           |
|----------|------------|-----|-----|-----|-------|--------------|-------------------|
| 386.0230 | 386.0229   | 0.1 | 0.3 | 4.5 | 640.5 | 0.0          | C13 H18 N O3 Na I |

5c

## Elemental Composition Report

Page 1

## Single Mass Analysis

Tolerance = 5.0 PPM / DBE: min = -1.5, max = 100.0

Element prediction: Off

Number of isotope peaks used for i-FIT = 3

Monoisotopic Mass, Even Electron Ions

82 formula(e) evaluated with 1 results within limits (up to 20 closest results for each mass)

Elements Used:

C: 10-15 H: 15-20 N: 0-5 O: 0-5 F: 0-1 Na: 1-1 Br: 0-1

SZ1F 58 (1.923) Cm (1:61)

TOF MS ES+

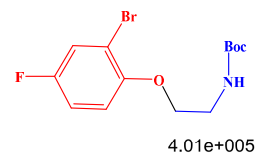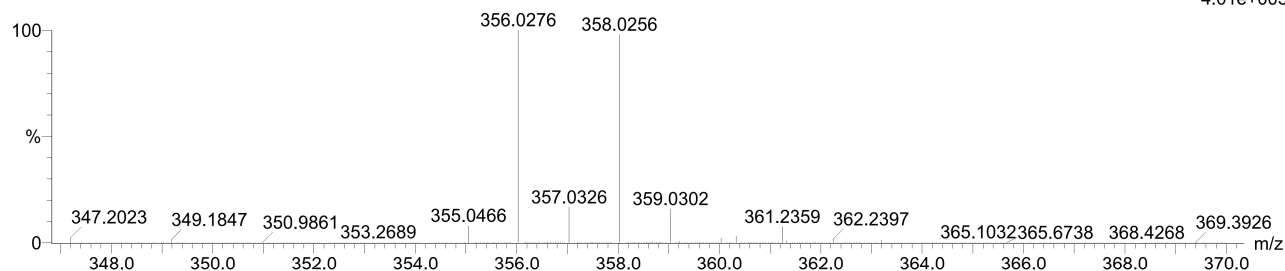

Minimum:

Maximum: 5.0 5.0 -1.5

| Mass     | Calc. Mass | mDa | PPM | DBE | i-FIT | i-FIT (Norm) | Formula              |
|----------|------------|-----|-----|-----|-------|--------------|----------------------|
| 356.0276 | 356.0274   | 0.2 | 0.6 | 4.5 | 643.4 | 0.0          | C13 H17 N O3 F Na Br |



5d

## Elemental Composition Report

Page 1

### Single Mass Analysis

Tolerance = 5.0 PPM / DBE: min = -1.5, max = 100.0

Element prediction: Off

Number of isotope peaks used for i-FIT = 3

Monoisotopic Mass, Even Electron Ions

129 formula(e) evaluated with 1 results within limits (up to 20 closest results for each mass)

Elements Used:

C: 10-15 H: 15-20 N: 0-5 O: 0-5 F: 0-2 Na: 1-1 Br: 0-1

SZLV 10 (0.304) Cm (1:61)

TOF MS ES+

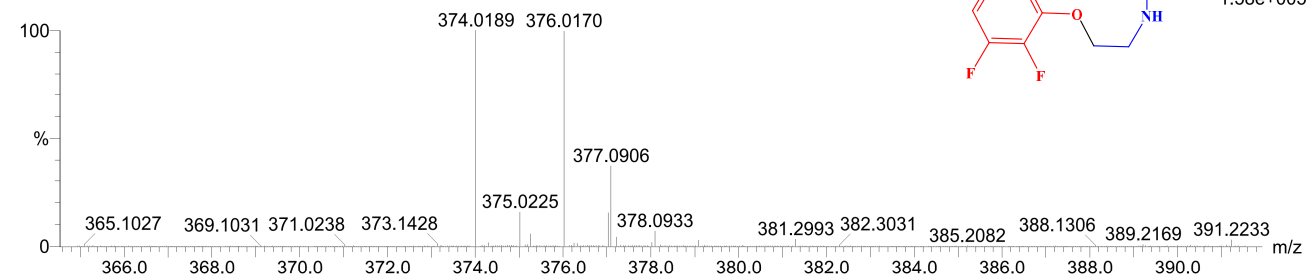

Minimum:

Maximum: 5.0 5.0 -1.5

Mass Calc. Mass mDa PPM DBE i-FIT i-FIT (Norm) Formula

374.0189 374.0179 1.0 2.7 4.5 586.2 0.0 C13 H16 N O3 F2 Na Br

Elemental Composition Report

Single Mass Analysis

Tolerance = 5.0 PPM / DBE: min = -1.5, max = 100.0

Element prediction: Off

Number of isotope peaks used for i-FIT = 3

Monoisotopic Mass, Even Electron Ions

87 formula(e) evaluated with 1 results within limits (up to 20 closest results for each mass)

Elements Used:

C: 10-15 H: 20-25 N: 0-5 O: 0-5 Br: 0-1 Na: 0-1

SZBrMe 2 (0.034) Cm (1:61)

TOF MS ES+

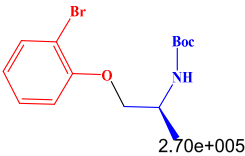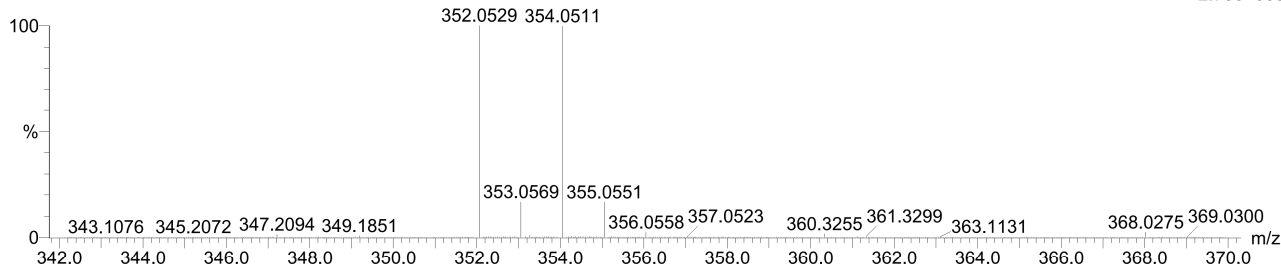

Minimum: -1.5  
Maximum: 5.0 5.0 100.0

| Mass     | Calc. Mass | mDa | PPM | DBE | i-FIT | i-FIT (Norm) | Formula            |
|----------|------------|-----|-----|-----|-------|--------------|--------------------|
| 352.0529 | 352.0524   | 0.5 | 1.4 | 4.5 | 639.4 | 0.0          | C14 H20 N O3 Br Na |

5f

## Elemental Composition Report

Page 1

## Single Mass Analysis

Tolerance = 5.0 PPM / DBE: min = -1.5, max = 100.0

Element prediction: Off

Number of isotope peaks used for i-FIT = 3

Monoisotopic Mass, Even Electron Ions

48 formula(e) evaluated with 1 results within limits (up to 20 closest results for each mass)

Elements Used:

C: 10-15 H: 15-20 N: 0-5 O: 0-5 I: 0-1 Na: 1-1

SZIMe 57 (1.690) Cm (1:61)

TOF MS ES+

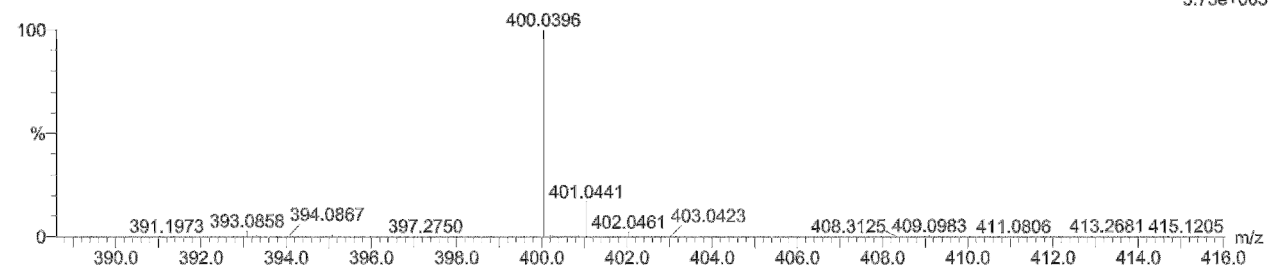

Minimum:

Maximum: 5.0 5.0 -1.5 100.0

| Mass | Calc. Mass | mDa | PPM | DBE | i-FIT | i-FIT (Norm) | Formula |
|------|------------|-----|-----|-----|-------|--------------|---------|
|------|------------|-----|-----|-----|-------|--------------|---------|

|          |          |     |     |     |       |     |                   |
|----------|----------|-----|-----|-----|-------|-----|-------------------|
| 400.0396 | 400.0386 | 1.0 | 2.5 | 4.5 | 642.4 | 0.0 | C14 H20 N O3 I Na |
|----------|----------|-----|-----|-----|-------|-----|-------------------|

5g

# Elemental Composition Report

Page 1

## Single Mass Analysis

Tolerance = 5.0 PPM / DBE: min = -1.5, max = 100.0

Element prediction: Off

Number of isotope peaks used for i-FIT = 3

Monoisotopic Mass, Even Electron Ions

87 formula(e) evaluated with 1 results within limits (up to 20 closest results for each mass)

Elements Used:

C: 10-15 H: 15-20 N: 0-5 O: 0-5 F: 0-1 Na: 1-1 Br: 0-1

SZ1FMe 8 (0.236) Cm (1:61)

TOF MS ES+

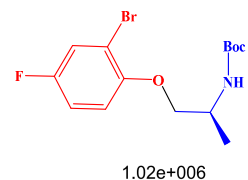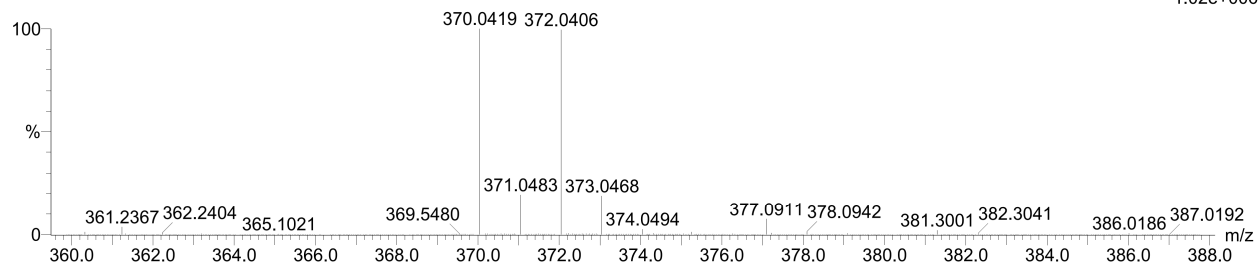

Minimum:

Maximum: 5.0 5.0 -1.5 100.0

| Mass     | Calc. Mass | mDa  | PPM  | DBE | i-FIT | i-FIT (Norm) | Formula              |
|----------|------------|------|------|-----|-------|--------------|----------------------|
| 370.0419 | 370.0430   | -1.1 | -3.0 | 4.5 | 680.6 | 0.0          | C14 H19 N O3 F Na Br |

5h

# Elemental Composition Report

Page 1

## Single Mass Analysis

Tolerance = 5.0 PPM / DBE: min = -1.5, max = 100.0

Element prediction: Off

Number of isotope peaks used for i-FIT = 3

Monoisotopic Mass, Even Electron Ions

138 formula(e) evaluated with 1 results within limits (up to 20 closest results for each mass)

Elements Used:

C: 10-15 H: 15-20 N: 0-5 O: 0-5 F: 0-2 Na: 1-1 Br: 0-1

SZLVMe 1 (0.034) Cm (1:60)

TOF MS ES+

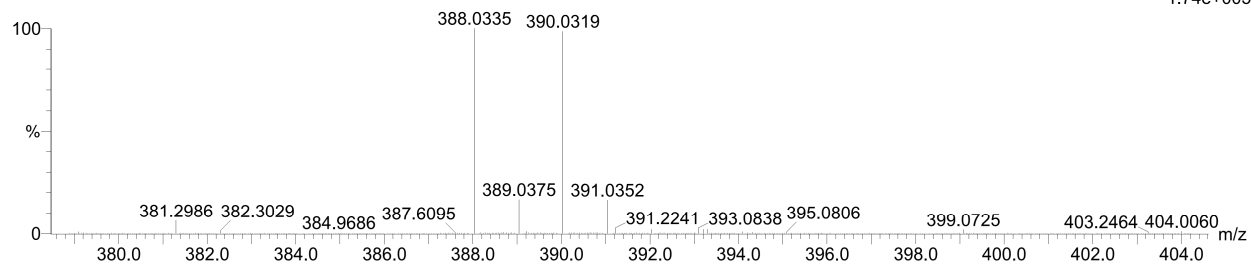

Minimum: -1.5  
Maximum: 5.0 5.0 100.0

| Mass     | Calc. Mass | mDa  | PPM  | DBE | i-FIT | i-FIT (Norm) | Formula               |
|----------|------------|------|------|-----|-------|--------------|-----------------------|
| 388.0335 | 388.0336   | -0.1 | -0.3 | 4.5 | 603.8 | 0.0          | C14 H18 N O3 F2 Na Br |

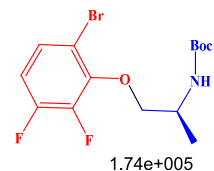

## Elemental Composition Report

Page 1

## Single Mass Analysis

Tolerance = 5.0 PPM / DBE: min = -1.5, max = 100.0

Element prediction: Off

Number of isotope peaks used for i-FIT = 3

Monoisotopic Mass, Even Electron Ions

212 formula(e) evaluated with 1 results within limits (up to 20 closest results for each mass)

Elements Used:

C: 10-15 H: 15-20 N: 0-5 O: 0-5 F: 0-3 Br: 0-1 Na: 1-1

SZCF3NMe 52 (1.720) Cm (1:61)

TOF MS ES+

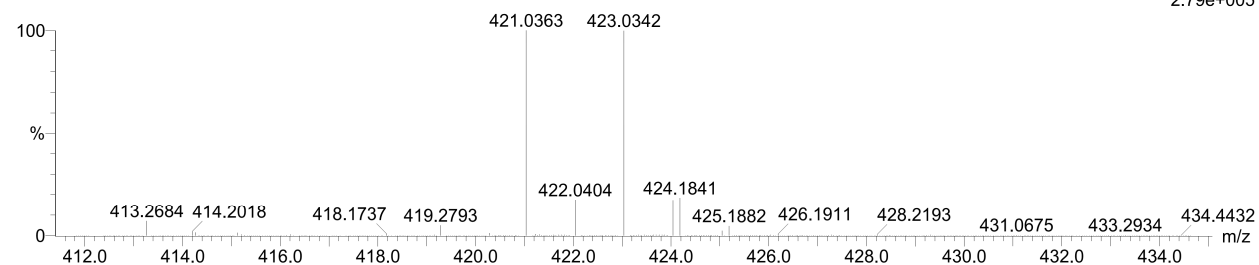

Minimum: -1.5  
Maximum: 5.0 5.0 100.0

| Mass     | Calc. Mass | mDa | PPM | DBE | i-FIT | i-FIT (Norm) | Formula                |
|----------|------------|-----|-----|-----|-------|--------------|------------------------|
| 421.0363 | 421.0351   | 1.2 | 2.9 | 4.5 | 602.5 | 0.0          | C14 H18 N2 O3 F3 Br Na |

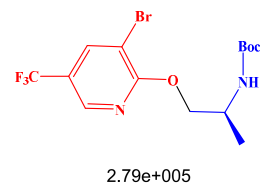

# (S)-5-bromo-8-fluoro-3-methyl-3,4-dihydro-2H-benzo[b][1,4]oxazine:

## Elemental Composition Report

Page 1

### Single Mass Analysis

Tolerance = 5.0 PPM / DBE: min = -1.5, max = 100.0

Element prediction: Off

Number of isotope peaks used for i-FIT = 3

Monoisotopic Mass, Even Electron Ions

66 formula(e) evaluated with 1 results within limits (up to 20 closest results for each mass)

Elements Used:

C: 5-10 H: 5-10 N: 0-5 O: 1-5 F: 0-1 Br: 0-1

DepLVST AP+ 45 (1.484) Cm (1:61)

TOF MS AP+

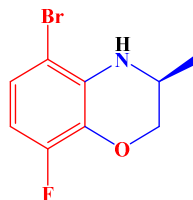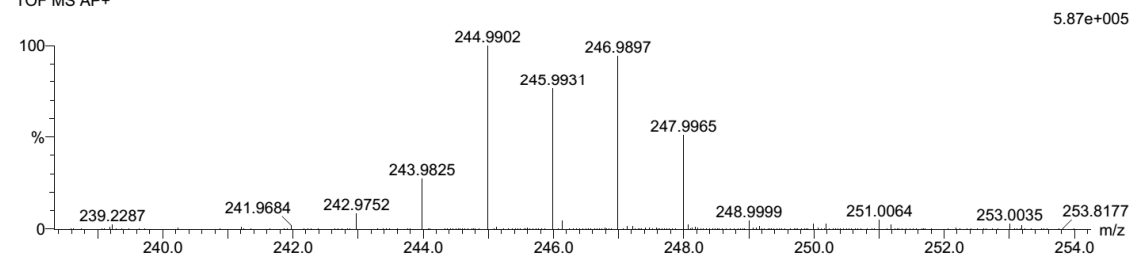

Minimum: -1.5  
Maximum: 5.0 5.0 100.0

| Mass     | Calc. Mass | mDa | PPM | DBE | i-FIT | i-FIT (Norm) | Formula         |
|----------|------------|-----|-----|-----|-------|--------------|-----------------|
| 245.9931 | 245.9930   | 0.1 | 0.4 | 4.5 | 796.6 | 0.0          | C9 H10 N O F Br |

## Elemental analysis for 6f:

Elemental Analysis  
CHNS

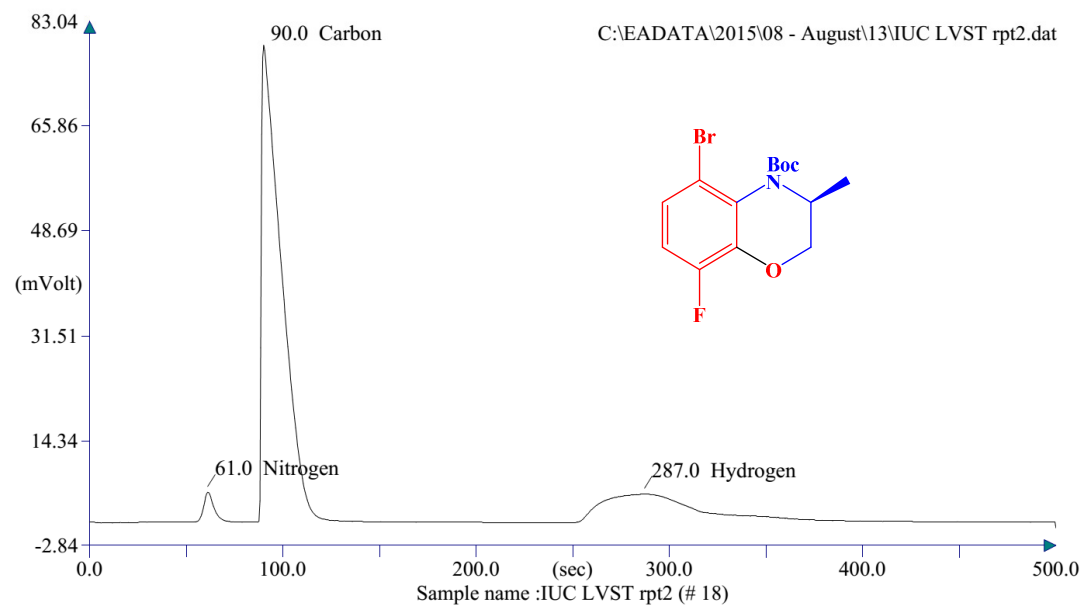

| Retention Time<br>(min) | Element Name | Element % |
|-------------------------|--------------|-----------|
| 1.017                   | Nitrogen     | 3.981     |
| 1.500                   | Carbon       | 48.752    |
| 4.783                   | Hydrogen     | 4.684     |
|                         |              | 57.418    |
